# Supplementary material for: Have primary emission reduction measures reduced ozone across Europe? An analysis of European rural background ozone trends 1996–2005
Source: Copernicus journal article supplement (doi:10.5194/acp-12-437-2012), 2012-01-09
Supplement: Supplementary file [file acp-12-437-2012-supplement.pdf]

# 1 List of Figures

|                                                                                             |    |
|---------------------------------------------------------------------------------------------|----|
| Figure A1: O <sub>3</sub> trends of monthly mean characterised by loess regression.....     | 3  |
| Figure A2: Seasonal cycles of O <sub>3</sub> (ppbv) for the period 1996-2005 inclusive..... | 11 |
| Figure B1: Loess trends of CHIMERE simulated monthly mean O <sub>3</sub> .....              | 45 |

# 2 List of Tables

|                                                                                                                       |    |
|-----------------------------------------------------------------------------------------------------------------------|----|
| Table A1: Characterisation and categorisation of O <sub>3</sub> time series by loess.....                             | 19 |
| Table A2: Quantification of trends in O <sub>3</sub> monthly mean 1996-2005.....                                      | 20 |
| Table A3: Quantification of trends in O <sub>3</sub> monthly 5 <sup>th</sup> percentiles 1996-2005.....               | 24 |
| Table A4: Quantification of trends in O <sub>3</sub> monthly 95 <sup>th</sup> percentiles 1996-2005.....              | 28 |
| Table A5: Quantification of trends in seasonal mean O <sub>3</sub> 1996-2005.....                                     | 32 |
| Table A6: Quantification of trends in seasonal O <sub>3</sub> 5 <sup>th</sup> percentiles 1996-2005.....              | 36 |
| Table A7: Quantification of trends in seasonal O <sub>3</sub> 95 <sup>th</sup> percentiles 1996-2005.....             | 40 |
| Table B1: Quantification of annual CHIMERE model trends in mean O <sub>3</sub> 1996-2005..                            | 53 |
| Table B2: Quantification of annual CHIMERE model trends in O <sub>3</sub> 5 <sup>th</sup> percentiles 1996-2005.....  | 57 |
| Table B3: Quantification of annual CHIMERE model trends in O <sub>3</sub> 95 <sup>th</sup> percentiles 1996-2005..... | 61 |
| Table C1: Sites used in this study and their categorisation.....                                                      | 66 |

### 3 Observed annual and seasonal trends

A compilation of loess trends of monthly mean  $O_3$  for all stations in this study are given in Figure ?? and Table ?? in addition to annual 5<sup>th</sup> and 95<sup>th</sup> percentiles of  $O_3$ . 75% coverage of monthly data was required to calculate statistics.

Trend tables summarising trends in annual mean, 5<sup>th</sup> and 95<sup>th</sup> percentiles for 158 European measurement sites are give in Tables ?? - ??, respectively. A compilation of seasonal cycles from daily mean, 5<sup>th</sup>, and 95<sup>th</sup> percentiles of  $O_3$  for all stations in this study are given in Figure ?. Trend tables summarising trends in seasonal (winter [DJF], spring [MAM], summer [JJA] and autumn [SON]) mean, 5<sup>th</sup> and 95<sup>th</sup> percentiles for 158 European measurement sites are give in Tables ?? - ??, respectively.

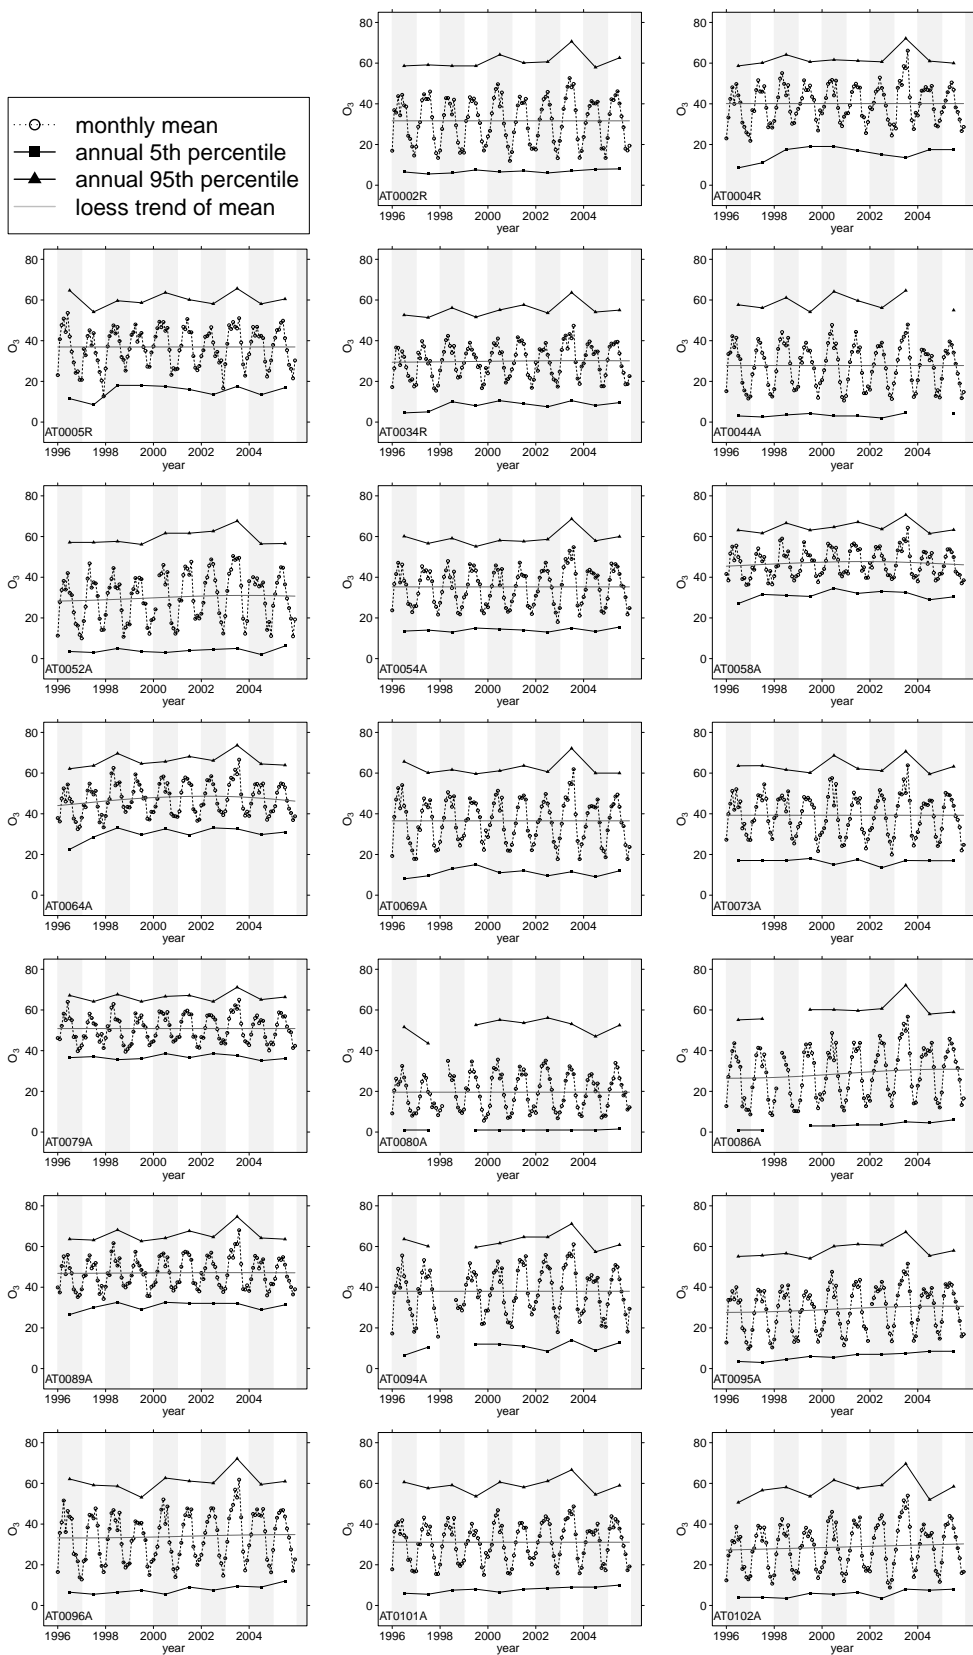

Figure A1:  $O_3$  trends of monthly mean characterised by loess regression

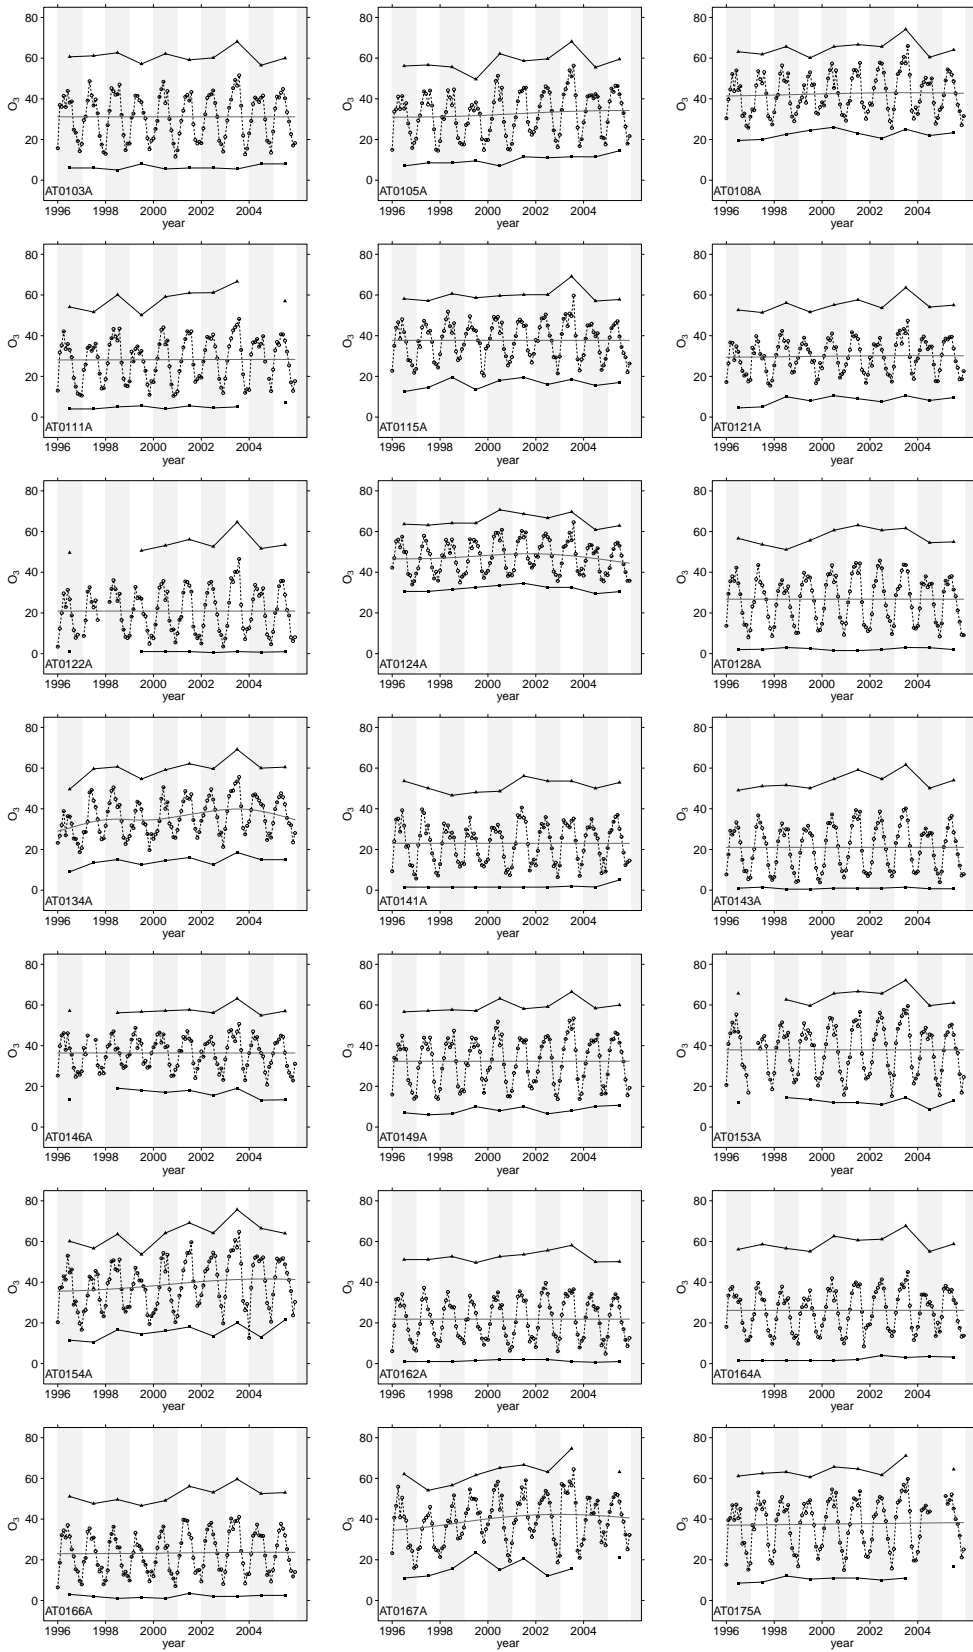

Figure A1: continued.  $O_3$  trends of monthly mean characterised by loess regression

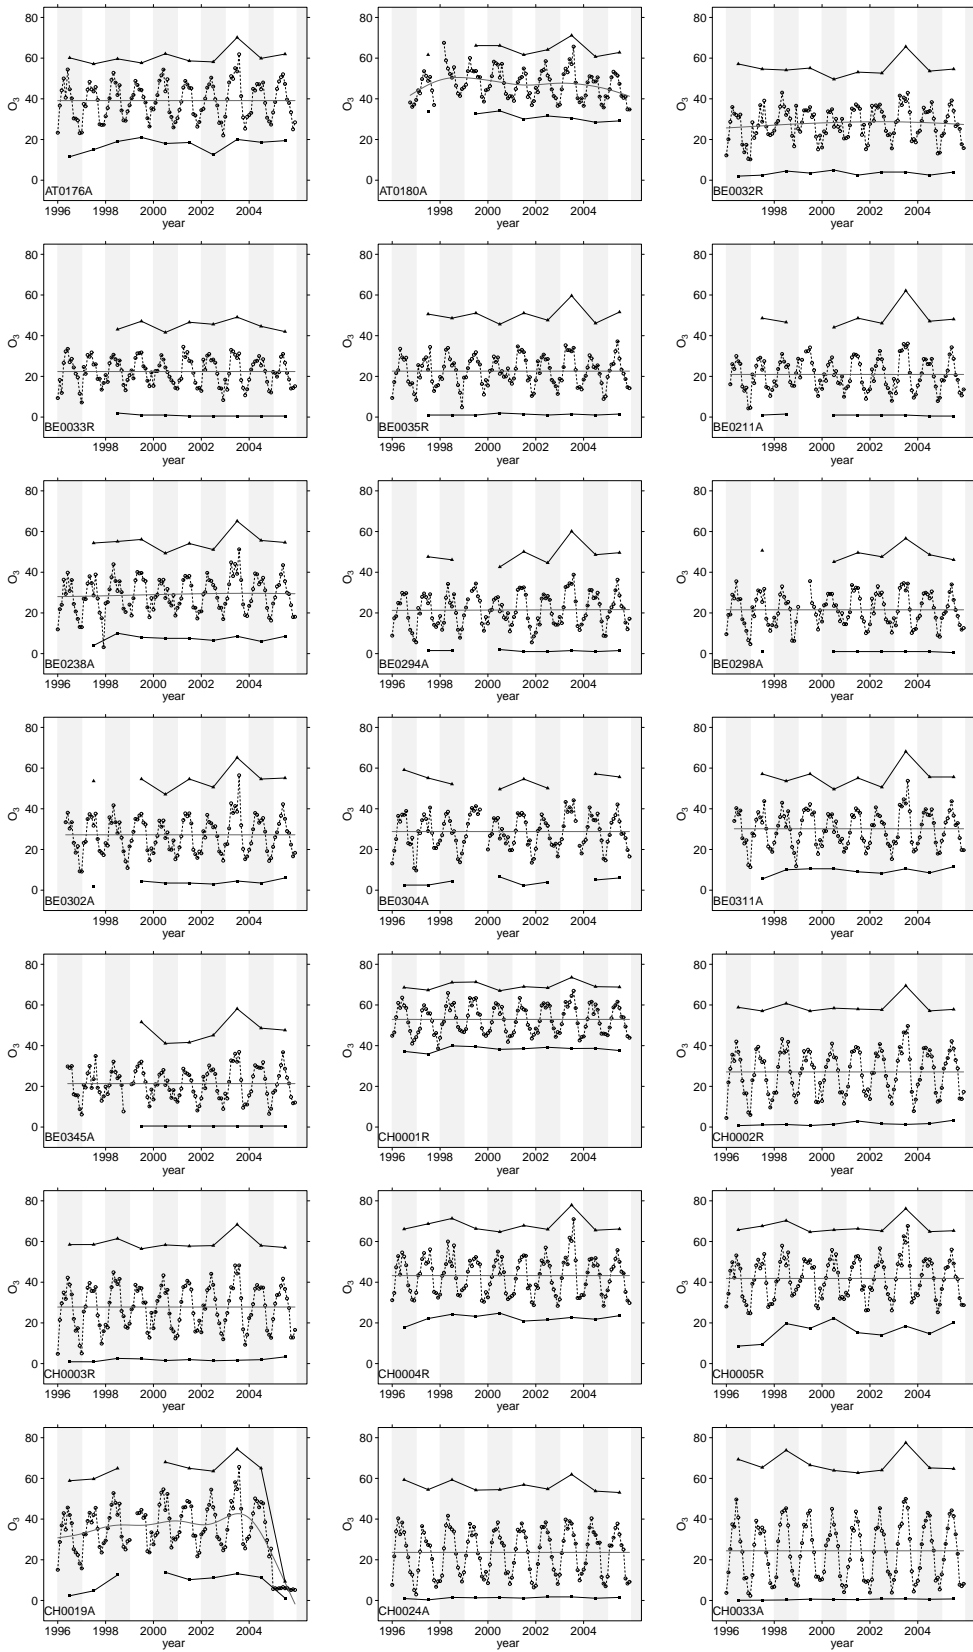

Figure A1: continued.  $O_3$  trends of monthly mean characterised by loess regression

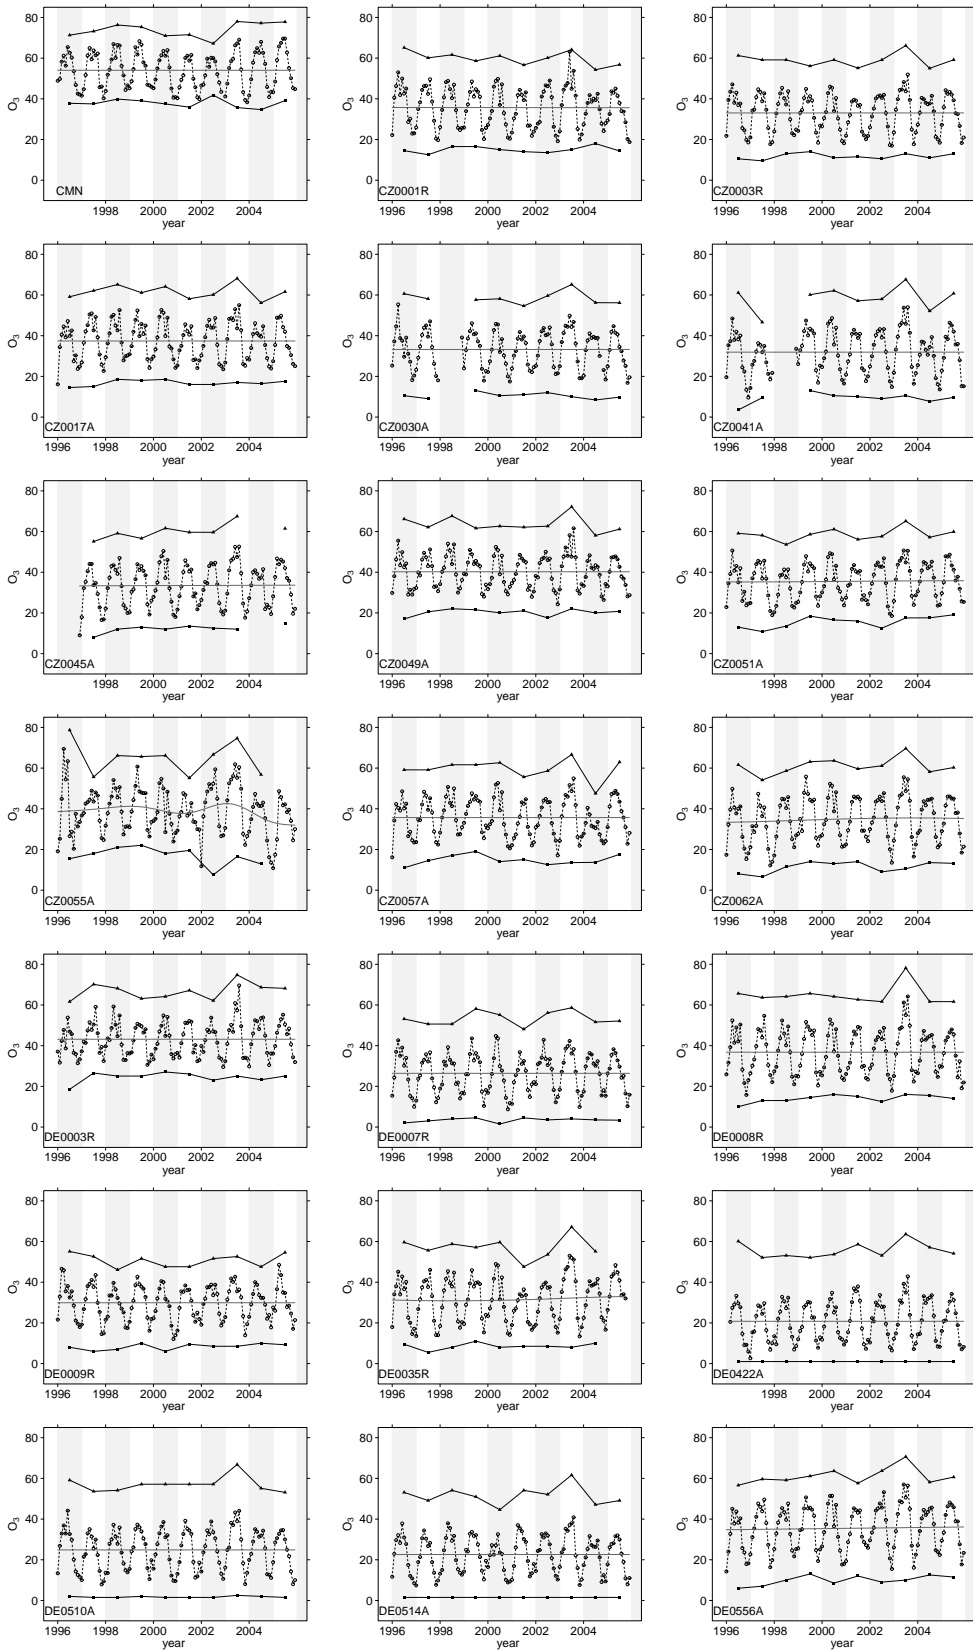

Figure A1: continued.  $O_3$  trends of monthly mean characterised by loess regression

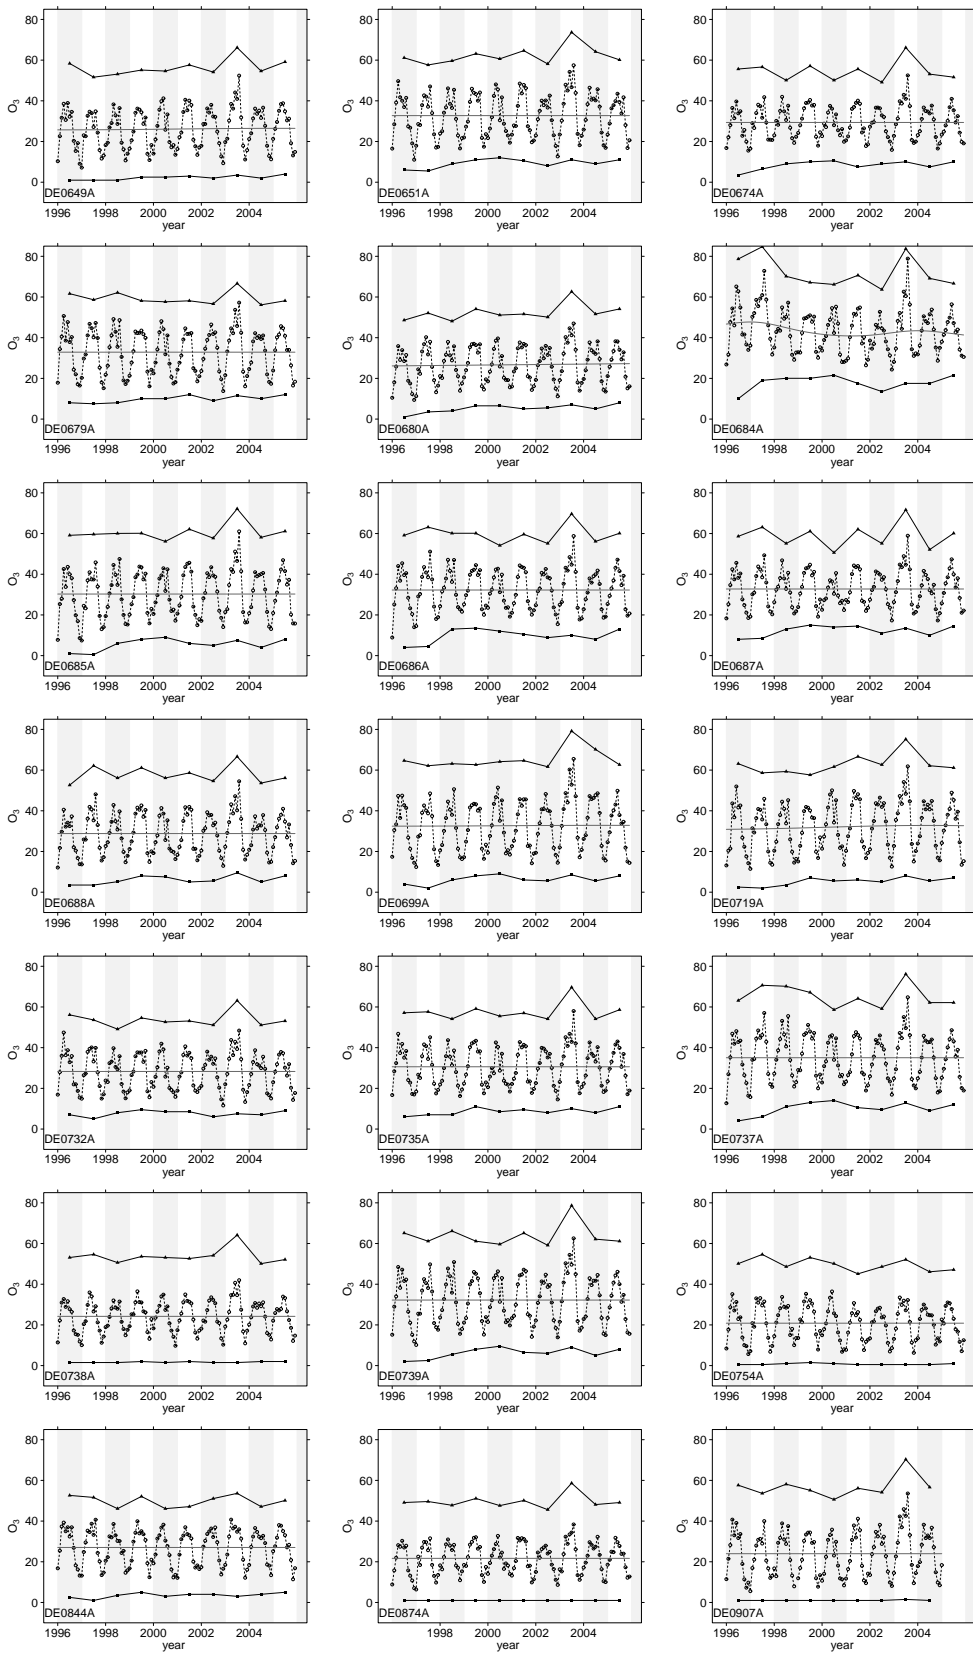

Figure A1: continued. O<sub>3</sub> trends of monthly mean characterised by loess regression

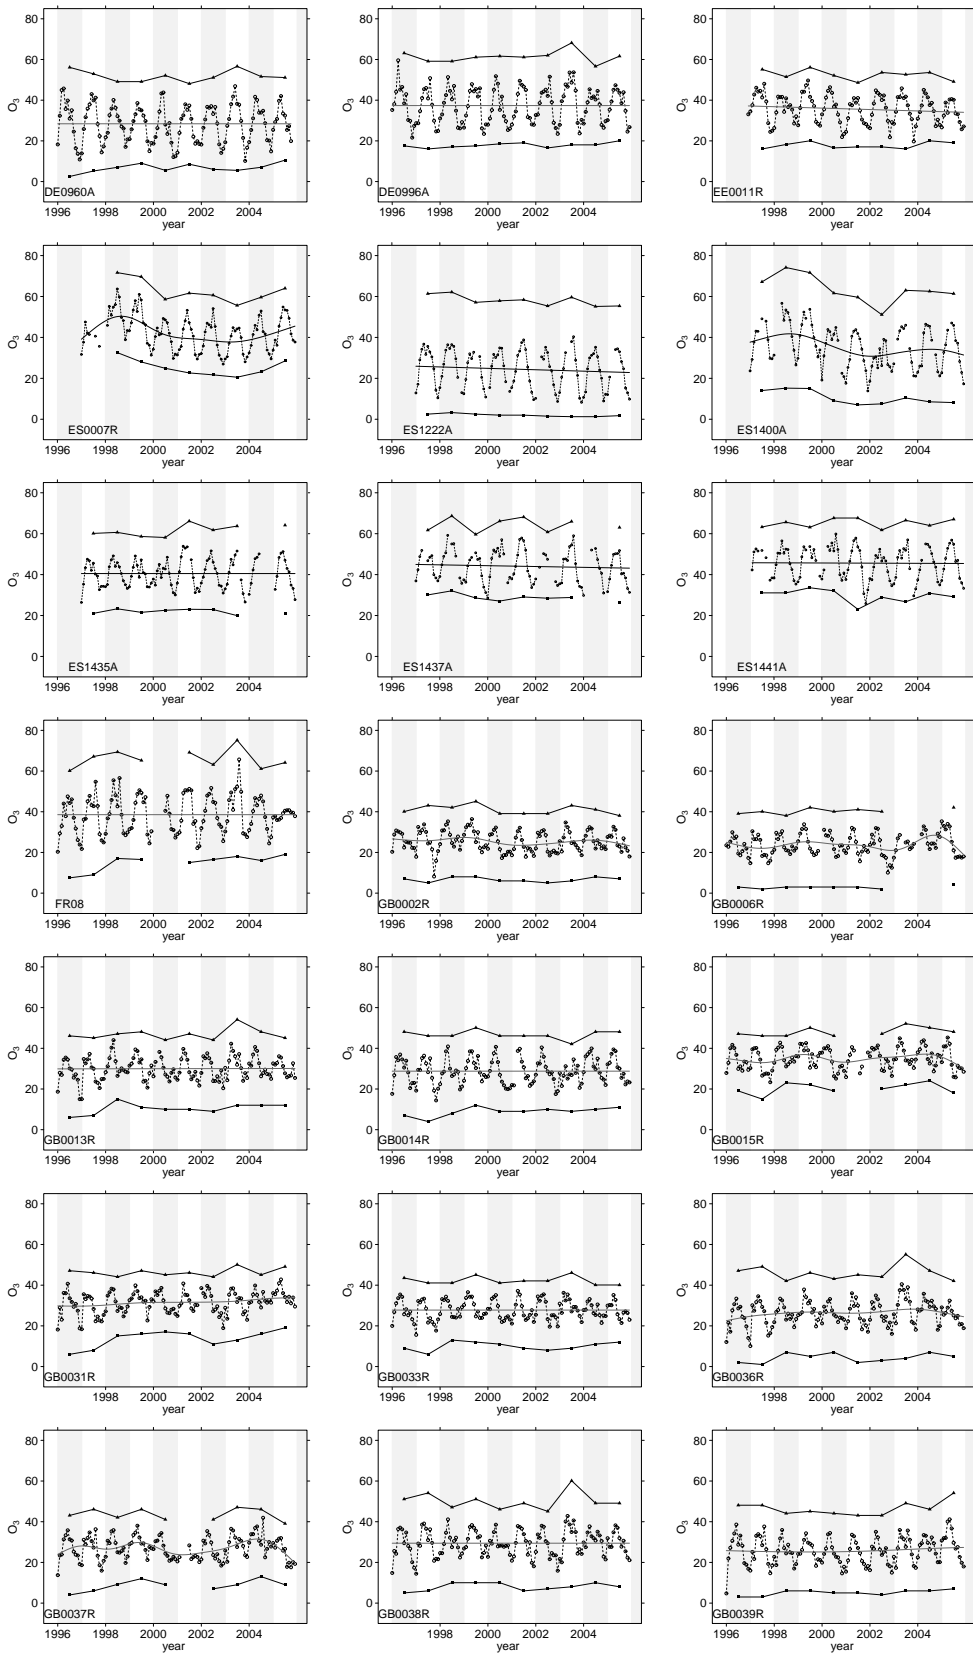

Figure A1: continued.  $O_3$  trends of monthly mean characterised by loess regression



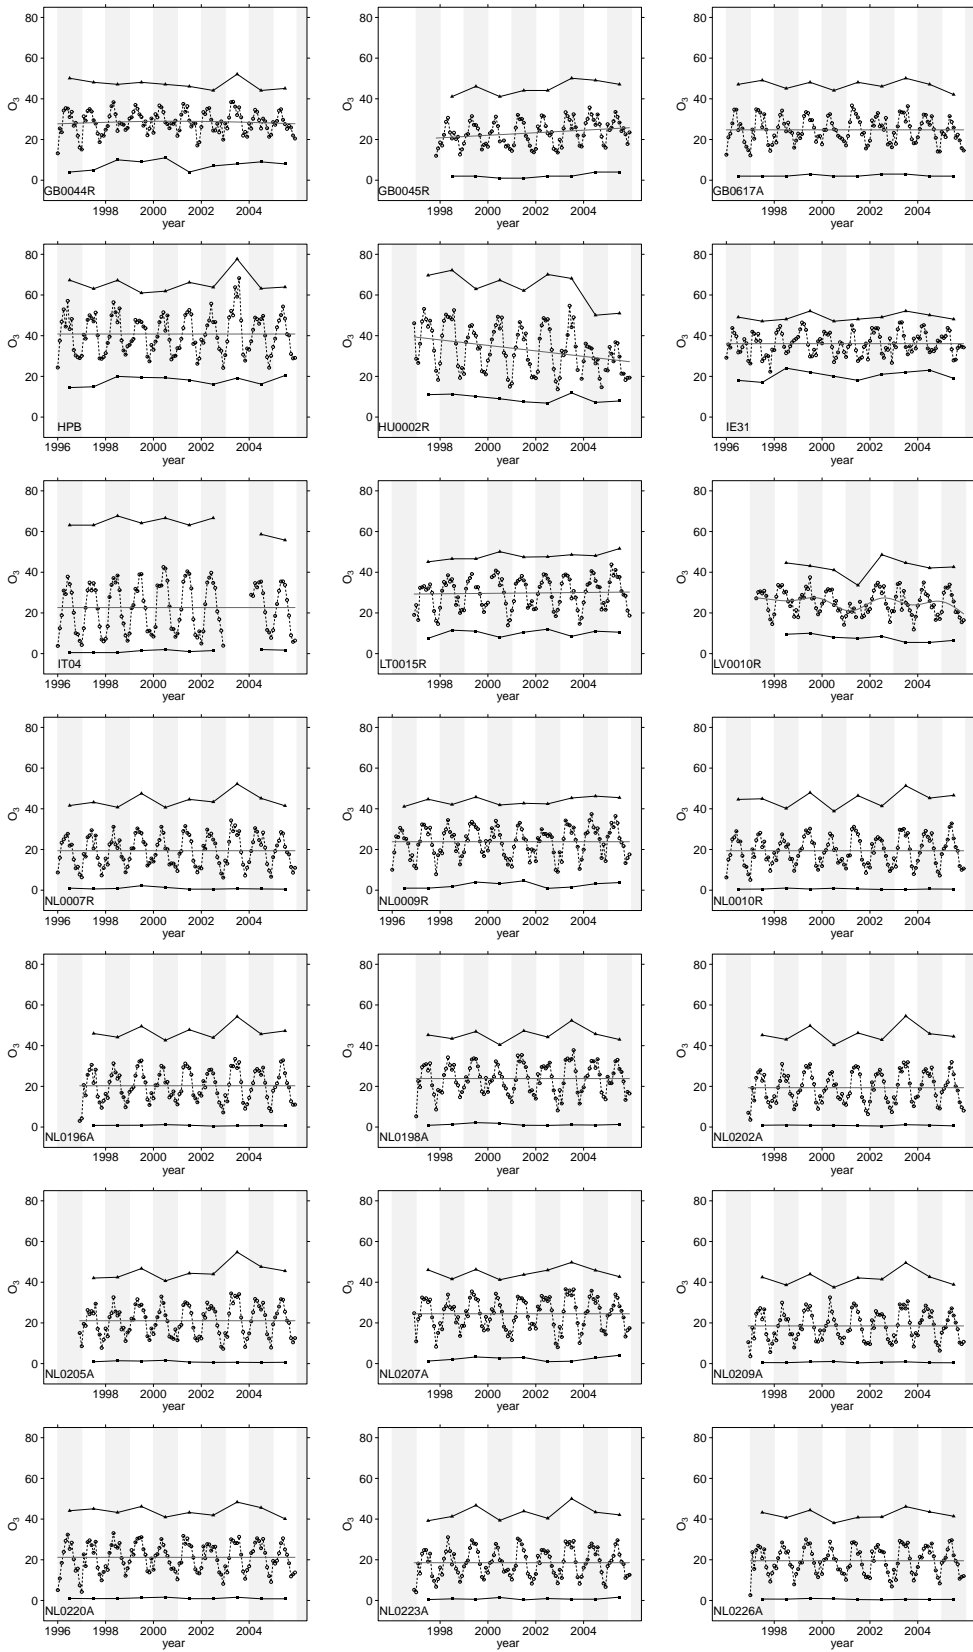

Figure A1: continued.  $O_3$  trends of monthly mean characterised by loess regression

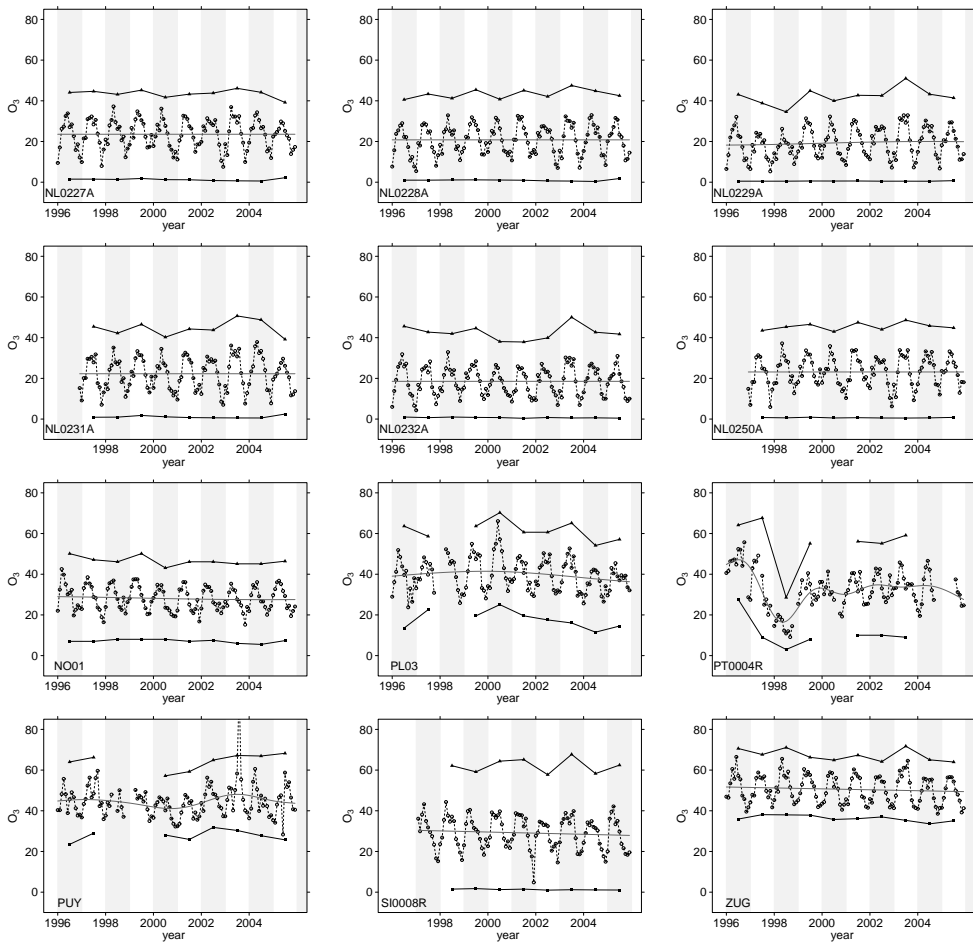

Figure A1: continued.  $O_3$  trends of monthly mean characterised by loess regression

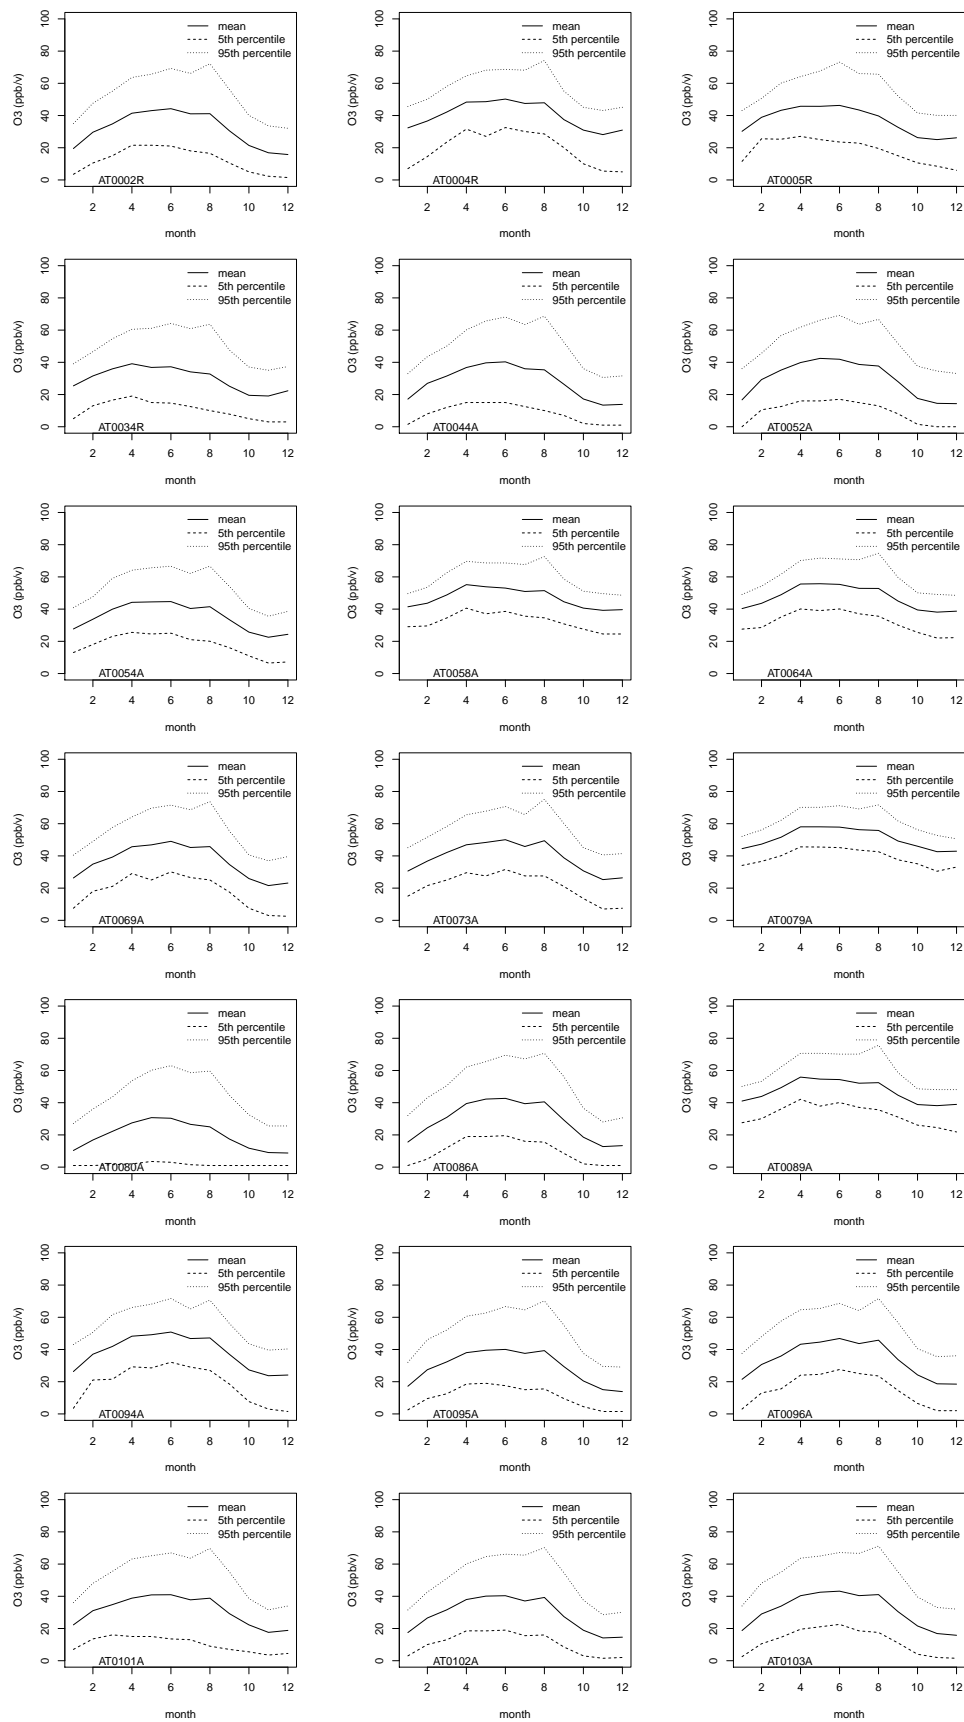

Figure A2: Seasonal cycles of O<sub>3</sub> (ppbv) for the period 1996-2005 inclusive

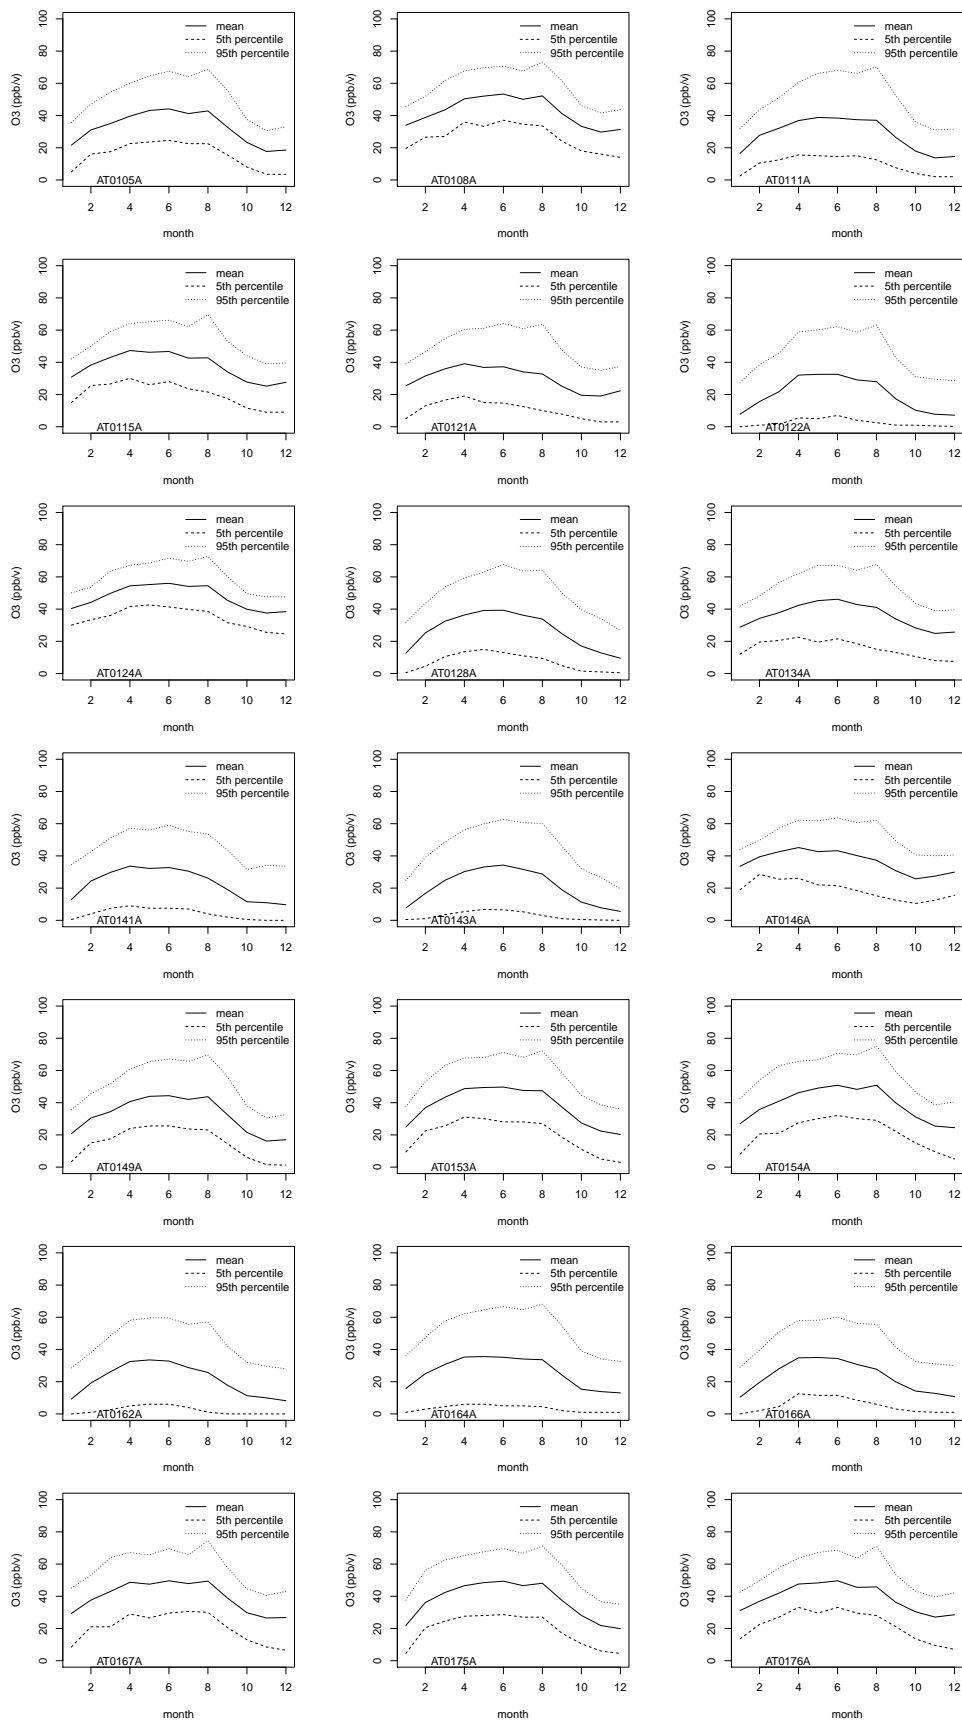

Figure A2: continued. Seasonal cycles of O<sub>3</sub> (ppbv) for the period 1996-2005 inclusive

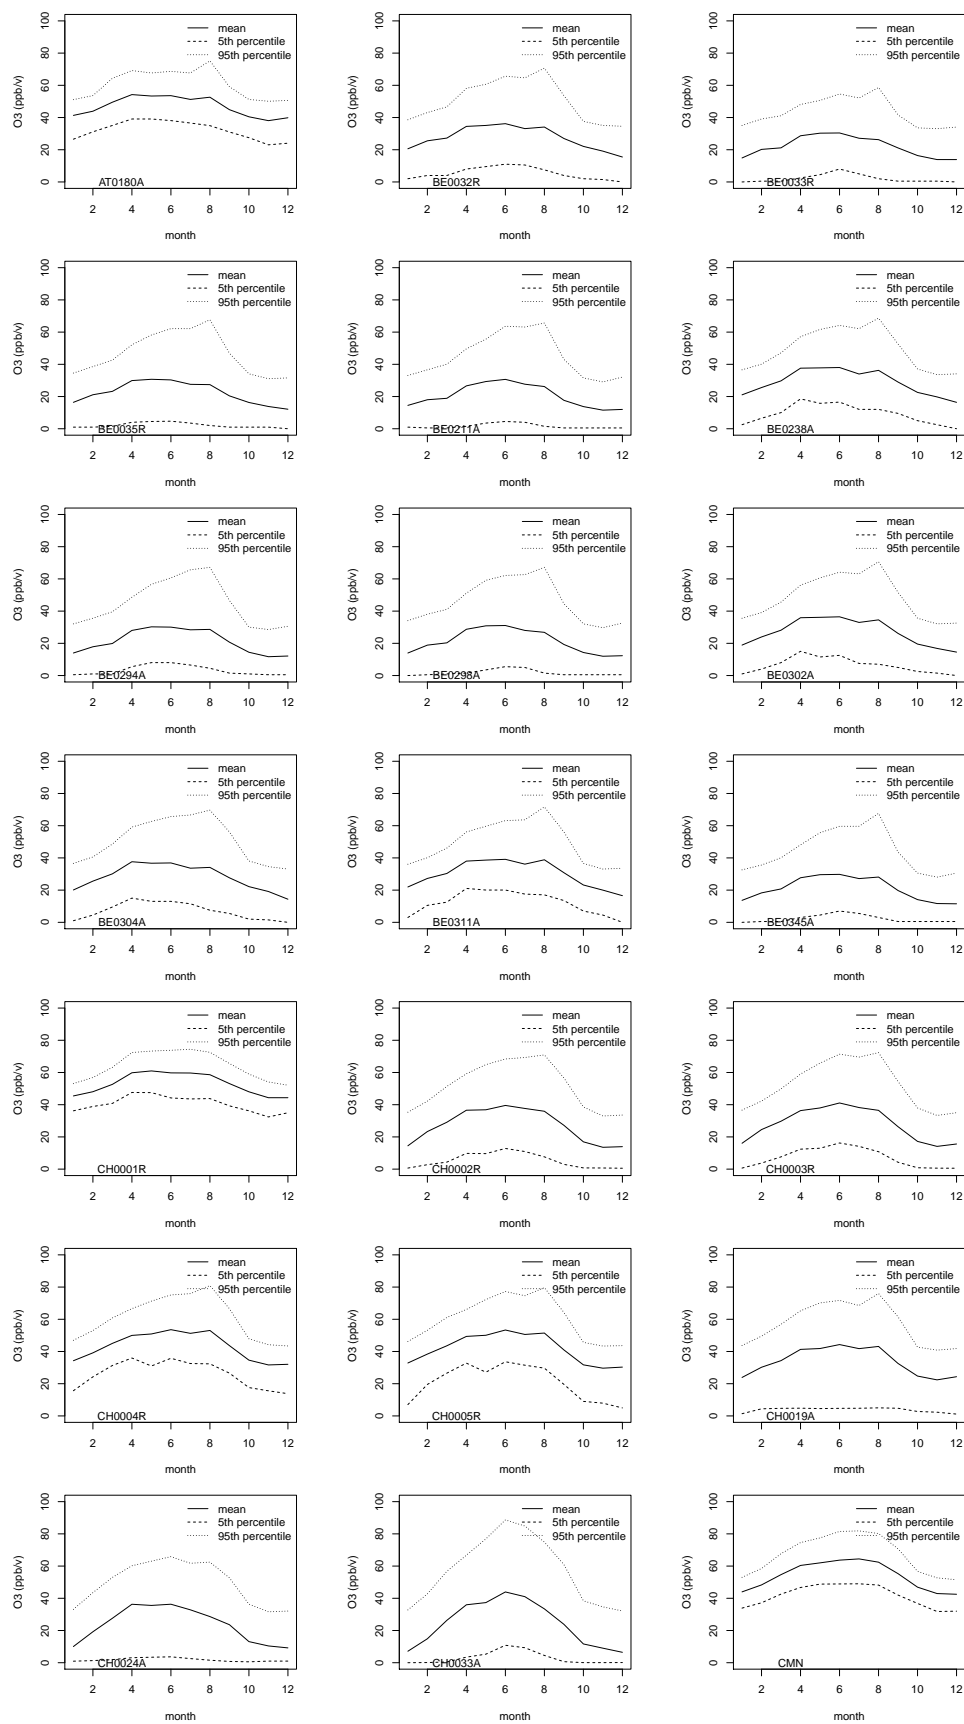

Figure A2: continued. Seasonal cycles of O<sub>3</sub> (ppbv) for the period 1996-2005 inclusive

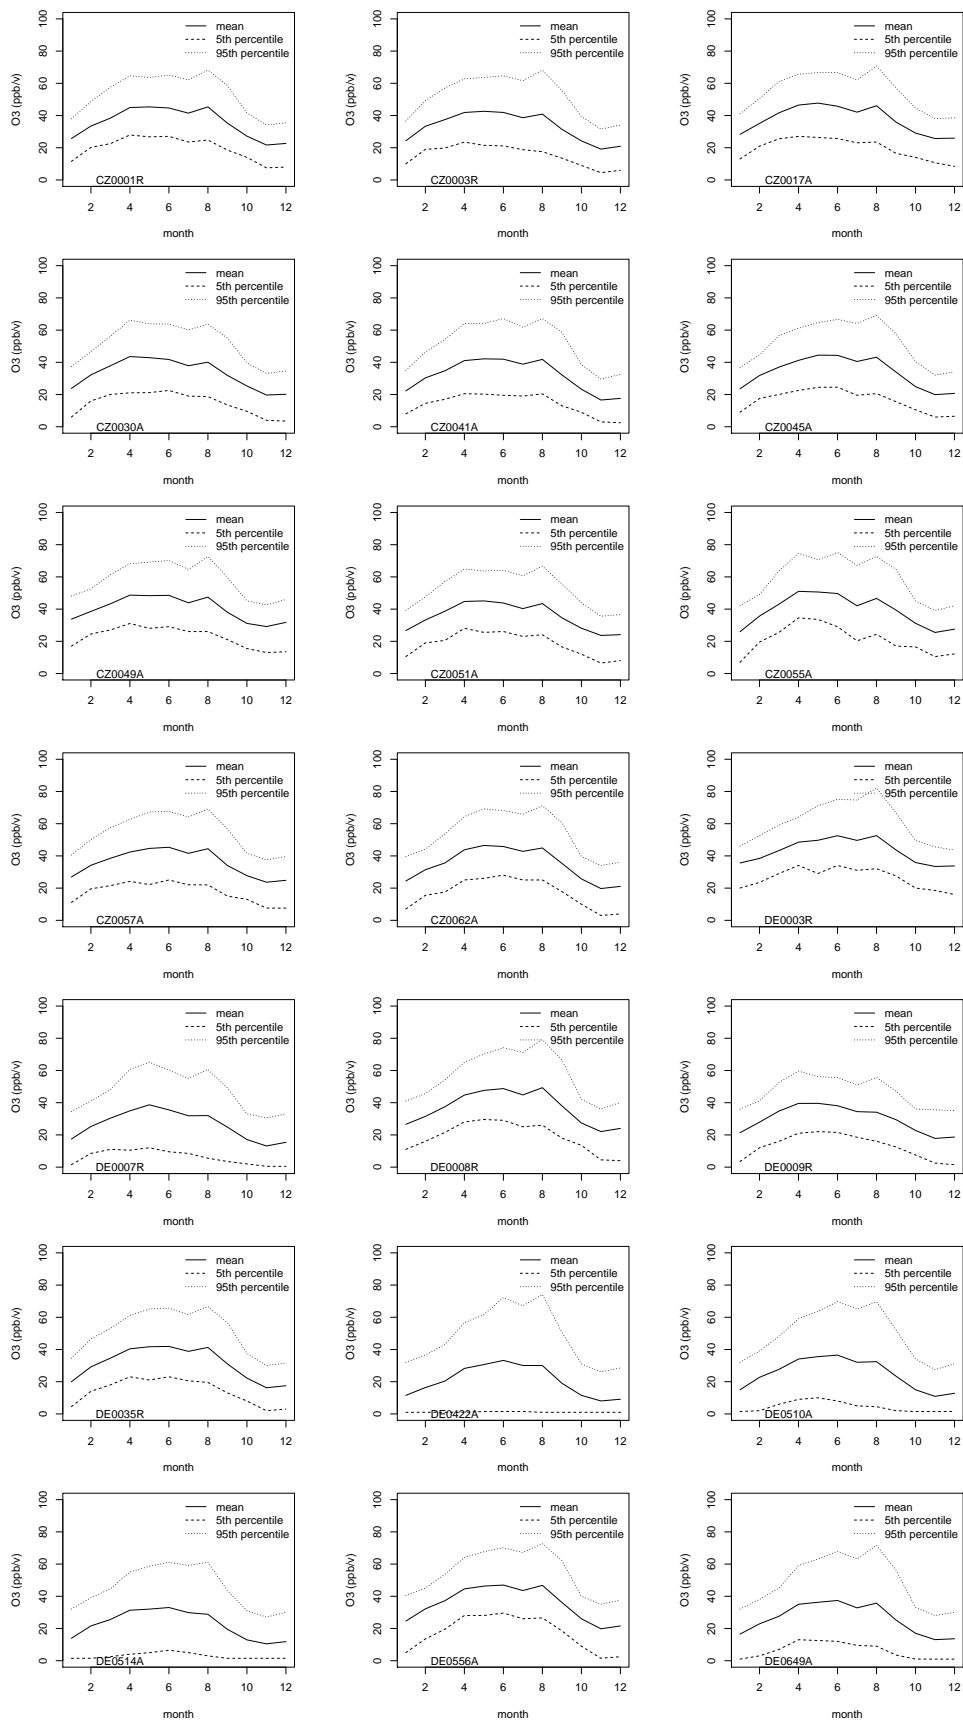

Figure A2: continued. Seasonal cycles of O<sub>3</sub> (ppbv) for the period 1996-2005 inclusive

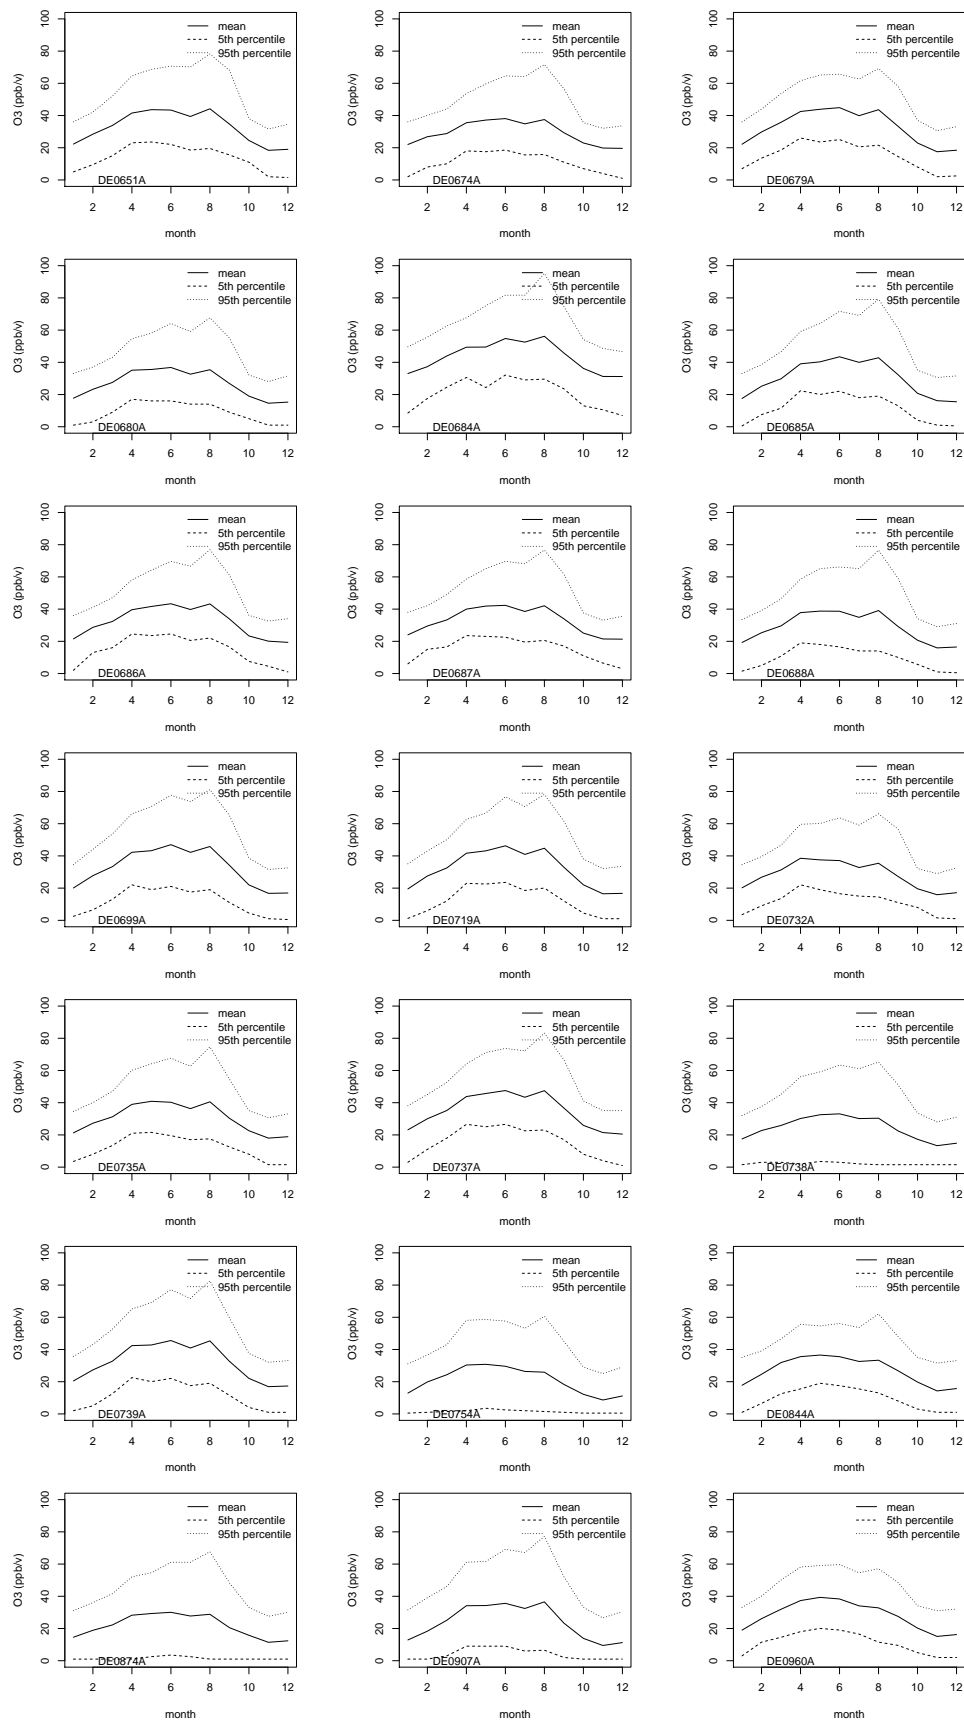

Figure A2: continued. Seasonal cycles of O<sub>3</sub> (ppbv) for the period 1996-2005 inclusive

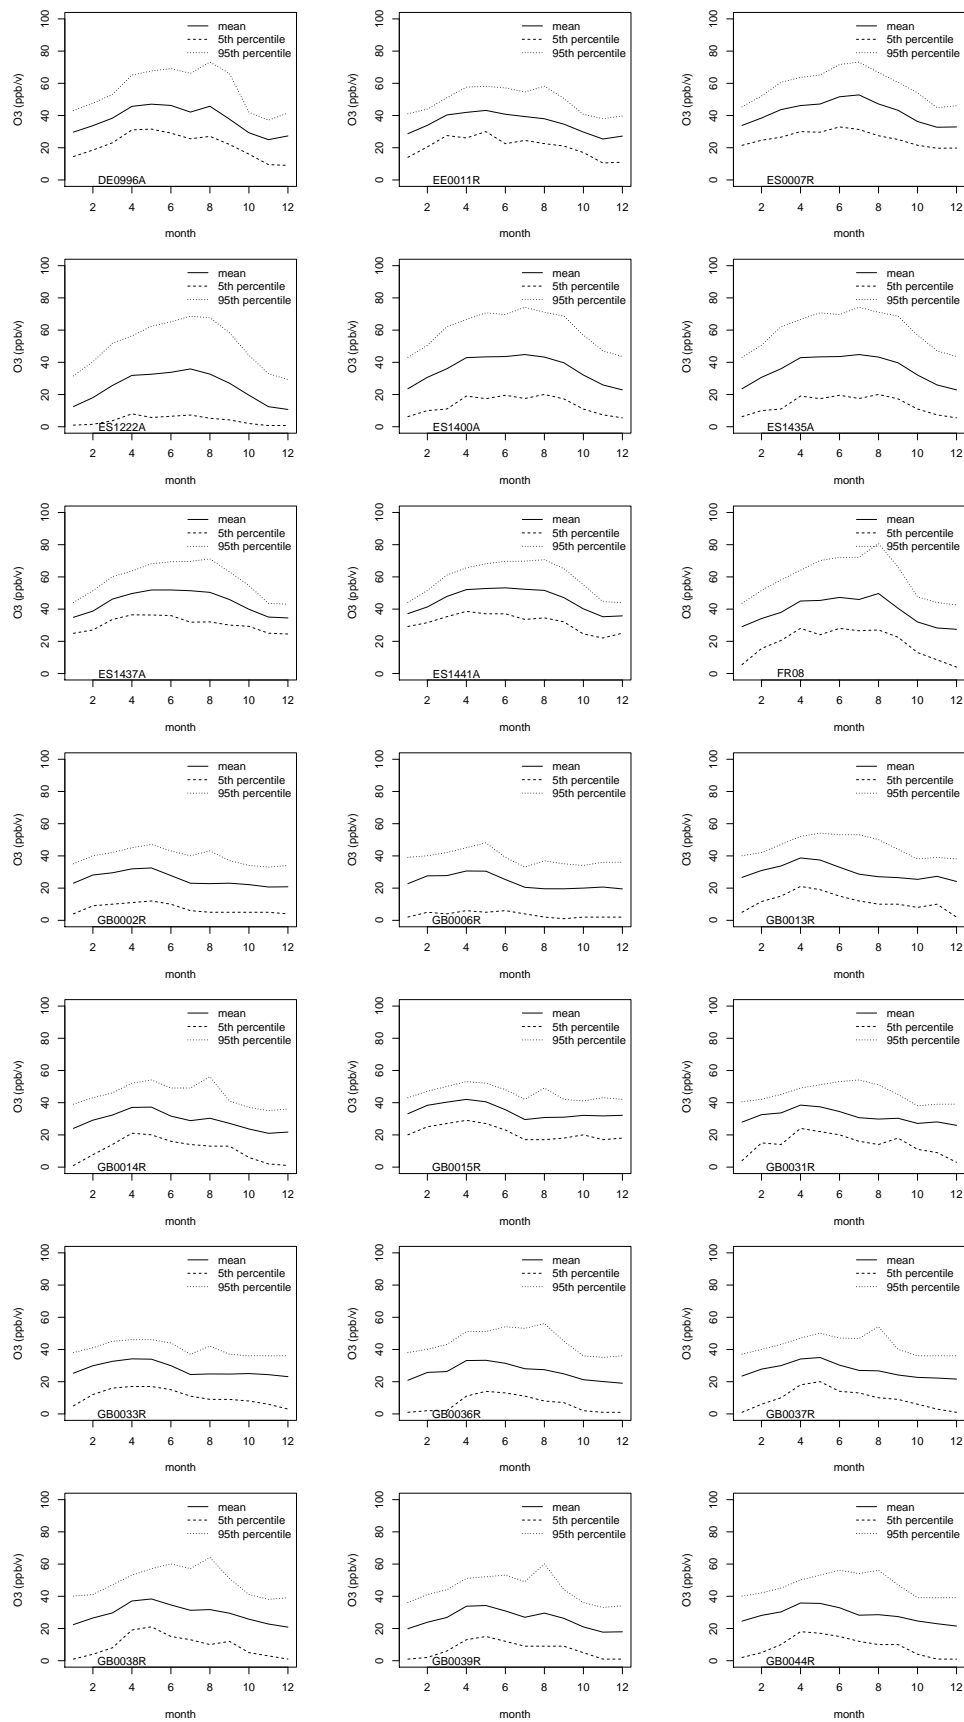

Figure A2: continued. Seasonal cycles of O<sub>3</sub> (ppbv) for the period 1996-2005 inclusive



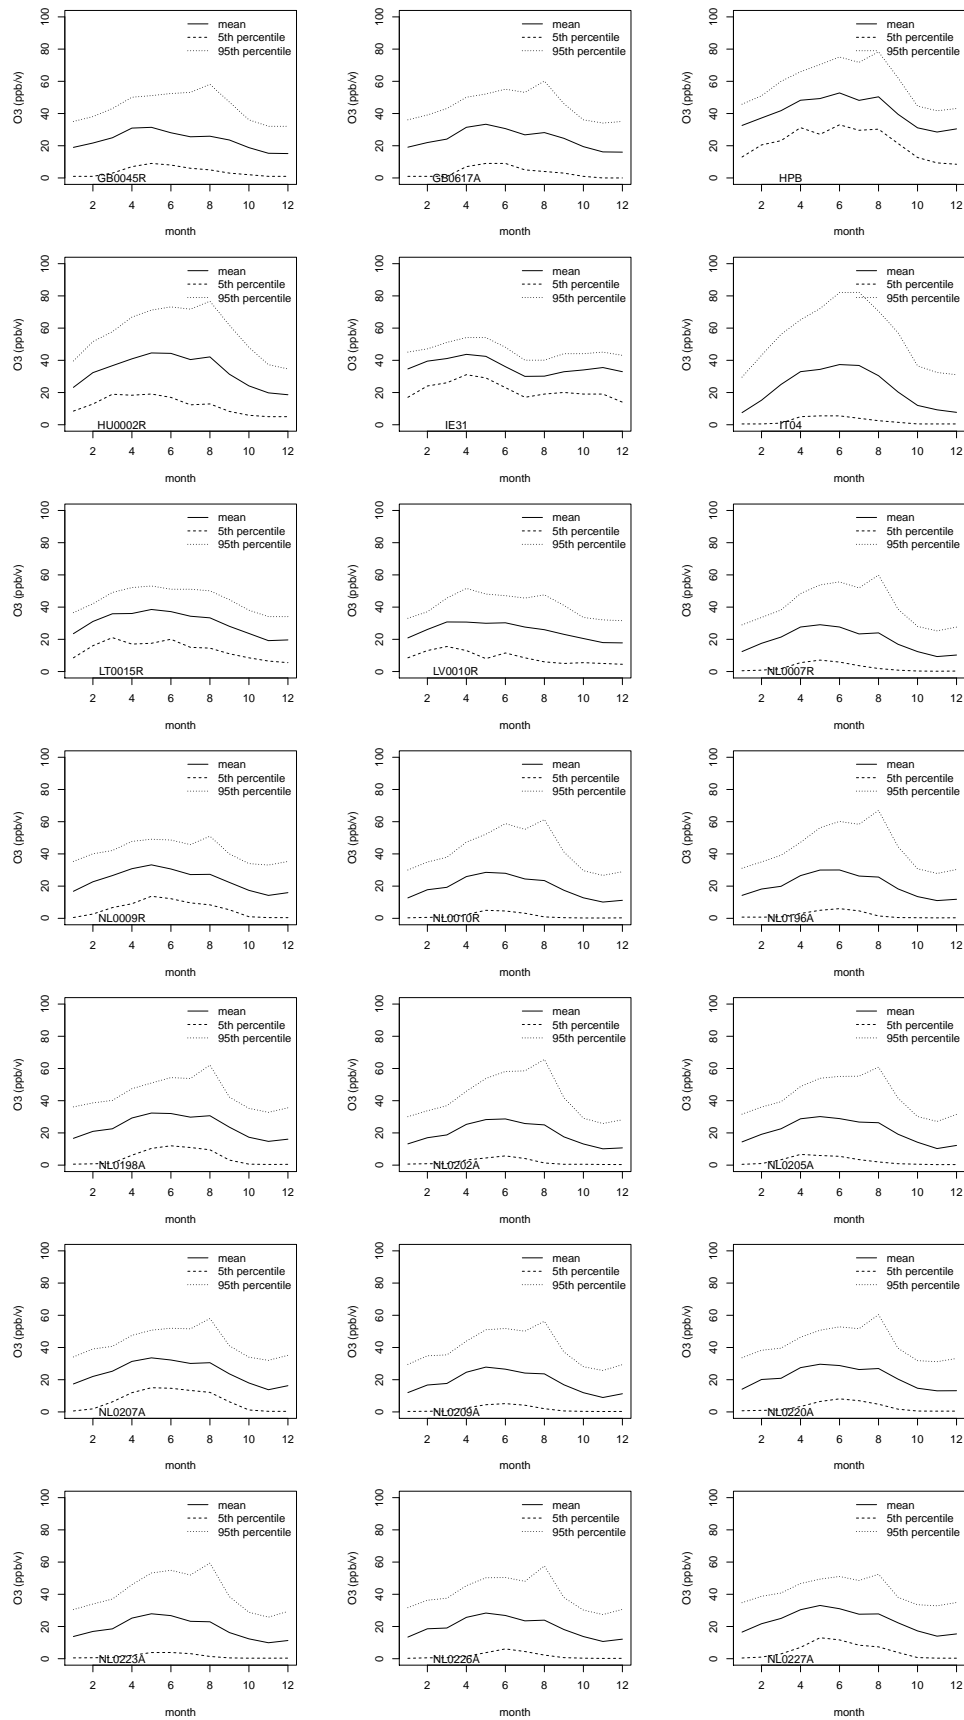

Figure A2: continued. Seasonal cycles of O<sub>3</sub> (ppbv) for the period 1996-2005 inclusive

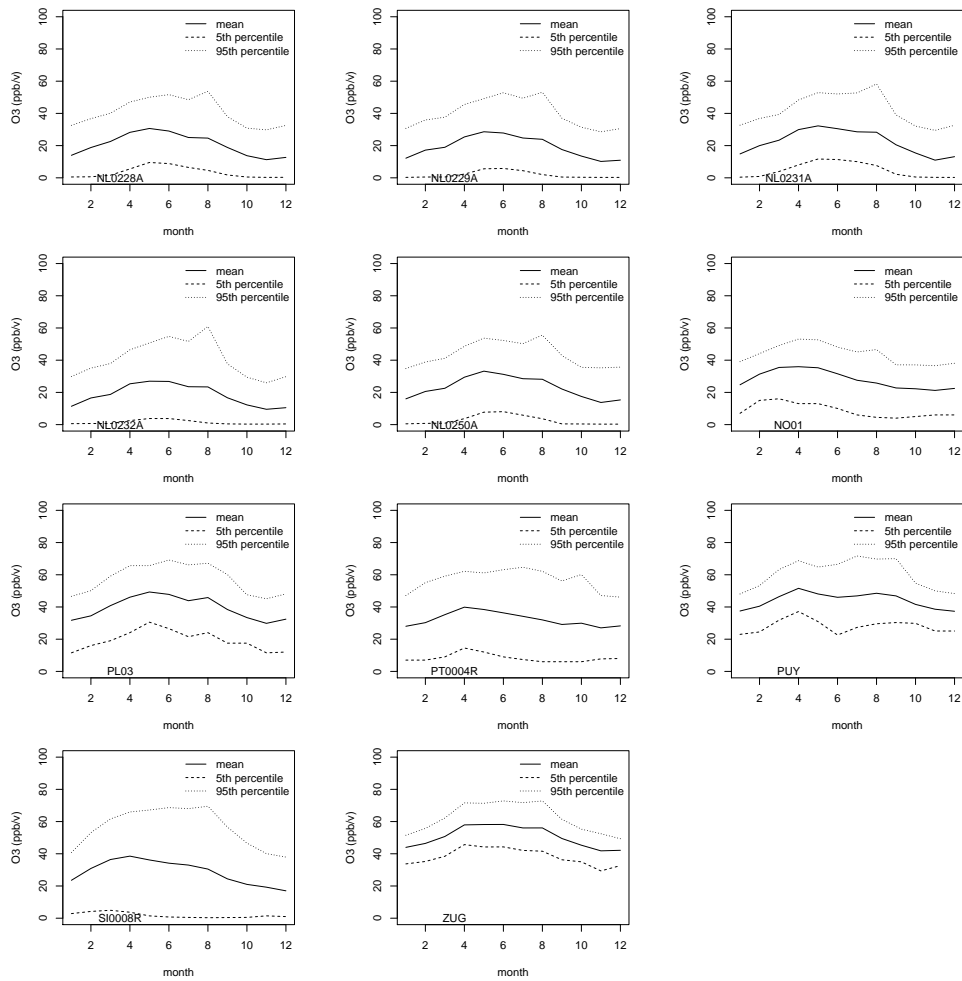

Figure A2: continued. Seasonal cycles of O<sub>3</sub> (ppbv) for the period 1996-2005 inclusive

Table A1: Characterisation and categorisation of monthly mean O<sub>3</sub> time series by loess smoothing. NT-no trend, P-positive trend, N-negative trend, I + D increasing then decreasing levels, D + I - decreasing then increasing levels, C - complex behaviour

| NT                              | P               | N       | I + D   | D + I   | C       |
|---------------------------------|-----------------|---------|---------|---------|---------|
| AT0002R BE0302A DE0674A NL0009R | AT0034R GB0045R | EE0011R | AT0058A | GB0039R | AT0134A |
| AT0004R BE0304A DE0679A NL0010R | AT0052A LT0015R | ES1222A | AT0064A |         | AT0180A |
| AT0005R BE0311A DE0685A NL0196A | AT0086A NL0229A | ES1437A | AT0124A |         | CH0019A |
| AT0044A BE0345A DE0686A NL0198A | AT0089A         | ES1441A | AT0167A |         | CZ0055A |
| AT0054A CH0001R DE0687A NL0202A | AT0095A         | HU0002R | BE0032R |         | DE0684A |
| AT0069A CH0002R DE0688A NL0205A | AT0096A         | NO01    | GB0036R |         | ES0007R |
| AT0073A CH0003R DE0732A NL0207A | AT0102A         | SI0008R | GB0044R |         | ES1400A |
| AT0079A CH0004R DE0735A NL0209A | AT0105A         | ZUG     | PL03    |         | GB0002R |
| AT0080A CH0005R DE0737A NL0220A | AT0108A         |         |         |         | GB0006R |
| AT0094A CH0024A DE0738A NL0223A | AT0111A         |         |         |         | GB0015R |
| AT0101A CH0033A DE0739A NL0226A | AT0121A         |         |         |         | GB0037R |
| AT0103A CMN DE0754A NL0227A     | AT0154A         |         |         |         | LV0010R |
| AT0115A CZ0001R DE0844A NL0228A | AT0166A         |         |         |         | PT0004R |
| AT0122A CZ0003R DE0874A NL0231A | AT0175A         |         |         |         | PUY     |
| AT0128A CZ0017A DE0907A NL0232A | BE0238A         |         |         |         |         |
| AT0141A CZ0030A DE0960A NL0250A | BE0294A         |         |         |         |         |
| AT0143A CZ0041A DE0996A         | CZ0045A         |         |         |         |         |
| AT0146A CZ0049A ES14356         | CZ0051A         |         |         |         |         |
| AT0149A CZ0057A FR08            | CZ0062A         |         |         |         |         |
| AT0153A DE0003R GB0014R         | DE0035R         |         |         |         |         |
| AT0162A DE0007R GB0033R         | DE0556A         |         |         |         |         |
| AT0164A DE0008R GB0038R         | DE0649A         |         |         |         |         |
| AT0176A DE0009R GB0617A         | DE0680A         |         |         |         |         |
| BE0033R DE0422A HPB             | DE0699A         |         |         |         |         |
| BE0035R DE0510A IE31            | DE0719A         |         |         |         |         |
| BE0211A DE0514A IT04            | GB0013R         |         |         |         |         |
| BE0298A DE0651A NL0007R         | GB0031R         |         |         |         |         |

Table A2: Quantification of trends (ppbv/yr and %/yr) in O<sub>3</sub> monthly mean 1996-2005. 95% confidence interval given in brackets. \*\*\* significant at 99.9% level, \*\* significant at 99.0% level, \* significant at 95.0% level, + significant at 90.0% level. † high altitude sites (>1000 m). ‡ 2σ error. ◊ significant trends only

| ID       | Trend (ppbv/yr)      | Sig. | p value | Trend (%/yr)         | Sig. | p value |
|----------|----------------------|------|---------|----------------------|------|---------|
| AT0002R  | 0.16 (-0.05 - 0.38)  |      | 0.125   | 0.73 (-0.06 - 1.60)  | +    | 0.073   |
| †AT0004R | 0.19 (-0.03 - 0.42)  | +    | 0.075   | 0.56 (-0.11 - 1.21)  | +    | 0.074   |
| †AT0005R | 0.28 ( 0.00 - 0.54)  | *    | 0.044   | 0.78 ( 0.03 - 1.66)  | *    | 0.040   |
| †AT0034R | 0.38 ( 0.18 - 0.61)  | ***  | <0.001  | 1.42 ( 0.57 - 2.47)  | **   | 0.001   |
| AT0044A  | -0.03 (-0.27 - 0.18) |      | 0.768   | 0.04 (-1.01 - 1.18)  |      | 0.949   |
| AT0052A  | 0.36 ( 0.13 - 0.62)  | **   | 0.004   | 1.74 ( 0.67 - 2.71)  | **   | 0.002   |
| AT0054A  | 0.19 ( 0.00 - 0.41)  | *    | 0.035   | 0.50 (-0.11 - 1.37)  |      | 0.101   |
| †AT0058A | 0.15 (-0.03 - 0.33)  | +    | 0.076   | 0.29 (-0.12 - 0.74)  |      | 0.110   |
| †AT0064A | 0.32 ( 0.10 - 0.57)  | **   | 0.002   | 0.73 ( 0.21 - 1.28)  | **   | 0.003   |
| AT0069A  | 0.07 (-0.16 - 0.32)  |      | 0.496   | 0.34 (-0.38 - 1.18)  |      | 0.312   |
| AT0073A  | -0.02 (-0.26 - 0.19) |      | 0.852   | -0.11 (-0.81 - 0.58) |      | 0.737   |
| †AT0079A | 0.16 ( 0.02 - 0.32)  | *    | 0.026   | 0.34 ( 0.04 - 0.69)  | *    | 0.033   |
| AT0080A  | 0.23 ( 0.06 - 0.44)  | *    | 0.011   | 2.61 ( 1.16 - 4.04)  | ***  | <0.001  |
| AT0086A  | 0.89 ( 0.64 - 1.16)  | ***  | <0.001  | 4.83 ( 3.56 - 6.21)  | ***  | <0.001  |
| †AT0089A | 0.17 ( 0.01 - 0.36)  | *    | 0.042   | 0.34 (-0.06 - 0.84)  | +    | 0.087   |
| AT0094A  | 0.28 (-0.01 - 0.71)  | +    | 0.072   | 0.74 (-0.21 - 2.01)  | +    | 0.100   |
| AT0095A  | 0.70 ( 0.51 - 0.92)  | ***  | <0.001  | 3.51 ( 2.58 - 4.55)  | ***  | <0.001  |
| AT0096A  | 0.53 ( 0.23 - 0.84)  | ***  | <0.001  | 2.04 ( 0.92 - 3.46)  | ***  | <0.001  |
| AT0101A  | 0.37 ( 0.17 - 0.58)  | ***  | <0.001  | 2.04 ( 1.23 - 2.87)  | ***  | <0.001  |
| AT0102A  | 0.65 ( 0.44 - 0.85)  | ***  | <0.001  | 2.90 ( 2.05 - 3.80)  | ***  | <0.001  |
| AT0103A  | 0.09 (-0.11 - 0.28)  |      | 0.404   | 0.39 (-0.38 - 1.14)  |      | 0.316   |
| AT0105A  | 0.69 ( 0.44 - 0.92)  | ***  | <0.001  | 2.68 ( 1.81 - 3.55)  | ***  | <0.001  |
| †AT0108A | 0.37 ( 0.10 - 0.64)  | **   | 0.004   | 0.96 ( 0.32 - 1.73)  | **   | 0.002   |
| AT0111A  | 0.41 ( 0.19 - 0.64)  | **   | 0.001   | 1.54 ( 0.51 - 2.69)  | **   | 0.003   |
| AT0115A  | 0.10 (-0.11 - 0.33)  |      | 0.297   | 0.26 (-0.36 - 0.93)  |      | 0.414   |
| AT0121A  | 0.38 ( 0.18 - 0.61)  | ***  | <0.001  | 1.42 ( 0.57 - 2.47)  | **   | 0.001   |
| AT0122A  | 0.31 ( 0.06 - 0.54)  | **   | 0.006   | 2.62 ( 0.69 - 4.39)  | **   | 0.002   |
| †AT0124A | 0.04 (-0.18 - 0.27)  |      | 0.670   | 0.08 (-0.42 - 0.60)  |      | 0.754   |
| AT0128A  | 0.13 (-0.09 - 0.39)  |      | 0.204   | 0.50 (-0.66 - 1.65)  |      | 0.320   |
| AT0134A  | 0.82 ( 0.50 - 1.09)  | ***  | <0.001  | 2.65 ( 1.72 - 3.60)  | ***  | <0.001  |
| AT0141A  | 0.32 ( 0.06 - 0.55)  | **   | 0.007   | 2.03 ( 0.65 - 3.58)  | **   | 0.002   |
| AT0143A  | 0.28 ( 0.12 - 0.47)  | ***  | <0.001  | 1.18 (-0.25 - 2.81)  | +    | 0.095   |
| †AT0146A | 0.02 (-0.16 - 0.25)  |      | 0.810   | 0.06 (-0.60 - 0.74)  |      | 0.828   |
| AT0149A  | 0.43 ( 0.26 - 0.62)  | ***  | <0.001  | 1.75 ( 0.95 - 2.57)  | ***  | <0.001  |
| AT0153A  | 0.18 (-0.09 - 0.51)  |      | 0.181   | 0.65 (-0.26 - 1.68)  |      | 0.126   |
| AT0154A  | 1.05 ( 0.73 - 1.36)  | ***  | <0.001  | 2.88 ( 2.04 - 3.66)  | ***  | <0.001  |
| AT0162A  | 0.16 (-0.03 - 0.37)  |      | 0.123   | 1.54 (-0.29 - 2.96)  | +    | 0.070   |
| AT0164A  | 0.39 ( 0.16 - 0.62)  | ***  | <0.001  | 3.35 ( 2.04 - 4.79)  | ***  | <0.001  |
| AT0166A  | 0.42 ( 0.25 - 0.63)  | ***  | <0.001  | 2.55 ( 1.29 - 3.90)  | ***  | <0.001  |
| AT0167A  | 0.98 ( 0.62 - 1.38)  | ***  | <0.001  | 2.25 ( 1.28 - 3.41)  | ***  | <0.001  |
| AT0175A  | 0.46 ( 0.17 - 0.75)  | ***  | <0.001  | 1.49 ( 0.64 - 2.46)  | ***  | <0.001  |
| AT0176A  | 0.31 ( 0.11 - 0.53)  | **   | 0.002   | 0.88 ( 0.36 - 1.46)  | **   | 0.001   |

Table A2: continued. Quantification of trends (ppbv/yr and %/yr) in O<sub>3</sub> monthly mean 1996-2005. 95% confidence interval given in brackets. \*\*\* significant at 99.9% level, \*\* significant at 99.0% level, \* significant at 95.0% level, + significant at 90.0% level. † high altitude sites (>1000 m). ‡ 2σ error. ◊ significant trends only

| ID       | Trend (ppbv/yr)       | Sig. | p value | Trend (%/yr)          | Sig. | p value |
|----------|-----------------------|------|---------|-----------------------|------|---------|
| †AT0180A | -0.42 (-0.69 - -0.13) | **   | 0.001   | -0.88 (-1.42 - -0.19) | **   | 0.006   |
| BE0032R  | 0.29 ( 0.05 - 0.54)   | *    | 0.017   | 1.46 ( 0.26 - 2.74)   | *    | 0.017   |
| BE0033R  | -0.35 (-0.50 - -0.18) | ***  | <0.001  | -3.18 (-4.63 - -1.86) | ***  | <0.001  |
| BE0035R  | 0.26 ( 0.05 - 0.49)   | *    | 0.013   | 1.55 ( 0.21 - 2.80)   | *    | 0.023   |
| BE0211A  | 0.07 (-0.14 - 0.27)   |      | 0.544   | -0.71 (-2.31 - 0.71)  |      | 0.357   |
| BE0238A  | 0.37 ( 0.22 - 0.56)   | ***  | <0.001  | 1.95 ( 1.27 - 2.83)   | ***  | <0.001  |
| BE0294A  | 0.04 (-0.18 - 0.30)   |      | 0.771   | 0.47 (-0.88 - 1.72)   |      | 0.532   |
| BE0298A  | 0.23 ( 0.00 - 0.45)   | *    | 0.039   | 0.40 (-1.47 - 1.91)   |      | 0.706   |
| BE0302A  | 0.28 ( 0.11 - 0.47)   | **   | 0.004   | 1.46 ( 0.62 - 2.37)   | **   | 0.001   |
| BE0304A  | 0.35 ( 0.10 - 0.60)   | **   | 0.005   | 1.60 ( 0.51 - 2.72)   | **   | 0.004   |
| BE0311A  | 0.01 (-0.16 - 0.20)   |      | 0.898   | 0.46 (-0.25 - 1.08)   |      | 0.249   |
| BE0345A  | -0.31 (-0.61 - -0.05) | *    | 0.016   | -3.23 (-5.11 - -1.41) | ***  | <0.001  |
| †CH0001R | 0.11 (-0.02 - 0.23)   | +    | 0.091   | 0.20 (-0.06 - 0.45)   |      | 0.124   |
| CH0002R  | 0.33 ( 0.16 - 0.55)   | ***  | <0.001  | 2.27 ( 1.29 - 3.54)   | ***  | <0.001  |
| CH0003R  | 0.16 (-0.03 - 0.38)   | +    | 0.099   | 0.94 (-0.08 - 2.24)   | +    | 0.075   |
| †CH0004R | -0.01 (-0.19 - 0.17)  |      | 0.949   | 0.04 (-0.43 - 0.48)   |      | 0.852   |
| †CH0005R | 0.24 ( 0.04 - 0.46)   | *    | 0.026   | 0.90 ( 0.33 - 1.59)   | **   | 0.007   |
| CH0019A  | 0.30 (-0.30 - 0.78)   |      | 0.165   | 1.05 (-0.88 - 2.46)   |      | 0.109   |
| CH0024A  | 0.19 ( 0.00 - 0.41)   | *    | 0.041   | 2.15 ( 0.84 - 3.96)   | **   | 0.002   |
| CH0033A  | 0.03 (-0.12 - 0.19)   |      | 0.715   | 2.54 ( 1.21 - 4.30)   | **   | 0.001   |
| †CMN     | 0.08 (-0.15 - 0.28)   |      | 0.460   | 0.10 (-0.31 - 0.47)   |      | 0.574   |
| CZ0001R  | -0.25 (-0.48 - -0.02) | *    | 0.031   | -0.73 (-1.39 - 0.04)  | *    | 0.036   |
| CZ0003R  | 0.09 (-0.10 - 0.30)   |      | 0.284   | 0.43 (-0.27 - 1.20)   |      | 0.198   |
| CZ0017A  | -0.10 (-0.28 - 0.09)  |      | 0.271   | -0.17 (-0.73 - 0.50)  |      | 0.647   |
| CZ0030A  | 0.13 (-0.13 - 0.38)   |      | 0.295   | 0.42 (-0.63 - 1.39)   |      | 0.348   |
| CZ0041A  | 0.40 ( 0.01 - 0.78)   | *    | 0.034   | 1.38 ( 0.13 - 2.63)   | *    | 0.030   |
| CZ0045A  | 0.44 ( 0.22 - 0.68)   | ***  | <0.001  | 1.60 ( 0.82 - 2.46)   | ***  | <0.001  |
| †CZ0049A | -0.06 (-0.27 - 0.13)  |      | 0.517   | -0.12 (-0.67 - 0.42)  |      | 0.650   |
| CZ0051A  | 0.37 ( 0.17 - 0.60)   | ***  | <0.001  | 1.37 ( 0.68 - 2.24)   | ***  | <0.001  |
| †CZ0055A | -0.58 (-1.07 - -0.12) | **   | 0.005   | -1.66 (-3.12 - -0.32) | **   | 0.004   |
| CZ0057A  | 0.04 (-0.22 - 0.30)   |      | 0.734   | 0.09 (-0.76 - 0.86)   |      | 0.789   |
| CZ0062A  | 0.53 ( 0.27 - 0.81)   | ***  | <0.001  | 1.72 ( 0.88 - 2.66)   | ***  | <0.001  |
| †DE0003R | 0.25 ( 0.01 - 0.44)   | *    | 0.021   | 0.59 ( 0.02 - 1.11)   | *    | 0.017   |
| DE0007R  | 0.15 (-0.05 - 0.37)   |      | 0.202   | 0.52 (-0.52 - 1.57)   |      | 0.384   |
| DE0008R  | 0.23 (-0.02 - 0.47)   | *    | 0.047   | 0.88 (-0.02 - 1.68)   | *    | 0.030   |
| DE0009R  | 0.10 (-0.09 - 0.29)   |      | 0.314   | 0.60 (-0.26 - 1.34)   |      | 0.132   |
| DE0035R  | 0.33 ( 0.08 - 0.59)   | *    | 0.013   | 1.63 ( 0.57 - 2.74)   | **   | 0.002   |
| DE0422A  | 0.31 ( 0.14 - 0.51)   | ***  | <0.001  | 1.66 ( 0.27 - 3.24)   | *    | 0.013   |
| DE0510A  | 0.13 (-0.06 - 0.36)   |      | 0.148   | 0.69 (-0.47 - 2.09)   |      | 0.211   |
| DE0514A  | 0.10 (-0.07 - 0.27)   |      | 0.334   | 0.91 (-0.23 - 1.96)   |      | 0.125   |
| DE0556A  | 0.51 ( 0.30 - 0.72)   | ***  | <0.001  | 1.80 ( 1.18 - 2.65)   | ***  | <0.001  |
| DE0649A  | 0.43 ( 0.24 - 0.63)   | ***  | <0.001  | 2.52 ( 1.58 - 3.38)   | ***  | <0.001  |

Table A2: continued. Quantification of trends (ppbv/yr and %/yr) in O<sub>3</sub> monthly mean 1996-2005. 95% confidence interval given in brackets. \*\*\* significant at 99.9% level, \*\* significant at 99.0% level, \* significant at 95.0% level, + significant at 90.0% level. † high altitude sites (>1000 m). ‡ 2σ error. ◊ significant trends only

| ID       | Trend (ppbv/yr)       | Sig. | p value | Trend (%/yr)          | Sig. | p value |
|----------|-----------------------|------|---------|-----------------------|------|---------|
| DE0651A  | 0.29 ( 0.09 - 0.53)   | *    | 0.011   | 1.30 ( 0.62 - 2.10)   | **   | 0.001   |
| DE0674A  | 0.09 (-0.06 - 0.33)   |      | 0.244   | 0.81 ( 0.03 - 1.65)   | +    | 0.051   |
| DE0679A  | 0.11 (-0.08 - 0.33)   |      | 0.247   | 0.70 (-0.17 - 1.52)   | +    | 0.075   |
| DE0680A  | 0.38 ( 0.20 - 0.61)   | ***  | <0.001  | 1.96 ( 1.10 - 3.05)   | ***  | <0.001  |
| DE0684A  | -0.46 (-0.84 - -0.06) | *    | 0.012   | -1.03 (-2.03 - -0.08) | *    | 0.018   |
| DE0685A  | 0.30 ( 0.14 - 0.54)   | ***  | <0.001  | 1.60 ( 0.88 - 2.50)   | ***  | <0.001  |
| DE0686A  | 0.04 (-0.12 - 0.26)   |      | 0.552   | 0.27 (-0.46 - 0.99)   |      | 0.488   |
| DE0687A  | 0.16 (-0.02 - 0.39)   | +    | 0.070   | 0.74 ( 0.09 - 1.53)   | *    | 0.014   |
| DE0688A  | 0.16 (-0.05 - 0.39)   |      | 0.140   | 1.12 ( 0.26 - 2.17)   | *    | 0.011   |
| DE0699A  | 0.44 ( 0.19 - 0.71)   | ***  | <0.001  | 1.88 ( 0.94 - 2.89)   | ***  | <0.001  |
| DE0719A  | 0.54 ( 0.31 - 0.80)   | ***  | <0.001  | 2.44 ( 1.58 - 3.42)   | ***  | <0.001  |
| DE0732A  | 0.03 (-0.16 - 0.23)   |      | 0.806   | 0.49 (-0.36 - 1.43)   |      | 0.261   |
| DE0735A  | 0.31 ( 0.13 - 0.51)   | ***  | <0.001  | 1.45 ( 0.70 - 2.11)   | ***  | <0.001  |
| DE0737A  | -0.15 (-0.32 - 0.05)  |      | 0.107   | 0.03 (-0.66 - 0.75)   |      | 0.949   |
| DE0738A  | 0.25 ( 0.08 - 0.42)   | **   | 0.003   | 1.79 ( 0.76 - 2.73)   | ***  | <0.001  |
| DE0739A  | 0.22 ( 0.01 - 0.43)   | *    | 0.038   | 1.28 ( 0.48 - 2.13)   | **   | 0.002   |
| DE0754A  | -0.06 (-0.25 - 0.16)  |      | 0.627   | 0.59 (-0.94 - 2.10)   |      | 0.441   |
| DE0844A  | 0.11 (-0.06 - 0.25)   |      | 0.226   | 0.70 (-0.03 - 1.34)   | +    | 0.067   |
| DE0874A  | 0.23 ( 0.05 - 0.41)   | **   | 0.009   | 2.16 ( 1.04 - 3.28)   | ***  | <0.001  |
| DE0907A  | 0.44 ( 0.16 - 0.72)   | **   | 0.003   | 2.49 ( 1.07 - 3.89)   | **   | 0.002   |
| DE0960A  | 0.07 (-0.14 - 0.29)   |      | 0.525   | 0.15 (-0.77 - 1.09)   |      | 0.764   |
| DE0996A  | 0.20 ( 0.01 - 0.40)   | *    | 0.042   | 0.65 ( 0.08 - 1.26)   | *    | 0.022   |
| EE0011R  | -0.38 (-0.57 - -0.17) | ***  | <0.001  | -1.15 (-1.79 - -0.52) | ***  | <0.001  |
| †ES0007R | -0.54 (-1.09 - -0.03) | *    | 0.017   | -1.48 (-2.96 - -0.19) | *    | 0.010   |
| ES1222A  | -0.38 (-0.54 - -0.25) | ***  | <0.001  | -2.55 (-3.85 - -1.58) | ***  | <0.001  |
| ES1400A  | -1.02 (-1.36 - -0.63) | ***  | <0.001  | -3.27 (-4.49 - -2.17) | ***  | <0.001  |
| †ES1435A | 0.10 (-0.07 - 0.33)   |      | 0.263   | 0.22 (-0.28 - 0.74)   |      | 0.378   |
| †ES1437A | -0.54 (-0.75 - -0.35) | ***  | <0.001  | -1.39 (-1.88 - -0.94) | ***  | <0.001  |
| †ES1441A | -0.19 (-0.37 - -0.03) | *    | 0.041   | -0.45 (-0.89 - -0.06) | *    | 0.036   |
| FR08     | 0.29 (-0.01 - 0.58)   | *    | 0.036   | 0.95 ( 0.14 - 1.99)   | *    | 0.024   |
| GB0002R  | -0.12 (-0.28 - 0.04)  |      | 0.198   | -0.24 (-1.03 - 0.51)  |      | 0.540   |
| GB0006R  | 0.26 ( 0.02 - 0.50)   | *    | 0.015   | 1.72 ( 0.43 - 2.87)   | **   | 0.002   |
| GB0013R  | 0.18 ( 0.01 - 0.36)   | +    | 0.071   | 0.70 (-0.06 - 1.43)   | +    | 0.075   |
| GB0014R  | 0.21 ( 0.01 - 0.40)   | *    | 0.039   | 1.15 ( 0.29 - 1.94)   | **   | 0.006   |
| GB0015R  | 0.23 ( 0.04 - 0.44)   | *    | 0.019   | 0.60 ( 0.02 - 1.27)   | *    | 0.045   |
| GB0031R  | 0.43 ( 0.21 - 0.67)   | ***  | <0.001  | 1.59 ( 0.81 - 2.46)   | ***  | <0.001  |
| GB0033R  | 0.07 (-0.09 - 0.24)   |      | 0.404   | 0.48 (-0.19 - 1.24)   |      | 0.132   |
| GB0036R  | 0.21 (-0.01 - 0.49)   | +    | 0.060   | 1.52 ( 0.39 - 2.84)   | **   | 0.009   |
| GB0037R  | 0.14 (-0.14 - 0.40)   |      | 0.314   | 0.90 (-0.20 - 1.89)   |      | 0.101   |
| GB0038R  | 0.20 ( 0.00 - 0.42)   | +    | 0.078   | 0.95 ( 0.11 - 1.89)   | *    | 0.044   |
| GB0039R  | 0.30 ( 0.07 - 0.49)   | **   | 0.006   | 1.41 ( 0.45 - 2.40)   | **   | 0.005   |
| GB0044R  | -0.07 (-0.23 - 0.14)  |      | 0.453   | -0.07 (-0.82 - 0.88)  |      | 0.881   |

Table A2: continued. Quantification of trends (ppbv/yr and %/yr) in O<sub>3</sub> monthly mean 1996-2005. 95% confidence interval given in brackets. \*\*\* significant at 99.9% level, \*\* significant at 99.0% level, \* significant at 95.0% level, + significant at 90.0% level. † high altitude sites (>1000 m). ‡ 2σ error. ◊ significant trends only

| ID                            | Trend (ppbv/yr)       | Sig. | p value | Trend (%/yr)          | Sig | p value |
|-------------------------------|-----------------------|------|---------|-----------------------|-----|---------|
| GB0045R                       | 0.65 ( 0.46 - 0.86)   | ***  | <0.001  | 3.67 ( 2.54 - 5.06)   | *** | <0.001  |
| GB0617A                       | 0.00 (-0.18 - 0.18)   |      | 0.962   | 0.35 (-0.69 - 1.28)   |     | 0.552   |
| HPB                           | 0.16 (-0.04 - 0.34)   | +    | 0.085   | 0.44 (-0.14 - 1.01)   |     | 0.101   |
| HU0002R                       | -1.28 (-1.64 - -0.87) | ***  | <0.001  | -4.11 (-5.46 - -2.89) | *** | <0.001  |
| IE31                          | 0.09 (-0.08 - 0.33)   |      | 0.251   | 0.32 (-0.22 - 1.08)   |     | 0.247   |
| IT04                          | 0.23 (-0.04 - 0.51)   | +    | 0.080   | 6.05 ( 3.94 - 8.74)   | *** | <0.001  |
| LT0015R                       | 0.31 ( 0.13 - 0.50)   | **   | 0.001   | 1.14 ( 0.41 - 1.76)   | **  | 0.004   |
| LV0010R                       | -0.33 (-0.53 - -0.16) | **   | 0.003   | -1.92 (-2.84 - -1.04) | *** | <0.001  |
| NL0007R                       | 0.12 (-0.05 - 0.29)   |      | 0.209   | 0.70 (-0.45 - 1.86)   |     | 0.244   |
| NL0009R                       | 0.32 ( 0.09 - 0.52)   | **   | 0.002   | 1.52 ( 0.50 - 2.71)   | **  | 0.004   |
| NL0010R                       | 0.20 ( 0.03 - 0.37)   | *    | 0.024   | 0.08 (-1.35 - 1.43)   |     | 0.895   |
| NL0196A                       | 0.06 (-0.13 - 0.26)   |      | 0.534   | -0.24 (-1.52 - 1.28)  |     | 0.766   |
| NL0198A                       | 0.13 (-0.06 - 0.33)   |      | 0.172   | 0.90 (-0.36 - 2.08)   |     | 0.120   |
| NL0202A                       | 0.25 ( 0.04 - 0.47)   | *    | 0.021   | 1.90 ( 0.23 - 3.46)   | *   | 0.019   |
| NL0205A                       | 0.22 ( 0.01 - 0.43)   | *    | 0.033   | 0.76 (-0.50 - 1.75)   |     | 0.217   |
| NL0207A                       | 0.20 (-0.04 - 0.41)   | +    | 0.074   | 1.18 ( 0.24 - 2.21)   | *   | 0.013   |
| NL0209A                       | 0.21 ( 0.01 - 0.44)   | *    | 0.043   | 2.02 ( 0.43 - 4.03)   | *   | 0.015   |
| NL0220A                       | 0.02 (-0.14 - 0.24)   |      | 0.828   | 0.36 (-0.76 - 1.59)   |     | 0.543   |
| NL0223A                       | 0.08 (-0.08 - 0.26)   |      | 0.400   | 1.33 ( 0.29 - 2.70)   | *   | 0.043   |
| NL0226A                       | 0.08 (-0.06 - 0.24)   |      | 0.250   | 0.04 (-1.44 - 1.31)   |     | 0.924   |
| NL0227A                       | 0.05 (-0.13 - 0.27)   |      | 0.640   | 0.47 (-0.75 - 1.75)   |     | 0.451   |
| NL0228A                       | 0.22 ( 0.05 - 0.42)   | *    | 0.013   | 1.05 ( 0.02 - 2.18)   | +   | 0.057   |
| NL0229A                       | 0.45 ( 0.27 - 0.65)   | ***  | <0.001  | 3.56 ( 2.21 - 4.93)   | *** | <0.001  |
| NL0231A                       | 0.09 (-0.18 - 0.35)   |      | 0.503   | 0.97 (-0.42 - 2.22)   |     | 0.120   |
| NL0232A                       | 0.05 (-0.12 - 0.26)   |      | 0.608   | 0.01 (-1.40 - 1.57)   |     | 0.993   |
| NL0250A                       | 0.15 (-0.07 - 0.40)   |      | 0.183   | 0.72 (-0.69 - 2.24)   |     | 0.396   |
| NO01                          | -0.16 (-0.31 - -0.03) | *    | 0.022   | -0.87 (-1.50 - -0.32) | **  | 0.001   |
| †PL03                         | -0.43 (-0.78 - -0.12) | **   | 0.003   | -1.38 (-2.44 - -0.42) | **  | 0.003   |
| PT0004R                       | 0.32 (-0.39 - 0.96)   |      | 0.263   | 0.30 (-2.04 - 2.86)   |     | 0.750   |
| †PUY                          | 0.03 (-0.21 - 0.28)   |      | 0.821   | 0.16 (-0.40 - 0.75)   |     | 0.577   |
| SI0008R                       | -0.24 (-0.48 - 0.03)  | *    | 0.045   | -2.22 (-3.55 - -0.64) | **  | 0.001   |
| †ZUG                          | -0.29 (-0.41 - -0.17) | ***  | <0.001  | -0.57 (-0.83 - -0.28) | *** | <0.001  |
| European average <sup>†</sup> | 0.16 ± 0.02 ppbv/yr   |      |         | 0.83 ± 0.08 %/yr      |     |         |
| Range <sup>◊</sup>            | -1.28 to 1.05 ppbv/yr |      |         | -4.12 to 6.05 %/yr    |     |         |

Table A3: Quantification of trends (ppbv/yr and %/yr) in O<sub>3</sub> monthly 5<sup>th</sup> percentiles 1996-2005. 95% confidence interval given in brackets. \*\*\* significant at 99.9% level, \*\* significant at 99.0% level, \* significant at 95.0% level, + significant at 90.0% level. † high altitude sites (>1000 m). ‡ 2σ error. ◊ significant trends only

| ID       | Trend (ppbv/yr)      | Sig. | p value | Trend (%/yr)          | Sig. | p value |
|----------|----------------------|------|---------|-----------------------|------|---------|
| AT0002R  | 0.09 (-0.05 - 0.25)  |      | 0.212   | 1.75 ( 0.16 - 3.67)   | *    | 0.017   |
| †AT0004R | 0.33 ( 0.03 - 0.65)  | *    | 0.038   | 1.44 ( -0.26 - 3.25)  | +    | 0.090   |
| †AT0005R | 0.31 ( 0.06 - 0.60)  | *    | 0.019   | 1.58 ( 0.38 - 3.09)   | *    | 0.019   |
| †AT0034R | 0.47 ( 0.22 - 0.72)  | ***  | <0.001  | 3.88 ( 1.49 - 6.16)   | ***  | <0.001  |
| AT0044A  | 0.02 (-0.11 - 0.13)  |      | 0.779   | 1.10 ( -1.25 - 3.50)  |      | 0.381   |
| AT0052A  | 0.43 ( 0.13 - 0.69)  | ***  | <0.001  | 4.87 ( 2.43 - 7.40)   | ***  | <0.001  |
| AT0054A  | 0.20 (-0.05 - 0.46)  | +    | 0.088   | 0.93 ( -0.49 - 2.29)  |      | 0.162   |
| †AT0058A | 0.03 (-0.22 - 0.27)  |      | 0.782   | 0.06 ( -0.64 - 0.86)  |      | 0.852   |
| †AT0064A | 0.33 ( 0.02 - 0.63)  | *    | 0.029   | 0.74 ( -0.11 - 1.74)  | +    | 0.082   |
| AT0069A  | 0.17 (-0.03 - 0.38)  | +    | 0.095   | 1.01 ( -0.44 - 2.89)  |      | 0.206   |
| AT0073A  | -0.06 (-0.32 - 0.25) |      | 0.666   | -0.48 ( -1.88 - 0.96) |      | 0.493   |
| †AT0079A | 0.06 (-0.12 - 0.25)  |      | 0.490   | 0.15 ( -0.33 - 0.61)  |      | 0.528   |
| AT0080A  | 0.03 ( 0.00 - 0.07)  | ***  | <0.001  | 0.79 ( 0.14 - 2.79)   | ***  | <0.001  |
| AT0086A  | 0.59 ( 0.40 - 0.83)  | ***  | <0.001  | 7.05 ( 5.01 - 9.09)   | ***  | <0.001  |
| †AT0089A | 0.14 (-0.14 - 0.45)  |      | 0.341   | 0.41 ( -0.44 - 1.34)  |      | 0.369   |
| AT0094A  | 0.34 ( 0.01 - 0.74)  | *    | 0.044   | 2.40 ( -0.04 - 5.35)  | *    | 0.033   |
| AT0095A  | 0.45 ( 0.29 - 0.64)  | ***  | <0.001  | 6.08 ( 4.03 - 8.12)   | ***  | <0.001  |
| AT0096A  | 0.54 ( 0.34 - 0.73)  | ***  | <0.001  | 4.44 ( 2.63 - 6.78)   | ***  | <0.001  |
| AT0101A  | 0.50 ( 0.30 - 0.70)  | ***  | <0.001  | 5.49 ( 3.58 - 7.73)   | ***  | <0.001  |
| AT0102A  | 0.49 ( 0.33 - 0.71)  | ***  | <0.001  | 5.01 ( 3.20 - 7.39)   | ***  | <0.001  |
| AT0103A  | 0.18 ( 0.01 - 0.34)  | *    | 0.023   | 1.82 ( -0.07 - 3.75)  | +    | 0.053   |
| AT0105A  | 0.73 ( 0.53 - 0.94)  | ***  | <0.001  | 4.89 ( 3.34 - 6.80)   | ***  | <0.001  |
| †AT0108A | 0.50 ( 0.19 - 0.80)  | ***  | <0.001  | 1.76 ( 0.64 - 2.90)   | ***  | <0.001  |
| AT0111A  | 0.29 ( 0.16 - 0.44)  | ***  | <0.001  | 2.36 ( 0.62 - 3.94)   | **   | 0.007   |
| AT0115A  | 0.25 (-0.05 - 0.54)  | +    | 0.057   | 0.86 ( -0.68 - 2.36)  |      | 0.211   |
| AT0121A  | 0.47 ( 0.22 - 0.72)  | ***  | <0.001  | 3.88 ( 1.49 - 6.16)   | ***  | <0.001  |
| AT0122A  | 0.16 ( 0.06 - 0.28)  | ***  | <0.001  | 4.16 ( 0.73 - 7.36)   | *    | 0.011   |
| †AT0124A | -0.04 (-0.30 - 0.23) |      | 0.775   | -0.04 ( -0.75 - 0.69) |      | 0.931   |
| AT0128A  | 0.02 (-0.11 - 0.14)  |      | 0.765   | 1.81 ( -0.49 - 4.44)  |      | 0.121   |
| AT0134A  | 0.67 ( 0.40 - 0.98)  | ***  | <0.001  | 3.72 ( 2.08 - 5.47)   | ***  | <0.001  |
| AT0141A  | 0.14 ( 0.02 - 0.26)  | *    | 0.013   | 2.93 ( -0.63 - 6.27)  | +    | 0.054   |
| AT0143A  | 0.00 (-0.06 - 0.09)  |      | 0.764   | -0.01 ( -4.36 - 4.03) |      | 0.987   |
| †AT0146A | -0.05 (-0.32 - 0.29) |      | 0.751   | -0.57 ( -2.14 - 1.00) |      | 0.396   |
| AT0149A  | 0.44 ( 0.27 - 0.60)  | ***  | <0.001  | 3.40 ( 1.86 - 4.95)   | ***  | <0.001  |
| AT0153A  | 0.28 ( 0.00 - 0.57)  | *    | 0.040   | 1.14 ( -0.10 - 2.74)  | +    | 0.065   |
| AT0154A  | 0.98 ( 0.69 - 1.26)  | ***  | <0.001  | 4.31 ( 3.15 - 5.68)   | ***  | <0.001  |
| AT0162A  | 0.13 ( 0.03 - 0.21)  | **   | 0.002   | 3.39 ( -0.58 - 6.97)  | +    | 0.070   |
| AT0164A  | 0.26 ( 0.19 - 0.37)  | ***  | <0.001  | 9.07 ( 6.59 - 11.83)  | ***  | <0.001  |
| AT0166A  | 0.27 ( 0.12 - 0.44)  | ***  | <0.001  | 4.94 ( 1.82 - 8.40)   | **   | 0.002   |
| AT0167A  | 0.98 ( 0.57 - 1.35)  | ***  | <0.001  | 3.50 ( 1.68 - 5.22)   | ***  | <0.001  |
| AT0175A  | 0.46 ( 0.20 - 0.77)  | ***  | <0.001  | 2.61 ( 1.22 - 4.09)   | ***  | <0.001  |
| AT0176A  | 0.41 ( 0.18 - 0.63)  | ***  | <0.001  | 1.76 ( 0.86 - 3.06)   | ***  | <0.001  |



Table A3: continued. Quantification of trends (ppbv/yr and %/yr) in O<sub>3</sub> monthly 5<sup>th</sup> percentiles 1996-2005. 95% confidence interval given in brackets. \*\*\* significant at 99.9% level, \*\* significant at 99.0% level, \* significant at 95.0% level, + significant at 90.0% level. † high altitude sites (>1000 m). ‡ 2σ error. ◊ significant trends only

| ID       | Trend (ppbv/yr)       | Sig. | p value | Trend (%/yr)           | Sig. | p value |
|----------|-----------------------|------|---------|------------------------|------|---------|
| †AT0180A | -0.53 (-0.79 - -0.22) | **   | 0.002   | -1.53 ( -2.31 - -0.64) | **   | 0.004   |
| BE0032R  | 0.12 (-0.01 - 0.25)   | +    | 0.085   | 2.50 ( -0.10 - 5.14)   | +    | 0.061   |
| BE0033R  | -0.09 (-0.19 - 0.00)  | *    | 0.037   | -6.32 (-10.53 - -2.54) | ***  | <0.001  |
| BE0035R  | 0.00 (-0.05 - 0.05)   |      | 0.892   | 0.30 ( -1.99 - 3.06)   |      | 0.522   |
| BE0211A  | -0.05 (-0.10 - 0.00)  | *    | 0.040   | -4.51 ( -7.24 - -1.87) | **   | 0.003   |
| BE0238A  | 0.41 ( 0.27 - 0.57)   | ***  | <0.001  | 5.05 ( 2.98 - 6.97)    | ***  | <0.001  |
| BE0294A  | -0.01 (-0.10 - 0.08)  |      | 0.854   | -1.84 ( -5.20 - 0.96)  |      | 0.279   |
| BE0298A  | -0.04 (-0.08 - -0.01) | *    | 0.012   | -2.90 ( -6.02 - -0.57) | *    | 0.010   |
| BE0302A  | 0.12 ( 0.01 - 0.24)   | *    | 0.027   | 3.18 ( 0.84 - 5.67)    | **   | 0.005   |
| BE0304A  | 0.19 ( 0.04 - 0.35)   | *    | 0.011   | 2.43 ( -0.28 - 4.83)   | +    | 0.054   |
| BE0311A  | 0.06 (-0.15 - 0.25)   |      | 0.637   | 0.61 ( -0.68 - 2.08)   |      | 0.479   |
| BE0345A  | -0.06 (-0.15 - 0.00)  |      | 0.110   | -5.74 (-10.18 - -1.09) | **   | 0.004   |
| †CH0001R | -0.01 (-0.20 - 0.18)  |      | 0.906   | -0.01 ( -0.52 - 0.48)  |      | 0.960   |
| CH0002R  | 0.37 ( 0.23 - 0.49)   | ***  | <0.001  | 7.21 ( 5.11 - 9.56)    | ***  | <0.001  |
| CH0003R  | 0.16 ( 0.06 - 0.26)   | **   | 0.002   | 2.98 ( 0.78 - 5.06)    | **   | 0.006   |
| †CH0004R | 0.12 (-0.08 - 0.35)   |      | 0.280   | 0.58 ( -0.27 - 1.63)   |      | 0.212   |
| †CH0005R | 0.53 ( 0.25 - 0.87)   | ***  | <0.001  | 2.69 ( 1.30 - 4.61)    | ***  | <0.001  |
| CH0019A  | 0.44 ( 0.01 - 0.92)   | *    | 0.021   | 2.73 ( -1.31 - 5.89)   | +    | 0.068   |
| CH0024A  | 0.09 ( 0.04 - 0.15)   | ***  | <0.001  | 4.88 ( 2.42 - 8.05)    | ***  | <0.001  |
| CH0033A  | 0.07 ( 0.04 - 0.12)   | ***  | <0.001  | 8.45 ( 5.16 - 12.38)   | ***  | <0.001  |
| †CMN     | 0.02 (-0.18 - 0.22)   |      | 0.849   | 0.00 ( -0.55 - 0.48)   |      | 0.975   |
| CZ0001R  | -0.09 (-0.33 - 0.14)  |      | 0.511   | -0.34 ( -1.55 - 0.88)  |      | 0.561   |
| CZ0003R  | 0.18 (-0.01 - 0.38)   | +    | 0.060   | 1.56 ( 0.08 - 2.92)    | *    | 0.024   |
| CZ0017A  | -0.04 (-0.31 - 0.24)  |      | 0.739   | -0.22 ( -1.58 - 1.18)  |      | 0.736   |
| CZ0030A  | -0.09 (-0.36 - 0.17)  |      | 0.406   | -0.03 ( -2.11 - 2.37)  |      | 0.967   |
| CZ0041A  | 0.18 (-0.11 - 0.49)   |      | 0.193   | 2.06 ( 0.14 - 3.97)    | *    | 0.033   |
| CZ0045A  | 0.43 ( 0.21 - 0.70)   | ***  | <0.001  | 2.76 ( 1.23 - 4.52)    | ***  | <0.001  |
| †CZ0049A | 0.07 (-0.16 - 0.33)   |      | 0.574   | 0.17 ( -0.93 - 1.48)   |      | 0.700   |
| CZ0051A  | 0.57 ( 0.34 - 0.82)   | ***  | <0.001  | 2.74 ( 1.54 - 4.14)    | ***  | <0.001  |
| †CZ0055A | -0.64 (-1.06 - -0.22) | **   | 0.001   | -3.06 ( -4.97 - -1.18) | ***  | 0.001   |
| CZ0057A  | 0.10 (-0.16 - 0.38)   |      | 0.401   | 0.82 ( -0.72 - 2.32)   |      | 0.257   |
| CZ0062A  | 0.39 ( 0.16 - 0.62)   | ***  | <0.001  | 2.59 ( 1.06 - 4.22)    | ***  | <0.001  |
| †DE0003R | 0.15 (-0.12 - 0.37)   |      | 0.264   | 0.30 ( -0.72 - 1.26)   |      | 0.565   |
| DE0007R  | -0.06 (-0.20 - 0.08)  |      | 0.348   | -0.37 ( -3.35 - 2.56)  |      | 0.835   |
| DE0008R  | 0.24 (-0.01 - 0.48)   | *    | 0.033   | 1.32 ( -0.02 - 2.85)   | *    | 0.033   |
| DE0009R  | 0.11 (-0.06 - 0.29)   |      | 0.178   | 1.10 ( -0.18 - 3.06)   |      | 0.101   |
| DE0035R  | 0.27 ( 0.03 - 0.50)   | *    | 0.027   | 2.31 ( 0.42 - 4.78)    | *    | 0.016   |
| DE0422A  | 0.00 ( 0.00 - 0.00)   |      | 0.445   | -0.67 ( -0.72 - -0.42) | ***  | <0.001  |
| DE0510A  | 0.01 (-0.01 - 0.08)   |      | 0.772   | 0.10 ( -0.70 - 1.61)   |      | 0.796   |
| DE0514A  | 0.00 (-0.03 - 0.02)   |      | 0.391   | -0.03 ( -0.59 - 0.64)  |      | 0.608   |
| DE0556A  | 0.38 ( 0.19 - 0.60)   | ***  | <0.001  | 2.78 ( 1.17 - 5.19)    | ***  | <0.001  |
| DE0649A  | 0.18 ( 0.10 - 0.31)   | ***  | <0.001  | 4.40 ( 2.77 - 6.02)    | ***  | <0.001  |

Table A3: continued. Quantification of trends (ppbv/yr and %/yr) in O<sub>3</sub> monthly 5<sup>th</sup> percentiles 1996-2005. 95% confidence interval given in brackets. \*\*\* significant at 99.9% level, \*\* significant at 99.0% level, \* significant at 95.0% level, + significant at 90.0% level. † high altitude sites (>1000 m). ‡ 2σ error. ◊ significant trends only

| ID       | Trend (ppbv/yr)       | Sig. | p value | Trend (%/yr)           | Sig. | p value |
|----------|-----------------------|------|---------|------------------------|------|---------|
| DE0651A  | 0.25 ( 0.07 - 0.44)   | **   | 0.009   | 2.43 ( 0.74 - 4.21)    | **   | 0.004   |
| DE0674A  | 0.31 ( 0.09 - 0.51)   | **   | 0.002   | 2.70 ( 0.98 - 4.64)    | **   | 0.002   |
| DE0679A  | 0.18 (-0.03 - 0.45)   | +    | 0.091   | 1.94 ( 0.16 - 3.90)    | *    | 0.022   |
| DE0680A  | 0.41 ( 0.27 - 0.56)   | ***  | <0.001  | 3.70 ( 2.05 - 5.54)    | ***  | <0.001  |
| DE0684A  | -0.34 (-0.73 - 0.05)  | +    | 0.053   | -1.50 ( -2.94 - 0.36)  | +    | 0.072   |
| DE0685A  | 0.34 ( 0.19 - 0.53)   | ***  | <0.001  | 4.20 ( 2.59 - 6.33)    | ***  | <0.001  |
| DE0686A  | 0.11 (-0.10 - 0.30)   |      | 0.235   | 0.46 ( -0.96 - 2.49)   |      | 0.474   |
| DE0687A  | 0.25 ( 0.04 - 0.48)   | *    | 0.013   | 1.91 ( 0.51 - 3.82)    | **   | 0.007   |
| DE0688A  | 0.34 ( 0.15 - 0.52)   | ***  | <0.001  | 4.48 ( 2.41 - 6.82)    | ***  | <0.001  |
| DE0699A  | 0.35 ( 0.15 - 0.57)   | ***  | <0.001  | 6.02 ( 3.66 - 8.51)    | ***  | <0.001  |
| DE0719A  | 0.45 ( 0.29 - 0.66)   | ***  | <0.001  | 4.05 ( 2.39 - 6.18)    | ***  | <0.001  |
| DE0732A  | -0.02 (-0.21 - 0.12)  |      | 0.703   | 0.45 ( -0.90 - 2.19)   |      | 0.531   |
| DE0735A  | 0.33 ( 0.15 - 0.51)   | ***  | <0.001  | 3.62 ( 1.98 - 5.51)    | ***  | <0.001  |
| DE0737A  | 0.19 (-0.05 - 0.42)   | +    | 0.078   | 1.43 ( -0.15 - 3.28)   | *    | 0.049   |
| DE0738A  | 0.10 ( 0.04 - 0.15)   | ***  | <0.001  | 3.67 ( 1.64 - 5.62)    | ***  | <0.001  |
| DE0739A  | 0.32 ( 0.11 - 0.53)   | **   | 0.001   | 2.32 ( 0.29 - 4.58)    | *    | 0.016   |
| DE0754A  | 0.00 (-0.06 - 0.03)   |      | 0.799   | -0.43 ( -5.03 - 1.81)  |      | 0.543   |
| DE0844A  | 0.07 ( 0.00 - 0.17)   | *    | 0.047   | 0.48 ( 0.02 - 1.47)    | *    | 0.026   |
| DE0874A  | 0.00 ( 0.00 - 0.01)   | ***  | <0.001  | 0.00 ( 0.00 - 0.00)    | *    | 0.017   |
| DE0907A  | 0.01 ( 0.00 - 0.09)   |      | 0.193   | 0.67 ( 0.01 - 2.28)    | *    | 0.013   |
| DE0960A  | 0.00 (-0.18 - 0.19)   |      | 0.943   | -0.04 ( -1.68 - 1.88)  |      | 0.965   |
| DE0996A  | 0.26 ( 0.12 - 0.42)   | **   | 0.004   | 1.51 ( 0.75 - 2.40)    | ***  | <0.001  |
| EE0011R  | -0.38 (-0.62 - -0.10) | **   | 0.004   | -1.54 ( -2.69 - -0.10) | *    | 0.014   |
| †ES0007R | -0.62 (-1.16 - -0.14) | **   | 0.007   | -2.39 (-4.47 - -0.54)  | **   | 0.005   |
| ES1222A  | -0.11 (-0.18 - -0.05) | **   | 0.007   | -4.88 (-7.44 - -2.83)  | ***  | <0.001  |
| ES1400A  | -0.69 (-0.98 - -0.38) | ***  | <0.001  | -5.14 (-7.61 - -2.94)  | ***  | <0.001  |
| †ES1435A | 0.11 (-0.14 - 0.32)   |      | 0.345   | 0.43 (-0.67 - 1.27)    |      | 0.370   |
| †ES1437A | -0.49 (-0.72 - -0.20) | ***  | 0.001   | -1.70 (-2.51 - -0.76)  | ***  | <0.001  |
| †ES1441A | -0.11 (-0.37 - 0.14)  |      | 0.421   | -0.37 (-1.25 - 0.30)   |      | 0.310   |
| FR08     | 0.27 (-0.07 - 0.62)   | +    | 0.085   | 1.45 ( -0.44 - 3.73)   | +    | 0.099   |
| GB0002R  | 0.04 (-0.07 - 0.19)   |      | 0.407   | 0.87 ( -1.04 - 2.98)   |      | 0.329   |
| GB0006R  | 0.26 ( 0.11 - 0.40)   | ***  | <0.001  | 6.92 ( 3.19 - 10.08)   | ***  | <0.001  |
| GB0013R  | 0.22 (-0.01 - 0.45)   | +    | 0.060   | 1.54 ( -0.16 - 3.45)   |      | 0.102   |
| GB0014R  | 0.32 ( 0.17 - 0.50)   | ***  | <0.001  | 3.34 ( 1.74 - 5.55)    | ***  | <0.001  |
| GB0015R  | 0.08 (-0.13 - 0.36)   |      | 0.427   | 0.38 ( -0.68 - 1.62)   |      | 0.451   |
| GB0031R  | 0.53 ( 0.16 - 0.86)   | **   | 0.003   | 3.27 ( 1.04 - 5.55)    | **   | 0.002   |
| GB0033R  | 0.17 (-0.05 - 0.43)   |      | 0.174   | 1.86 ( 0.00 - 3.89)    | +    | 0.082   |
| GB0036R  | 0.24 ( 0.07 - 0.44)   | **   | 0.003   | 2.86 ( 0.30 - 5.54)    | *    | 0.024   |
| GB0037R  | 0.26 ( 0.03 - 0.46)   | *    | 0.024   | 2.50 ( 0.62 - 4.89)    | *    | 0.010   |
| GB0038R  | 0.13 (-0.03 - 0.30)   | +    | 0.100   | 1.54 ( -0.27 - 3.36)   |      | 0.105   |
| GB0039R  | 0.25 ( 0.10 - 0.40)   | **   | 0.002   | 4.35 ( 2.21 - 7.14)    | ***  | <0.001  |
| GB0044R  | 0.15 (-0.04 - 0.33)   |      | 0.106   | 1.30 ( -0.57 - 3.22)   |      | 0.187   |

Table A3: continued. Quantification of trends (ppbv/yr and %/yr) in O<sub>3</sub> monthly 5<sup>th</sup> percentiles 1996-2005. 95% confidence interval given in brackets. \*\*\* significant at 99.9% level, \*\* significant at 99.0% level, \* significant at 95.0% level, + significant at 90.0% level. † high altitude sites (>1000 m). ‡ 2σ error. ◊ significant trends only

| ID                            | Trend (ppbv/yr)       | Sig. | p value | Trend (%/yr)           | Sig. | p value |
|-------------------------------|-----------------------|------|---------|------------------------|------|---------|
| GB0045R                       | 0.38 ( 0.26 - 0.50)   | ***  | <0.001  | 10.64 ( 7.67 - 13.97)  | ***  | <0.001  |
| GB0617A                       | 0.04 (-0.02 - 0.14)   |      | 0.206   | 1.63 ( 0.04 - 4.53)    | +    | 0.053   |
| HPB                           | 0.16 (-0.09 - 0.41)   |      | 0.201   | 1.01 ( -0.21 - 2.28)   | +    | 0.077   |
| HU0002R                       | -0.70 (-1.00 - -0.39) | ***  | <0.001  | -4.87 ( -6.93 - -2.74) | ***  | <0.001  |
| IE31                          | 0.19 (-0.16 - 0.56)   |      | 0.228   | 0.48 ( -0.93 - 2.35)   |      | 0.457   |
| IT04                          | 0.67 ( 0.52 - 0.80)   | ***  | <0.001  | 20.02 ( 16.91 - 23.46) | ***  | <0.001  |
| LT0015R                       | 0.36 ( 0.05 - 0.65)   | *    | 0.023   | 2.40 ( -0.08 - 4.57)   | +    | 0.053   |
| LV0010R                       | -0.45 (-0.59 - -0.29) | ***  | <0.001  | -5.31 ( -7.71 - -3.29) | ***  | <0.001  |
| NL0007R                       | 0.02 (-0.04 - 0.09)   |      | 0.571   | -0.68 ( -4.44 - 2.93)  |      | 0.660   |
| NL0009R                       | 0.08 ( 0.02 - 0.19)   | *    | 0.022   | 2.92 ( 1.08 - 4.90)    | **   | 0.004   |
| NL0010R                       | -0.01 (-0.05 - 0.04)  |      | 0.468   | -2.39 ( -5.94 - 0.63)  | +    | 0.086   |
| NL0196A                       | -0.03 (-0.08 - 0.00)  | +    | 0.062   | -4.83 ( -8.63 - -0.63) | *    | 0.017   |
| NL0198A                       | 0.00 (-0.06 - 0.08)   |      | 0.894   | -0.27 ( -3.19 - 2.81)  |      | 0.848   |
| NL0202A                       | 0.04 (-0.01 - 0.09)   |      | 0.117   | 1.85 ( -2.20 - 5.83)   |      | 0.347   |
| NL0205A                       | -0.05 (-0.13 - 0.03)  |      | 0.223   | -2.76 ( -6.51 - 0.74)  |      | 0.108   |
| NL0207A                       | 0.15 ( 0.03 - 0.29)   | **   | 0.008   | 2.19 ( 0.18 - 4.83)    | +    | 0.052   |
| NL0209A                       | 0.03 (-0.03 - 0.11)   |      | 0.345   | 3.13 ( -2.44 - 8.79)   |      | 0.197   |
| NL0220A                       | 0.03 (-0.02 - 0.11)   |      | 0.198   | 0.98 ( -1.80 - 4.14)   |      | 0.508   |
| NL0223A                       | 0.09 ( 0.04 - 0.15)   | **   | 0.001   | 6.16 ( 2.87 - 9.35)    | **   | 0.002   |
| NL0226A                       | -0.03 (-0.07 - 0.01)  |      | 0.197   | -3.94 ( -8.38 - 0.25)  | +    | 0.093   |
| NL0227A                       | 0.00 (-0.06 - 0.11)   |      | 0.895   | -2.50 ( -5.76 - 1.06)  |      | 0.165   |
| NL0228A                       | 0.03 (-0.02 - 0.09)   |      | 0.249   | 0.92 ( -2.04 - 4.24)   |      | 0.465   |
| NL0229A                       | 0.04 ( 0.01 - 0.10)   | *    | 0.013   | 4.28 ( 0.73 - 7.71)    | *    | 0.012   |
| NL0231A                       | 0.03 (-0.05 - 0.15)   |      | 0.432   | 0.85 ( -3.03 - 4.48)   |      | 0.610   |
| NL0232A                       | -0.02 (-0.04 - 0.01)  |      | 0.199   | -2.79 ( -5.26 - 0.10)  | +    | 0.066   |
| NL0250A                       | -0.06 (-0.12 - -0.01) | *    | 0.023   | -3.65 ( -6.48 - 0.28)  | +    | 0.059   |
| NO01                          | -0.26 (-0.42 - -0.07) | **   | 0.003   | -3.33 ( -5.42 - -1.04) | **   | 0.002   |
| †PL03                         | -0.88 (-1.51 - -0.37) | ***  | <0.001  | -4.11 ( -7.53 - -1.40) | **   | 0.002   |
| PT0004R                       | -0.39 (-0.93 - 0.08)  | *    | 0.042   | -3.82 ( -9.33 - 1.70)  | +    | 0.084   |
| †PUY                          | 0.13 (-0.18 - 0.46)   |      | 0.435   | 0.43 ( -0.51 - 1.51)   |      | 0.374   |
| SI0008R                       | -0.05 (-0.09 - 0.02)  |      | 0.116   | -4.90 ( -8.75 - -0.75) | *    | 0.011   |
| †ZUG                          | -0.34 (-0.55 - -0.15) | **   | 0.003   | -0.90 ( -1.39 - -0.43) | **   | 0.002   |
| European average <sup>†</sup> | 0.13 ± 0.02 ppbv/yr   |      |         | 1.40 ± 0.19 %/yr       |      |         |
| Range <sup>◊</sup>            | -0.88 to 0.98 ppbv/yr |      |         | -6.32 to 20.02 %/yr    |      |         |

Table A4: Quantification of trends (ppbv/yr and %/yr) in O<sub>3</sub> monthly 95<sup>th</sup> percentiles 1996-2005. 95% confidence interval given in brackets. \*\*\* significant at 99.9% level, \*\* significant at 99.0% level, \* significant at 95.0% level, + significant at 90.0% level. † high altitude sites (>1000 m). ‡ 2σ error. ◊ significant trends only

| ID       | Trend (ppbv/yr)      | Sig. | p value | Trend (%/yr)         | Sig. | p value |
|----------|----------------------|------|---------|----------------------|------|---------|
| AT0002R  | 0.23 (-0.02 - 0.49)  | +    | 0.074   | 0.50 (-0.06 - 1.00)  | +    | 0.075   |
| †AT0004R | 0.25 (-0.01 - 0.55)  | *    | 0.046   | 0.44 (-0.04 - 0.99)  | +    | 0.058   |
| †AT0005R | 0.35 ( 0.07 - 0.62)  | *    | 0.021   | 0.69 ( 0.15 - 1.18)  | *    | 0.018   |
| †AT0034R | 0.45 ( 0.20 - 0.69)  | ***  | <0.001  | 0.91 ( 0.41 - 1.47)  | ***  | <0.001  |
| AT0044A  | -0.06 (-0.40 - 0.30) |      | 0.810   | -0.16 (-0.92 - 0.75) |      | 0.686   |
| AT0052A  | 0.31 (-0.03 - 0.66)  | +    | 0.093   | 0.59 (-0.04 - 1.25)  | +    | 0.089   |
| AT0054A  | 0.25 ( 0.01 - 0.53)  | *    | 0.046   | 0.41 (-0.05 - 1.01)  | +    | 0.083   |
| †AT0058A | 0.19 (-0.04 - 0.48)  | +    | 0.070   | 0.37 (-0.05 - 0.84)  | +    | 0.061   |
| †AT0064A | 0.25 ( 0.02 - 0.50)  | *    | 0.033   | 0.44 (-0.03 - 0.93)  | +    | 0.060   |
| AT0069A  | 0.22 (-0.07 - 0.50)  |      | 0.132   | 0.40 (-0.14 - 0.94)  |      | 0.148   |
| AT0073A  | 0.00 (-0.29 - 0.29)  |      | 0.971   | -0.12 (-0.67 - 0.36) |      | 0.686   |
| †AT0079A | 0.22 ( 0.00 - 0.40)  | *    | 0.031   | 0.36 (-0.01 - 0.66)  | *    | 0.031   |
| AT0080A  | 0.11 (-0.29 - 0.44)  |      | 0.537   | 0.19 (-0.76 - 0.98)  |      | 0.651   |
| AT0086A  | 0.79 ( 0.39 - 1.17)  | ***  | <0.001  | 1.75 ( 1.00 - 2.71)  | ***  | <0.001  |
| †AT0089A | 0.19 ( 0.01 - 0.43)  | *    | 0.030   | 0.49 ( 0.12 - 0.88)  | **   | 0.007   |
| AT0094A  | 0.21 (-0.15 - 0.68)  |      | 0.264   | 0.36 (-0.35 - 1.19)  |      | 0.316   |
| AT0095A  | 0.75 ( 0.44 - 1.08)  | ***  | <0.001  | 1.77 ( 1.10 - 2.47)  | ***  | <0.001  |
| AT0096A  | 0.56 ( 0.21 - 0.96)  | **   | 0.003   | 1.12 ( 0.41 - 1.89)  | **   | 0.004   |
| AT0101A  | 0.32 ( 0.02 - 0.62)  | *    | 0.035   | 0.63 ( 0.07 - 1.23)  | *    | 0.032   |
| AT0102A  | 0.63 ( 0.31 - 0.93)  | ***  | <0.001  | 1.24 ( 0.52 - 2.00)  | **   | 0.002   |
| AT0103A  | -0.01 (-0.30 - 0.30) |      | 0.935   | -0.03 (-0.59 - 0.62) |      | 0.921   |
| AT0105A  | 0.64 ( 0.31 - 1.01)  | ***  | <0.001  | 1.28 ( 0.52 - 1.98)  | ***  | <0.001  |
| †AT0108A | 0.33 (-0.04 - 0.70)  | +    | 0.053   | 0.57 (-0.09 - 1.19)  | *    | 0.046   |
| AT0111A  | 0.68 ( 0.32 - 1.02)  | ***  | <0.001  | 1.44 ( 0.56 - 2.24)  | **   | 0.001   |
| AT0115A  | 0.18 (-0.13 - 0.50)  |      | 0.198   | 0.35 (-0.26 - 0.99)  |      | 0.196   |
| AT0121A  | 0.45 ( 0.20 - 0.69)  | ***  | <0.001  | 0.91 ( 0.41 - 1.47)  | ***  | <0.001  |
| AT0122A  | 0.31 (-0.11 - 0.73)  |      | 0.127   | 0.59 (-0.47 - 1.50)  |      | 0.231   |
| †AT0124A | -0.02 (-0.30 - 0.34) |      | 0.881   | -0.01 (-0.53 - 0.60) |      | 0.967   |
| AT0128A  | 0.31 (-0.07 - 0.66)  | +    | 0.094   | 0.65 (-0.12 - 1.50)  | +    | 0.078   |
| AT0134A  | 0.76 ( 0.43 - 1.18)  | ***  | <0.001  | 1.55 ( 0.87 - 2.38)  | ***  | <0.001  |
| AT0141A  | 0.33 ( 0.10 - 0.59)  | *    | 0.010   | 0.69 ( 0.17 - 1.31)  | *    | 0.012   |
| AT0143A  | 0.52 ( 0.21 - 0.82)  | ***  | <0.001  | 1.31 ( 0.52 - 2.18)  | ***  | <0.001  |
| †AT0146A | 0.14 (-0.07 - 0.36)  |      | 0.157   | 0.28 (-0.17 - 0.72)  |      | 0.181   |
| AT0149A  | 0.56 ( 0.30 - 0.81)  | ***  | <0.001  | 1.18 ( 0.67 - 1.68)  | ***  | <0.001  |
| AT0153A  | 0.13 (-0.20 - 0.51)  |      | 0.457   | 0.27 (-0.37 - 1.00)  |      | 0.430   |
| AT0154A  | 1.16 ( 0.79 - 1.52)  | ***  | <0.001  | 2.06 ( 1.39 - 2.74)  | ***  | <0.001  |
| AT0162A  | 0.24 (-0.07 - 0.56)  | +    | 0.097   | 0.52 (-0.21 - 1.29)  |      | 0.144   |
| AT0164A  | 0.45 ( 0.01 - 0.85)  | *    | 0.018   | 0.82 ( 0.08 - 1.57)  | *    | 0.012   |
| AT0166A  | 0.73 ( 0.48 - 1.02)  | ***  | <0.001  | 1.61 ( 0.94 - 2.34)  | ***  | <0.001  |
| AT0167A  | 1.21 ( 0.79 - 1.67)  | ***  | <0.001  | 2.04 ( 1.30 - 2.94)  | ***  | <0.001  |
| AT0175A  | 0.41 ( 0.05 - 0.79)  | *    | 0.012   | 0.74 ( 0.06 - 1.35)  | *    | 0.019   |
| AT0176A  | 0.48 ( 0.17 - 0.76)  | **   | 0.002   | 0.81 ( 0.24 - 1.37)  | **   | 0.004   |

Table A4: continued. Quantification of trends (ppbv/yr and %/yr) in O<sub>3</sub> monthly 95<sup>th</sup> percentiles 1996-2005. 95% confidence interval given in brackets. \*\*\* significant at 99.9% level, \*\* significant at 99.0% level, \* significant at 95.0% level, + significant at 90.0% level. † high altitude sites (>1000 m). ‡ 2σ error. ◊ significant trends only

| ID       | Trend (ppbv/yr)       | Sig. | p value | Trend (%/yr)          | Sig. | p value |
|----------|-----------------------|------|---------|-----------------------|------|---------|
| †AT0180A | -0.37 (-0.71 - 0.06)  | *    | 0.031   | -0.62 (-1.23 - 0.10)  | *    | 0.025   |
| BE0032R  | 0.29 (-0.08 - 0.69)   |      | 0.124   | 0.66 (-0.15 - 1.53)   | +    | 0.098   |
| BE0033R  | -0.28 (-0.56 - 0.01)  | *    | 0.031   | -0.72 (-1.36 - -0.07) | *    | 0.023   |
| BE0035R  | 0.21 (-0.09 - 0.55)   |      | 0.221   | 0.57 (-0.03 - 1.25)   | +    | 0.086   |
| BE0211A  | 0.17 (-0.21 - 0.60)   |      | 0.390   | 0.14 (-0.73 - 1.23)   |      | 0.710   |
| BE0238A  | 0.30 ( 0.01 - 0.61)   | +    | 0.053   | 0.61 ( 0.01 - 1.25)   | +    | 0.053   |
| BE0294A  | -0.02 (-0.46 - 0.50)  |      | 0.913   | 0.08 (-0.90 - 1.08)   |      | 0.872   |
| BE0298A  | 0.40 (-0.07 - 0.87)   | +    | 0.064   | 0.84 (-0.11 - 1.90)   | *    | 0.048   |
| BE0302A  | 0.46 ( 0.19 - 0.73)   | **   | 0.003   | 1.03 ( 0.42 - 1.64)   | **   | 0.002   |
| BE0304A  | 0.48 ( 0.09 - 0.87)   | *    | 0.014   | 1.05 ( 0.28 - 1.82)   | *    | 0.013   |
| BE0311A  | -0.11 (-0.45 - 0.21)  |      | 0.500   | -0.22 (-0.90 - 0.49)  |      | 0.506   |
| BE0345A  | -0.46 (-0.88 - 0.05)  | *    | 0.043   | -0.84 (-1.83 - 0.08)  | *    | 0.049   |
| †CH0001R | 0.15 (-0.01 - 0.28)   | +    | 0.072   | 0.24 (-0.02 - 0.48)   | +    | 0.068   |
| CH0002R  | 0.25 (-0.04 - 0.58)   | +    | 0.072   | 0.43 (-0.13 - 1.05)   |      | 0.107   |
| CH0003R  | 0.04 (-0.24 - 0.36)   |      | 0.831   | 0.06 (-0.50 - 0.77)   |      | 0.856   |
| †CH0004R | 0.00 (-0.29 - 0.30)   |      | 0.993   | -0.12 (-0.62 - 0.39)  |      | 0.631   |
| †CH0005R | 0.13 (-0.10 - 0.38)   |      | 0.318   | 0.16 (-0.22 - 0.57)   |      | 0.457   |
| CH0019A  | 0.10 (-0.59 - 0.60)   |      | 0.653   | 0.13 (-1.05 - 1.03)   |      | 0.768   |
| CH0024A  | 0.02 (-0.30 - 0.35)   |      | 0.903   | 0.03 (-0.65 - 0.75)   |      | 0.892   |
| CH0033A  | -0.40 (-0.76 - -0.02) | *    | 0.041   | -0.72 (-1.40 - 0.03)  | +    | 0.051   |
| †CMN     | 0.14 (-0.26 - 0.42)   |      | 0.471   | 0.17 (-0.42 - 0.60)   |      | 0.462   |
| CZ0001R  | -0.30 (-0.60 - 0.02)  | *    | 0.049   | -0.62 (-1.23 - 0.04)  | +    | 0.053   |
| CZ0003R  | 0.05 (-0.22 - 0.33)   |      | 0.696   | 0.10 (-0.44 - 0.69)   |      | 0.634   |
| CZ0017A  | -0.24 (-0.51 - 0.07)  |      | 0.111   | -0.44 (-0.98 - 0.11)  |      | 0.100   |
| CZ0030A  | 0.22 (-0.13 - 0.66)   |      | 0.144   | 0.54 (-0.29 - 1.40)   |      | 0.149   |
| CZ0041A  | 0.51 (-0.01 - 1.09)   | *    | 0.038   | 1.06 (-0.21 - 2.21)   | +    | 0.053   |
| CZ0045A  | 0.47 ( 0.15 - 0.85)   | **   | 0.003   | 0.96 ( 0.34 - 1.66)   | **   | 0.002   |
| †CZ0049A | -0.23 (-0.49 - 0.05)  |      | 0.112   | -0.46 (-0.91 - 0.05)  | +    | 0.085   |
| CZ0051A  | 0.16 (-0.13 - 0.48)   |      | 0.266   | 0.32 (-0.23 - 0.96)   |      | 0.236   |
| †CZ0055A | -0.61 (-1.27 - 0.10)  | *    | 0.044   | -1.17 (-2.32 - 0.12)  | *    | 0.034   |
| CZ0057A  | 0.03 (-0.37 - 0.40)   |      | 0.906   | 0.01 (-0.81 - 0.68)   |      | 0.975   |
| CZ0062A  | 0.49 ( 0.21 - 0.85)   | **   | 0.001   | 0.80 ( 0.23 - 1.53)   | **   | 0.007   |
| †DE0003R | 0.42 ( 0.03 - 0.78)   | *    | 0.031   | 0.58 ( 0.03 - 1.14)   | *    | 0.043   |
| DE0007R  | 0.36 ( 0.05 - 0.69)   | +    | 0.052   | 0.79 ( 0.11 - 1.49)   | +    | 0.052   |
| DE0008R  | 0.26 (-0.07 - 0.64)   |      | 0.101   | 0.46 (-0.20 - 1.16)   |      | 0.178   |
| DE0009R  | 0.14 (-0.14 - 0.41)   |      | 0.334   | 0.35 (-0.28 - 0.97)   |      | 0.288   |
| DE0035R  | 0.39 (-0.02 - 0.81)   | *    | 0.041   | 0.88 ( 0.05 - 1.70)   | *    | 0.026   |
| DE0422A  | 0.81 ( 0.47 - 1.15)   | ***  | <0.001  | 1.74 ( 1.00 - 2.48)   | ***  | <0.001  |
| DE0510A  | 0.26 (-0.04 - 0.63)   |      | 0.114   | 0.51 (-0.26 - 1.32)   |      | 0.168   |
| DE0514A  | 0.10 (-0.19 - 0.46)   |      | 0.528   | 0.21 (-0.45 - 0.99)   |      | 0.555   |
| DE0556A  | 0.51 ( 0.24 - 0.86)   | ***  | <0.001  | 1.02 ( 0.54 - 1.65)   | ***  | <0.001  |
| DE0649A  | 0.59 ( 0.28 - 0.90)   | ***  | <0.001  | 1.33 ( 0.70 - 1.98)   | ***  | <0.001  |

Table A4: continued. Quantification of trends (ppbv/yr and %/yr) in O<sub>3</sub> monthly 95<sup>th</sup> percentiles 1996-2005. 95% confidence interval given in brackets. \*\*\* significant at 99.9% level, \*\* significant at 99.0% level, \* significant at 95.0% level, + significant at 90.0% level. † high altitude sites (>1000 m). ‡ 2σ error. ◊ significant trends only

| ID       | Trend (ppbv/yr)       | Sig. | p value | Trend (%/yr)          | Sig. | p value |
|----------|-----------------------|------|---------|-----------------------|------|---------|
| DE0651A  | 0.40 ( 0.12 - 0.77)   | *    | 0.014   | 0.73 ( 0.12 - 1.42)   | *    | 0.033   |
| DE0674A  | 0.00 (-0.24 - 0.25)   |      | 0.967   | -0.02 (-0.50 - 0.52)  |      | 0.928   |
| DE0679A  | -0.03 (-0.31 - 0.28)  |      | 0.835   | -0.19 (-0.74 - 0.36)  |      | 0.496   |
| DE0680A  | 0.54 ( 0.25 - 0.87)   | ***  | <0.001  | 1.21 ( 0.55 - 1.89)   | ***  | <0.001  |
| DE0684A  | -0.44 (-1.06 - 0.15)  |      | 0.169   | -0.77 (-1.75 - 0.20)  |      | 0.121   |
| DE0685A  | 0.40 ( 0.13 - 0.75)   | **   | 0.002   | 0.82 ( 0.24 - 1.52)   | **   | 0.004   |
| DE0686A  | -0.11 (-0.35 - 0.21)  |      | 0.394   | -0.23 (-0.75 - 0.43)  |      | 0.485   |
| DE0687A  | 0.10 (-0.17 - 0.39)   |      | 0.488   | 0.21 (-0.39 - 0.80)   |      | 0.519   |
| DE0688A  | -0.05 (-0.30 - 0.22)  |      | 0.680   | -0.14 (-0.72 - 0.56)  |      | 0.657   |
| DE0699A  | 0.64 ( 0.33 - 0.96)   | ***  | <0.001  | 1.22 ( 0.63 - 1.82)   | ***  | <0.001  |
| DE0719A  | 0.57 ( 0.25 - 0.93)   | **   | 0.002   | 1.10 ( 0.49 - 1.80)   | **   | 0.001   |
| DE0732A  | 0.20 (-0.09 - 0.52)   |      | 0.166   | 0.44 (-0.24 - 1.11)   |      | 0.187   |
| DE0735A  | 0.40 ( 0.14 - 0.71)   | **   | 0.004   | 0.91 ( 0.38 - 1.47)   | **   | 0.003   |
| DE0737A  | -0.39 (-0.67 - -0.03) | *    | 0.023   | -0.88 (-1.42 - -0.25) | **   | 0.006   |
| DE0738A  | 0.20 (-0.11 - 0.55)   |      | 0.198   | 0.35 (-0.28 - 1.10)   |      | 0.295   |
| DE0739A  | 0.25 (-0.07 - 0.60)   | +    | 0.100   | 0.37 (-0.29 - 1.13)   |      | 0.247   |
| DE0754A  | -0.10 (-0.43 - 0.22)  |      | 0.519   | -0.27 (-1.10 - 0.56)  |      | 0.488   |
| DE0844A  | 0.03 (-0.22 - 0.26)   |      | 0.810   | 0.02 (-0.60 - 0.59)   |      | 0.949   |
| DE0874A  | 0.28 ( 0.05 - 0.55)   | *    | 0.022   | 0.50 (-0.06 - 1.18)   | +    | 0.078   |
| DE0907A  | 0.51 ( 0.10 - 0.99)   | *    | 0.040   | 1.31 ( 0.28 - 2.34)   | *    | 0.022   |
| DE0960A  | 0.16 (-0.18 - 0.50)   |      | 0.341   | 0.37 (-0.40 - 1.07)   |      | 0.341   |
| DE0996A  | 0.23 (-0.18 - 0.65)   |      | 0.196   | 0.48 (-0.27 - 1.29)   |      | 0.175   |
| EE0011R  | -0.51 (-0.76 - -0.23) | ***  | <0.001  | -1.11 (-1.72 - -0.48) | ***  | <0.001  |
| †ES0007R | -0.75 (-1.36 - -0.15) | **   | 0.006   | -1.38 (-2.54 - -0.28) | **   | 0.005   |
| ES1222A  | -0.63 (-0.85 - -0.40) | ***  | <0.001  | -1.39 (-1.96 - -0.88) | ***  | <0.001  |
| ES1400A  | -1.41 (-1.86 - -0.97) | ***  | <0.001  | -2.48 (-3.23 - -1.74) | ***  | <0.001  |
| †ES1435A | 0.34 ( 0.08 - 0.65)   | *    | 0.023   | 0.49 ( 0.02 - 1.04)   | +    | 0.060   |
| †ES1437A | -0.65 (-0.96 - -0.29) | ***  | <0.001  | -1.28 (-1.93 - -0.67) | ***  | <0.001  |
| †ES1441A | -0.19 (-0.44 - 0.04)  |      | 0.184   | -0.38 (-0.84 - 0.00)  |      | 0.100   |
| FR08     | 0.25 (-0.18 - 0.68)   |      | 0.253   | 0.42 (-0.42 - 1.24)   |      | 0.310   |
| GB0002R  | -0.40 (-0.60 - -0.22) | ***  | <0.001  | -1.03 (-1.55 - -0.57) | ***  | <0.001  |
| GB0006R  | 0.14 (-0.13 - 0.41)   |      | 0.246   | 0.29 (-0.40 - 1.02)   |      | 0.352   |
| GB0013R  | 0.18 (-0.03 - 0.39)   | +    | 0.100   | 0.47 (-0.02 - 0.94)   | +    | 0.066   |
| GB0014R  | 0.20 (-0.03 - 0.41)   |      | 0.110   | 0.47 (-0.07 - 0.97)   |      | 0.120   |
| GB0015R  | 0.22 (-0.02 - 0.41)   | +    | 0.070   | 0.46 (-0.12 - 0.88)   | +    | 0.098   |
| GB0031R  | 0.39 ( 0.09 - 0.64)   | **   | 0.002   | 0.90 ( 0.24 - 1.45)   | **   | 0.002   |
| GB0033R  | -0.04 (-0.23 - 0.19)  |      | 0.525   | -0.11 (-0.59 - 0.47)  |      | 0.707   |
| GB0036R  | 0.20 (-0.05 - 0.49)   |      | 0.115   | 0.45 (-0.24 - 1.21)   |      | 0.157   |
| GB0037R  | 0.08 (-0.29 - 0.41)   |      | 0.657   | 0.16 (-0.77 - 1.00)   |      | 0.686   |
| GB0038R  | 0.18 (-0.17 - 0.52)   |      | 0.293   | 0.33 (-0.32 - 1.05)   |      | 0.323   |
| GB0039R  | 0.32 ( 0.00 - 0.61)   | *    | 0.025   | 0.81 ( 0.08 - 1.51)   | *    | 0.015   |
| GB0044R  | -0.21 (-0.45 - 0.00)  | *    | 0.044   | -0.44 (-1.02 - 0.01)  | +    | 0.065   |

Table A4: continued. Quantification of trends (ppbv/yr and %/yr) in O<sub>3</sub> monthly 95<sup>th</sup> percentiles 1996-2005. 95% confidence interval given in brackets. \*\*\* significant at 99.9% level, \*\* significant at 99.0% level, \* significant at 95.0% level, + significant at 90.0% level. † high altitude sites (>1000 m). ‡ 2σ error. ◊ significant trends only

| ID                            | Trend (ppbv/yr)       | Sig. | p value | Trend (%/yr)          | Sig. | p value |
|-------------------------------|-----------------------|------|---------|-----------------------|------|---------|
| GB0045R                       | 0.76 ( 0.50 - 1.02)   | ***  | <0.001  | 2.09 ( 1.36 - 2.76)   | ***  | <0.001  |
| GB0617A                       | -0.06 (-0.30 - 0.16)  |      | 0.546   | -0.14 (-0.67 - 0.38)  |      | 0.654   |
| HPB                           | 0.23 ( 0.00 - 0.51)   | +    | 0.078   | 0.32 (-0.05 - 0.72)   |      | 0.122   |
| HU0002R                       | -1.62 (-2.23 - -1.09) | ***  | <0.001  | -3.12 (-4.05 - -2.07) | ***  | <0.001  |
| IE31                          | -0.05 (-0.23 - 0.12)  |      | 0.525   | -0.11 (-0.52 - 0.24)  |      | 0.502   |
| IT04                          | -0.57 (-1.17 - 0.07)  | *    | 0.045   | -0.75 (-1.88 - 0.55)  |      | 0.226   |
| LT0015R                       | 0.26 (-0.08 - 0.54)   | +    | 0.063   | 0.55 (-0.24 - 1.25)   | +    | 0.081   |
| LV0010R                       | -0.32 (-0.62 - -0.04) | *    | 0.040   | -0.86 (-1.58 - -0.05) | *    | 0.042   |
| NL0007R                       | 0.12 (-0.19 - 0.46)   |      | 0.457   | 0.41 (-0.39 - 1.29)   |      | 0.367   |
| NL0009R                       | 0.50 ( 0.25 - 0.71)   | ***  | <0.001  | 1.16 ( 0.52 - 1.69)   | ***  | <0.001  |
| NL0010R                       | 0.32 ( 0.01 - 0.65)   | *    | 0.039   | 0.77 (-0.02 - 1.62)   | *    | 0.045   |
| NL0196A                       | 0.13 (-0.16 - 0.46)   |      | 0.393   | 0.34 (-0.33 - 1.12)   |      | 0.361   |
| NL0198A                       | 0.15 (-0.18 - 0.49)   |      | 0.420   | 0.36 (-0.39 - 1.21)   |      | 0.361   |
| NL0202A                       | 0.24 (-0.07 - 0.58)   |      | 0.122   | 0.38 (-0.47 - 1.23)   |      | 0.345   |
| NL0205A                       | 0.46 ( 0.09 - 0.85)   | *    | 0.014   | 1.11 ( 0.18 - 2.01)   | *    | 0.023   |
| NL0207A                       | 0.14 (-0.15 - 0.41)   |      | 0.353   | 0.25 (-0.29 - 0.95)   |      | 0.487   |
| NL0209A                       | 0.24 (-0.12 - 0.59)   |      | 0.167   | 0.70 (-0.27 - 1.60)   |      | 0.153   |
| NL0220A                       | -0.04 (-0.32 - 0.32)  |      | 0.761   | -0.11 (-0.79 - 0.82)  |      | 0.741   |
| NL0223A                       | -0.01 (-0.42 - 0.38)  |      | 0.973   | 0.10 (-0.84 - 1.01)   |      | 0.842   |
| NL0226A                       | 0.30 ( 0.00 - 0.57)   | +    | 0.053   | 0.78 (-0.01 - 1.49)   | +    | 0.053   |
| NL0227A                       | -0.05 (-0.24 - 0.17)  |      | 0.650   | -0.17 (-0.65 - 0.38)  |      | 0.525   |
| NL0228A                       | 0.34 ( 0.06 - 0.63)   | *    | 0.017   | 0.78 ( 0.07 - 1.49)   | *    | 0.027   |
| NL0229A                       | 0.51 ( 0.23 - 0.83)   | **   | 0.001   | 1.44 ( 0.66 - 2.30)   | ***  | <0.001  |
| NL0231A                       | 0.01 (-0.38 - 0.40)   |      | 0.958   | -0.11 (-1.03 - 0.92)  |      | 0.836   |
| NL0232A                       | 0.10 (-0.26 - 0.47)   |      | 0.517   | 0.15 (-0.84 - 1.13)   |      | 0.730   |
| NL0250A                       | 0.32 ( 0.09 - 0.60)   | **   | 0.006   | 0.76 ( 0.21 - 1.42)   | *    | 0.010   |
| NO01                          | -0.05 (-0.28 - 0.15)  |      | 0.621   | -0.22 (-0.72 - 0.31)  |      | 0.430   |
| †PL03                         | -0.35 (-0.69 - 0.03)  | *    | 0.043   | -0.58 (-1.24 - 0.07)  | +    | 0.062   |
| PT0004R                       | 0.99 ( 0.22 - 2.01)   | **   | 0.006   | 2.15 ( 0.47 - 4.03)   | **   | 0.004   |
| †PUY                          | -0.12 (-0.38 - 0.19)  |      | 0.454   | -0.16 (-0.63 - 0.41)  |      | 0.568   |
| SI0008R                       | -0.09 (-0.47 - 0.25)  |      | 0.680   | -0.20 (-0.86 - 0.45)  |      | 0.543   |
| †ZUG                          | -0.32 (-0.52 - -0.12) | **   | 0.002   | -0.53 (-0.82 - -0.18) | **   | 0.002   |
| European average <sup>‡</sup> | 0.16 ± 0.03 ppbv/yr   |      |         | 0.35 ± 0.06 %/yr      |      |         |
| Range <sup>◊</sup>            | -1.62 to 1.21 ppbv/yr |      |         | -3.12 to 2.16 %/yr    |      |         |

Table A5: Quantification of trends (ppbv/yr) in seasonal mean O<sub>3</sub> 1996-2005. 95% confidence interval are given in brackets. Values in bold indicate significant trends p < 0.1. † represents high altitude sites (>1000 m)

| ID       | Winter<br>(DJF)            | Spring<br>(MAM)            | Summer<br>(JJA)            | Autumn<br>(SON)              |
|----------|----------------------------|----------------------------|----------------------------|------------------------------|
| AT0002R  | 0.25 (-0.74 - 1.35)        | 0.27 (-0.22 - 1.05)        | 0.16 (-0.38 - 0.95)        | -0.22 (-1.10 - 0.80)         |
| †AT0004R | 0.27 (-0.45 - 1.21)        | 0.12 (-0.56 - 0.78)        | 0.34 (-0.30 - 1.16)        | 0.08 (-0.50 - 0.75)          |
| †AT0005R | 0.73 (-0.55 - 1.58)        | 0.13 (-0.24 - 0.64)        | 0.04 (-0.97 - 0.83)        | 0.11 (-0.51 - 0.78)          |
| †AT0034R | 0.55 (-0.36 - 1.39)        | 0.32 (-0.07 - 0.81)        | <b>0.49 (-0.10 - 1.22)</b> | -0.14 (-0.45 - 0.42)         |
| AT0044A  | 0.35 (-0.68 - 1.31)        | -0.18 (-0.79 - 0.50)       | 0.33 (-0.66 - 1.32)        | -0.37 (-0.99 - 0.24)         |
| AT0052A  | 0.46 (-1.12 - 2.18)        | <b>0.54 (-0.15 - 1.17)</b> | <b>0.94 (-0.18 - 2.14)</b> | -0.18 (-1.06 - 0.77)         |
| AT0054A  | 0.20 (-0.48 - 1.08)        | 0.47 (-0.11 - 1.00)        | 0.28 (-0.44 - 1.02)        | -0.13 (-0.64 - 0.61)         |
| †AT0058A | 0.28 (-0.21 - 0.71)        | -0.05 (-0.73 - 0.59)       | 0.20 (-0.42 - 1.01)        | 0.04 (-0.52 - 0.49)          |
| †AT0064A | <b>0.33 (-0.17 - 0.83)</b> | 0.35 (-0.42 - 0.92)        | <b>0.49 (-0.05 - 1.31)</b> | 0.17 (-0.44 - 0.81)          |
| AT0069A  | 0.34 (-0.85 - 1.35)        | 0.09 (-0.62 - 0.80)        | 0.14 (-0.69 - 1.06)        | -0.29 (-1.09 - 0.41)         |
| AT0073A  | -0.05 (-1.03 - 0.74)       | 0.23 (-0.38 - 0.59)        | -0.12 (-0.96 - 0.51)       | -0.55 (-1.22 - 0.37)         |
| †AT0079A | 0.14 (-0.29 - 0.65)        | 0.26 (-0.18 - 0.82)        | 0.10 (-0.37 - 0.67)        | 0.01 (-0.47 - 0.49)          |
| AT0080A  | 0.21 (-0.26 - 0.95)        | 0.45 (-0.26 - 1.01)        | 0.14 (-0.56 - 0.80)        | -0.06 (-0.59 - 0.50)         |
| AT0086A  | <b>0.90 ( 0.15 - 2.07)</b> | 0.79 (-0.03 - 1.71)        | <b>1.11 ( 0.28 - 2.26)</b> | 0.68 (-0.53 - 1.79)          |
| †AT0089A | 0.25 (-0.20 - 0.65)        | 0.08 (-0.29 - 0.74)        | 0.37 (-0.26 - 1.23)        | 0.05 (-0.44 - 0.56)          |
| AT0094A  | 0.39 (-0.78 - 1.51)        | 0.38 (-0.39 - 1.24)        | 0.16 (-0.75 - 1.44)        | -0.55 (-1.45 - 0.56)         |
| AT0095A  | <b>0.81 (-0.01 - 2.09)</b> | <b>0.68 ( 0.28 - 1.23)</b> | <b>0.61 (-0.04 - 1.47)</b> | 0.39 (-0.43 - 1.13)          |
| AT0096A  | <b>0.87 (-0.45 - 2.07)</b> | <b>0.82 ( 0.04 - 1.55)</b> | 0.30 (-0.24 - 1.34)        | -0.14 (-0.85 - 0.83)         |
| AT0101A  | 0.52 (-0.66 - 1.77)        | 0.31 (-0.17 - 0.83)        | 0.43 (-0.20 - 1.11)        | 0.17 (-0.67 - 0.91)          |
| AT0102A  | <b>0.72 (-0.29 - 1.86)</b> | <b>1.01 ( 0.39 - 1.46)</b> | <b>0.65 ( 0.03 - 1.80)</b> | -0.02 (-0.73 - 0.87)         |
| AT0103A  | 0.22 (-0.97 - 1.31)        | 0.17 (-0.42 - 0.76)        | 0.25 (-0.41 - 0.92)        | -0.40 (-1.05 - 0.34)         |
| AT0105A  | <b>0.78 (-0.44 - 2.11)</b> | <b>1.25 ( 0.64 - 1.76)</b> | <b>0.78 ( 0.15 - 1.71)</b> | 0.18 (-0.78 - 1.09)          |
| †AT0108A | 0.42 (-0.43 - 1.07)        | <b>0.72 ( 0.03 - 1.59)</b> | 0.40 (-0.42 - 1.61)        | -0.10 (-0.82 - 0.72)         |
| AT0111A  | 0.38 (-0.81 - 1.72)        | <b>0.40 ( 0.01 - 0.98)</b> | <b>0.73 (-0.04 - 1.56)</b> | 0.06 (-0.84 - 1.19)          |
| AT0115A  | 0.40 (-0.61 - 1.21)        | 0.15 (-0.33 - 0.51)        | 0.01 (-0.72 - 0.98)        | -0.12 (-0.80 - 0.51)         |
| AT0121A  | 0.55 (-0.36 - 1.39)        | 0.32 (-0.07 - 0.81)        | <b>0.49 (-0.10 - 1.22)</b> | -0.14 (-0.45 - 0.42)         |
| AT0122A  | 0.43 (-0.48 - 1.30)        | <b>0.69 (-0.09 - 1.39)</b> | <b>0.84 ( 0.07 - 1.87)</b> | -0.23 (-1.03 - 0.42)         |
| †AT0124A | -0.01 (-0.52 - 0.61)       | -0.12 (-0.51 - 0.35)       | 0.18 (-0.51 - 1.11)        | -0.04 (-0.73 - 0.58)         |
| AT0128A  | 0.19 (-0.85 - 1.06)        | 0.03 (-0.35 - 0.73)        | 0.30 (-0.51 - 1.31)        | -0.26 (-0.86 - 0.45)         |
| AT0134A  | <b>1.30 ( 0.56 - 1.84)</b> | <b>1.33 ( 0.44 - 2.25)</b> | <b>0.64 (-0.23 - 1.76)</b> | 0.32 (-0.30 - 0.88)          |
| AT0141A  | <b>0.87 (-0.09 - 1.88)</b> | 0.06 (-0.56 - 0.60)        | 0.30 (-0.47 - 1.08)        | -0.02 (-0.54 - 0.55)         |
| AT0143A  | <b>0.54 (-0.12 - 1.36)</b> | 0.27 (-0.24 - 0.89)        | 0.26 (-0.55 - 1.13)        | -0.09 (-0.68 - 0.61)         |
| †AT0146A | 0.47 (-0.61 - 1.12)        | 0.13 (-0.32 - 0.64)        | -0.17 (-1.20 - 0.92)       | -0.30 (-0.70 - 0.09)         |
| AT0149A  | 0.42 (-0.61 - 1.70)        | <b>0.63 ( 0.08 - 1.30)</b> | <b>0.50 (-0.13 - 1.02)</b> | -0.03 (-0.84 - 0.96)         |
| AT0153A  | 0.27 (-1.18 - 1.50)        | 0.23 (-0.30 - 0.80)        | 0.67 (-0.37 - 1.97)        | -0.40 (-1.20 - 0.62)         |
| AT0154A  | <b>0.92 (-0.40 - 1.98)</b> | <b>1.59 ( 0.99 - 2.69)</b> | <b>0.82 (-0.02 - 1.85)</b> | 0.26 (-0.67 - 1.26)          |
| AT0162A  | 0.28 (-0.65 - 1.25)        | 0.16 (-0.31 - 0.57)        | 0.21 (-0.53 - 1.03)        | -0.33 (-0.94 - 0.47)         |
| AT0164A  | <b>0.70 ( 0.05 - 1.93)</b> | 0.15 (-0.30 - 0.88)        | 0.41 (-0.24 - 1.46)        | 0.13 (-0.41 - 0.78)          |
| AT0166A  | 0.51 (-0.07 - 1.29)        | <b>0.49 (-0.02 - 1.29)</b> | <b>0.59 (-0.11 - 1.33)</b> | -0.07 (-0.47 - 0.39)         |
| AT0167A  | <b>1.31 (-0.27 - 2.86)</b> | <b>1.65 ( 0.85 - 2.86)</b> | <b>1.15 ( 0.13 - 2.21)</b> | 0.47 (-0.81 - 1.49)          |
| AT0175A  | 0.20 (-1.46 - 1.14)        | <b>0.57 ( 0.01 - 1.24)</b> | 0.63 (-0.28 - 1.60)        | 0.22 (-1.27 - 1.38)          |
| AT0176A  | 0.08 (-0.61 - 1.10)        | 0.30 (-0.30 - 1.09)        | <b>0.50 (-0.05 - 1.20)</b> | -0.04 (-0.58 - 0.66)         |
| †AT0180A | -0.54 (-1.30 - 0.09)       | -0.36 (-1.15 - 0.53)       | -0.19 (-0.82 - 0.85)       | -0.32 (-1.09 - 0.27)         |
| BE0032R  | -0.19 (-1.14 - 0.91)       | 0.65 (-0.30 - 1.74)        | 0.41 (-0.26 - 0.91)        | 0.03 (-1.00 - 0.66)          |
| BE0033R  | -0.35 (-1.20 - 0.34)       | -0.33 (-0.81 - 0.25)       | -0.09 (-0.58 - 0.37)       | <b>-0.73 (-1.28 - -0.21)</b> |
| BE0035R  | 0.17 (-0.44 - 0.77)        | <b>0.89 ( 0.05 - 1.64)</b> | -0.01 (-0.55 - 0.68)       | -0.14 (-0.78 - 0.54)         |
| BE0211A  | 0.37 (-0.73 - 1.58)        | 0.33 (-0.65 - 0.92)        | 0.21 (-0.32 - 0.92)        | -0.45 (-1.17 - 0.24)         |
| BE0238A  | 0.58 (-0.38 - 1.44)        | 0.54 (-0.29 - 1.26)        | 0.27 (-0.53 - 0.90)        | 0.03 (-0.79 - 0.79)          |
| BE0294A  | 0.18 (-0.39 - 1.26)        | 0.38 (-0.76 - 0.82)        | 0.25 (-0.32 - 0.88)        | -0.68 (-1.58 - 0.23)         |
| BE0298A  | 0.42 (-0.61 - 1.26)        | 0.28 (-0.43 - 1.00)        | 0.26 (-0.48 - 0.83)        | -0.65 (-1.98 - 0.17)         |
| BE0302A  | 0.28 (-0.48 - 1.22)        | 0.23 (-1.00 - 1.56)        | 0.18 (-0.33 - 0.88)        | 0.05 (-0.79 - 0.56)          |



Table A5: continued. Quantification of trends (ppbv/yr) in seasonal mean O<sub>3</sub> 1996-2005. 95% confidence interval are given in brackets. Values in bold indicate significant trends  $p < 0.1$ . † represents high altitude sites (>1000 m).

| ID       | Winter<br>(DJF)            | Spring<br>(MAM)            | Summer<br>(JJA)             | Autumn<br>(SON)      |
|----------|----------------------------|----------------------------|-----------------------------|----------------------|
| BE0304A  | 0.16 (-0.68 - 1.15)        | <b>0.74 (-0.02 - 1.41)</b> | 0.08 (-0.61 - 0.89)         | 0.28 (-0.40 - 1.07)  |
| BE0311A  | -0.04 (-0.82 - 0.67)       | 0.03 (-1.00 - 0.82)        | 0.04 (-0.46 - 0.73)         | 0.00 (-0.98 - 0.74)  |
| BE0345A  | -0.63 (-1.37 - 0.42)       | 0.28 (-0.35 - 0.92)        | 0.44 (-0.36 - 1.09)         | -0.56 (-1.68 - 0.57) |
| †CH0001R | 0.10 (-0.20 - 0.51)        | 0.20 (-0.26 - 0.66)        | 0.03 (-0.44 - 0.53)         | -0.05 (-0.61 - 0.62) |
| CH0002R  | <b>0.80 (-0.19 - 1.84)</b> | 0.24 (-0.33 - 0.93)        | 0.34 (-0.21 - 1.03)         | -0.23 (-1.07 - 0.64) |
| CH0003R  | 0.71 (-0.24 - 1.73)        | 0.18 (-0.36 - 0.61)        | 0.14 (-0.54 - 0.79)         | -0.37 (-0.97 - 0.54) |
| †CH0004R | 0.05 (-0.55 - 0.56)        | 0.15 (-0.42 - 0.61)        | 0.07 (-0.50 - 0.93)         | -0.31 (-0.93 - 0.45) |
| †CH0005R | 0.30 (-0.55 - 1.14)        | 0.18 (-0.26 - 0.76)        | 0.26 (-0.45 - 1.03)         | 0.02 (-0.65 - 0.86)  |
| CH0019A  | 0.04 (-1.27 - 1.07)        | 0.37 (-1.43 - 1.38)        | 0.54 (-1.16 - 1.62)         | -0.33 (-2.21 - 0.81) |
| CH0024A  | 0.47 (-0.41 - 1.33)        | 0.13 (-0.70 - 0.57)        | 0.04 (-0.64 - 0.69)         | -0.21 (-1.10 - 0.66) |
| CH0033A  | 0.26 (-0.45 - 1.20)        | 0.06 (-0.43 - 1.43)        | 0.08 (-0.69 - 1.10)         | -0.43 (-1.63 - 0.27) |
| †CMN     | -0.08 (-0.55 - 0.49)       | 0.32 (-0.29 - 1.06)        | 0.35 (-0.21 - 0.84)         | -0.31 (-1.19 - 0.48) |
| CZ0001R  | 0.00 (-0.90 - 0.78)        | -0.33 (-0.93 - 0.27)       | <b>-0.63 (-1.18 - 0.09)</b> | -0.20 (-0.94 - 0.57) |
| CZ0003R  | 0.15 (-0.88 - 1.23)        | 0.06 (-0.45 - 0.61)        | 0.05 (-0.45 - 0.68)         | -0.01 (-0.69 - 0.80) |
| CZ0017A  | -0.10 (-0.94 - 0.84)       | 0.41 (-0.22 - 0.90)        | -0.36 (-0.97 - 0.26)        | -0.17 (-0.81 - 0.34) |
| CZ0030A  | -0.04 (-0.99 - 0.93)       | -0.02 (-0.45 - 0.66)       | 0.05 (-0.68 - 1.00)         | -0.05 (-1.20 - 1.10) |
| CZ0041A  | 0.08 (-1.19 - 1.27)        | 0.21 (-0.95 - 1.33)        | 0.43 (-0.29 - 1.39)         | 0.09 (-0.79 - 1.14)  |
| CZ0045A  | 0.41 (-0.75 - 1.78)        | 0.49 ( 0.04 - 1.08)        | 0.21 (-0.64 - 1.16)         | 0.03 (-1.11 - 0.94)  |
| †CZ0049A | 0.00 (-0.70 - 0.58)        | 0.13 (-0.42 - 0.61)        | -0.20 (-0.92 - 0.53)        | -0.14 (-0.73 - 0.48) |
| CZ0051A  | <b>0.64 (-0.09 - 1.43)</b> | <b>0.78 ( 0.05 - 1.33)</b> | 0.15 (-0.30 - 0.81)         | 0.11 (-0.73 - 0.99)  |
| †CZ0055A | -0.50 (-1.59 - 0.77)       | 0.15 (-1.02 - 1.33)        | 0.06 (-1.42 - 2.25)         | -0.55 (-1.99 - 0.87) |
| CZ0057A  | 0.25 (-0.72 - 1.21)        | 0.25 (-0.80 - 1.14)        | -0.35 (-1.17 - 0.54)        | -0.34 (-1.13 - 0.25) |
| CZ0062A  | 0.40 (-0.54 - 1.33)        | 0.58 (-0.26 - 1.57)        | <b>0.62 ( 0.05 - 1.34)</b>  | 0.22 (-1.05 - 1.58)  |
| †DE0003R | -0.11 (-0.63 - 0.50)       | <b>0.59 (-0.11 - 1.08)</b> | 0.45 (-0.27 - 1.02)         | 0.12 (-0.41 - 0.87)  |
| DE0007R  | 0.52 (-0.36 - 1.64)        | 0.36 (-0.15 - 1.02)        | -0.32 (-0.81 - 0.12)        | -0.24 (-1.02 - 0.53) |
| DE0008R  | 0.31 (-0.37 - 0.86)        | 0.43 (-0.30 - 1.15)        | 0.04 (-0.47 - 0.92)         | 0.02 (-0.91 - 1.15)  |
| DE0009R  | 0.28 (-0.34 - 1.05)        | 0.34 (-0.48 - 1.00)        | <b>-0.40 (-0.94 - 0.11)</b> | -0.10 (-0.81 - 0.83) |
| DE0035R  | 0.40 (-0.78 - 1.53)        | 0.45 (-0.13 - 1.16)        | 0.13 (-0.62 - 0.84)         | 0.09 (-1.23 - 1.28)  |
| DE0422A  | 0.54 (-0.35 - 1.25)        | 0.29 (-0.22 - 0.94)        | <b>0.49 ( 0.02 - 1.14)</b>  | 0.00 (-0.63 - 0.69)  |
| DE0510A  | 0.37 (-0.49 - 1.41)        | 0.06 (-0.30 - 0.64)        | 0.20 (-0.58 - 0.92)         | -0.23 (-0.91 - 0.72) |
| DE0514A  | 0.40 (-0.34 - 1.31)        | 0.09 (-0.47 - 0.57)        | -0.06 (-0.82 - 0.63)        | -0.17 (-0.76 - 0.53) |
| DE0556A  | 0.61 (-0.16 - 1.48)        | <b>0.65 (-0.01 - 1.26)</b> | <b>0.37 (-0.09 - 1.23)</b>  | 0.14 (-0.96 - 1.38)  |
| DE0649A  | 0.56 (-0.36 - 1.49)        | 0.38 (-0.20 - 1.09)        | 0.36 (-0.27 - 1.08)         | 0.17 (-0.52 - 0.98)  |
| DE0651A  | 0.29 (-0.52 - 1.07)        | 0.15 (-0.44 - 0.96)        | 0.28 (-0.39 - 1.08)         | -0.03 (-1.04 - 1.01) |
| DE0674A  | 0.13 (-0.51 - 0.78)        | 0.15 (-0.44 - 0.72)        | 0.09 (-0.61 - 0.68)         | -0.10 (-0.69 - 0.72) |
| DE0679A  | 0.31 (-0.70 - 1.21)        | 0.12 (-0.55 - 0.78)        | -0.12 (-0.75 - 0.74)        | -0.01 (-0.99 - 0.89) |
| DE0680A  | 0.47 (-0.35 - 1.20)        | 0.42 (-0.17 - 1.05)        | 0.37 (-0.29 - 1.09)         | 0.13 (-0.66 - 0.91)  |
| DE0684A  | 0.03 (-0.77 - 0.65)        | -0.45 (-1.13 - 0.20)       | <b>-1.00 (-1.87 - 0.33)</b> | -0.80 (-1.60 - 0.07) |
| DE0685A  | 0.31 (-0.52 - 1.28)        | 0.51 (-0.28 - 1.22)        | 0.26 (-0.44 - 0.93)         | 0.03 (-0.95 - 0.86)  |
| DE0686A  | 0.32 (-0.45 - 1.40)        | 0.03 (-0.67 - 0.71)        | 0.02 (-0.54 - 0.61)         | -0.18 (-0.98 - 0.56) |
| DE0687A  | 0.40 (-0.32 - 1.11)        | 0.28 (-0.31 - 0.82)        | 0.09 (-0.63 - 1.03)         | -0.07 (-0.94 - 0.74) |
| DE0688A  | 0.33 (-0.49 - 1.06)        | 0.17 (-0.55 - 0.76)        | -0.04 (-0.83 - 0.79)        | -0.13 (-0.90 - 0.69) |
| DE0699A  | 0.65 (-0.49 - 1.45)        | <b>0.75 (-0.08 - 1.47)</b> | 0.58 (-0.42 - 1.39)         | 0.03 (-0.99 - 0.99)  |
| DE0719A  | 0.65 (-0.16 - 1.49)        | 0.48 (-0.30 - 1.22)        | 0.48 (-0.38 - 1.29)         | 0.11 (-0.82 - 1.17)  |
| DE0732A  | 0.28 (-0.56 - 0.97)        | 0.00 (-0.64 - 0.61)        | -0.31 (-1.03 - 0.44)        | -0.27 (-1.06 - 0.82) |
| DE0735A  | 0.48 (-0.25 - 1.19)        | 0.30 (-0.55 - 1.08)        | 0.18 (-0.62 - 0.77)         | -0.06 (-0.66 - 0.70) |
| DE0737A  | 0.09 (-0.84 - 1.06)        | -0.16 (-0.72 - 0.53)       | -0.22 (-0.99 - 0.44)        | -0.37 (-1.26 - 0.42) |
| DE0738A  | 0.43 (-0.30 - 1.16)        | -0.08 (-0.53 - 0.54)       | <b>0.42 (-0.03 - 0.91)</b>  | -0.02 (-0.47 - 0.52) |
| DE0739A  | 0.35 (-0.72 - 1.10)        | 0.45 (-0.36 - 1.18)        | -0.03 (-0.69 - 0.89)        | 0.13 (-0.80 - 1.01)  |
| DE0754A  | 0.32 (-0.37 - 1.16)        | -0.03 (-0.53 - 0.64)       | <b>-0.68 (-1.22 - 0.02)</b> | -0.16 (-0.95 - 0.41) |
| DE0844A  | 0.33 (-0.47 - 1.13)        | 0.09 (-0.34 - 0.49)        | -0.24 (-0.67 - 0.25)        | -0.13 (-0.98 - 0.68) |

Table A5: continued. Quantification of trends (ppbv/yr) in seasonal mean O<sub>3</sub> 1996-2005. 95% confidence interval are given in brackets. Values in bold indicate significant trends  $p < 0.1$ . † represents high altitude sites (>1000 m)

| ID       | Winter<br>(DJF)              | Spring<br>(MAM)              | Summer<br>(JJA)              | Autumn<br>(SON)              |
|----------|------------------------------|------------------------------|------------------------------|------------------------------|
| DE0874A  | 0.25 (-0.52 - 1.02)          | 0.26 (-0.27 - 0.71)          | 0.07 (-0.36 - 0.58)          | 0.12 (-0.33 - 0.85)          |
| DE0907A  | 0.32 (-0.52 - 1.14)          | 0.52 (-0.47 - 1.47)          | 0.50 (-0.19 - 1.79)          | -0.02 (-0.65 - 1.08)         |
| DE0960A  | 0.24 (-0.81 - 1.11)          | 0.10 (-0.72 - 0.84)          | -0.32 (-0.91 - 0.40)         | 0.06 (-0.92 - 0.75)          |
| DE0996A  | 0.08 (-0.45 - 0.75)          | 0.02 (-0.71 - 0.63)          | 0.11 (-0.48 - 0.82)          | 0.06 (-0.62 - 1.01)          |
| EE0011R  | -0.41 (-0.95 - 0.31)         | <b>-0.41 (-0.93 - 0.08)</b>  | -0.36 (-1.07 - 0.34)         | -0.49 (-1.87 - 0.33)         |
| †ES0007R | -0.65 (-1.99 - 0.26)         | <b>-0.85 (-2.00 - 0.26)</b>  | -0.90 (-1.94 - 0.84)         | -0.79 (-2.37 - 0.55)         |
| ES1222A  | -0.36 (-0.86 - 0.23)         | -0.34 (-0.91 - 0.46)         | -0.15 (-0.72 - 0.46)         | <b>-1.22 (-2.07 - 0.03)</b>  |
| ES1400A  | -0.88 (-1.66 - 0.18)         | -0.79 (-3.15 - 0.36)         | <b>-1.07 (-2.08 - 0.15)</b>  | <b>-1.78 (-3.07 - -0.67)</b> |
| †ES1435A | -0.16 (-0.79 - 0.53)         | 0.13 (-0.52 - 0.67)          | <b>0.84 ( 0.10 - 1.37)</b>   | -0.29 (-1.27 - 0.24)         |
| †ES1437A | <b>-0.72 (-1.32 - -0.17)</b> | -0.18 (-0.67 - 0.28)         | -0.05 (-1.23 - 0.86)         | <b>-0.89 (-1.88 - 0.00)</b>  |
| †ES1441A | -0.32 (-0.95 - 0.14)         | -0.25 (-0.71 - 0.33)         | 0.10 (-0.56 - 0.52)          | -0.63 (-1.82 - 0.19)         |
| FR08     | <b>0.97 ( 0.17 - 1.56)</b>   | 0.09 (-1.12 - 0.89)          | -0.11 (-0.98 - 0.64)         | 0.46 (-0.85 - 1.36)          |
| GB0002R  | -0.05 (-0.73 - 0.59)         | 0.03 (-0.30 - 0.20)          | -0.39 (-0.82 - 0.04)         | -0.05 (-0.45 - 0.51)         |
| GB0006R  | 0.38 (-0.59 - 1.33)          | <b>0.48 ( 0.20 - 0.75)</b>   | -0.07 (-0.53 - 0.54)         | 0.19 (-0.28 - 0.81)          |
| GB0013R  | 0.31 (-0.29 - 1.21)          | 0.21 (-0.31 - 0.71)          | -0.22 (-0.66 - 0.36)         | 0.23 (-0.11 - 0.59)          |
| GB0014R  | <b>0.56 (-0.14 - 1.31)</b>   | 0.28 (-0.46 - 0.65)          | -0.32 (-0.65 - 0.17)         | 0.16 (-0.33 - 0.69)          |
| GB0015R  | 0.31 (-0.37 - 0.97)          | 0.24 (-0.04 - 0.70)          | -0.17 (-0.83 - 0.54)         | -0.02 (-0.36 - 0.84)         |
| GB0031R  | 0.50 (-0.43 - 1.42)          | <b>0.46 ( 0.07 - 0.96)</b>   | 0.01 (-0.49 - 0.41)          | <b>0.79 ( 0.11 - 1.33)</b>   |
| GB0033R  | 0.28 (-0.39 - 0.93)          | 0.01 (-0.28 - 0.37)          | -0.21 (-0.75 - 0.34)         | <b>0.29 ( 0.07 - 0.59)</b>   |
| GB0036R  | 0.45 (-0.49 - 1.27)          | 0.39 (-0.14 - 1.09)          | -0.18 (-0.66 - 0.54)         | 0.11 (-0.35 - 0.78)          |
| GB0037R  | 0.42 (-0.39 - 1.15)          | 0.33 (-0.12 - 0.75)          | -0.46 (-1.06 - 0.16)         | -0.03 (-0.58 - 0.75)         |
| GB0038R  | 0.42 (-0.45 - 1.14)          | 0.16 (-0.31 - 0.93)          | 0.00 (-0.63 - 0.55)          | 0.28 (-0.37 - 0.77)          |
| GB0039R  | 0.47 (-0.34 - 1.21)          | 0.29 (-0.11 - 0.88)          | -0.22 (-0.82 - 0.44)         | 0.21 (-0.51 - 1.00)          |
| GB0044R  | 0.00 (-0.61 - 0.83)          | 0.04 (-0.35 - 0.58)          | -0.44 (-0.84 - 0.11)         | 0.05 (-0.34 - 0.49)          |
| GB0045R  | 0.57 (-0.21 - 1.48)          | <b>0.62 ( 0.08 - 1.48)</b>   | <b>0.68 ( 0.02 - 1.31)</b>   | 0.60 (-0.03 - 1.41)          |
| GB0617A  | 0.12 (-0.55 - 0.70)          | -0.02 (-0.67 - 0.76)         | -0.16 (-0.75 - 0.38)         | -0.17 (-0.88 - 0.53)         |
| HPB      | 0.09 (-0.55 - 0.82)          | 0.16 (-0.31 - 0.85)          | 0.19 (-0.47 - 1.18)          | -0.06 (-0.88 - 0.58)         |
| HU0002R  | -0.27 (-1.58 - 1.02)         | <b>-1.88 (-2.52 - -0.81)</b> | <b>-1.27 (-2.71 - 0.08)</b>  | <b>-1.60 (-2.64 - -0.42)</b> |
| IE31     | 0.27 (-0.60 - 1.06)          | <b>0.28 (-0.01 - 0.73)</b>   | -0.17 (-0.65 - 0.34)         | 0.05 (-0.30 - 0.51)          |
| IT04     | <b>0.76 (-0.13 - 1.36)</b>   | 0.52 (-0.16 - 1.43)          | 0.07 (-0.77 - 0.57)          | -0.32 (-1.07 - 0.61)         |
| LT0015R  | 0.42 (-0.41 - 1.74)          | <b>0.68 ( 0.15 - 1.07)</b>   | 0.22 (-0.54 - 0.62)          | 0.06 (-0.83 - 0.88)          |
| LV0010R  | -0.02 (-1.03 - 1.13)         | 0.16 (-0.76 - 0.71)          | <b>-0.67 (-1.31 - -0.18)</b> | <b>-0.65 (-1.19 - 0.10)</b>  |
| NL0007R  | 0.18 (-0.46 - 0.80)          | 0.47 (-0.21 - 1.03)          | -0.02 (-0.52 - 0.55)         | -0.14 (-0.65 - 0.42)         |
| NL0009R  | 0.63 (-0.48 - 1.30)          | 0.45 (-0.15 - 0.97)          | 0.06 (-0.37 - 0.42)          | -0.14 (-0.80 - 0.55)         |
| NL0010R  | 0.19 (-0.53 - 1.02)          | <b>0.58 ( 0.08 - 1.27)</b>   | 0.16 (-0.29 - 0.64)          | -0.24 (-0.71 - 0.41)         |
| NL0196A  | -0.09 (-0.84 - 0.75)         | 0.33 (-0.27 - 1.18)          | -0.05 (-0.62 - 0.64)         | -0.08 (-0.66 - 0.53)         |
| NL0198A  | 0.02 (-1.04 - 1.04)          | 0.13 (-0.54 - 0.93)          | 0.16 (-0.30 - 0.68)          | -0.03 (-0.78 - 0.88)         |
| NL0202A  | 0.16 (-0.71 - 1.10)          | 0.36 (-0.39 - 1.11)          | 0.25 (-0.37 - 0.90)          | 0.01 (-0.72 - 0.85)          |
| NL0205A  | -0.15 (-0.86 - 0.73)         | <b>0.61 ( 0.03 - 1.30)</b>   | 0.37 (-0.25 - 0.86)          | -0.22 (-0.77 - 0.72)         |
| NL0207A  | 0.37 (-0.66 - 1.17)          | 0.29 (-0.25 - 0.91)          | 0.18 (-0.31 - 0.73)          | -0.11 (-0.95 - 0.82)         |
| NL0209A  | 0.20 (-0.74 - 1.05)          | 0.23 (-0.51 - 1.17)          | 0.08 (-0.45 - 0.59)          | -0.03 (-0.54 - 0.85)         |
| NL0220A  | 0.45 (-0.48 - 1.48)          | 0.11 (-0.44 - 0.70)          | -0.04 (-0.49 - 0.41)         | -0.30 (-0.70 - 0.26)         |
| NL0223A  | 0.00 (-0.90 - 0.74)          | 0.34 (-0.50 - 1.01)          | 0.20 (-0.46 - 0.82)          | 0.29 (-0.38 - 1.01)          |
| NL0226A  | -0.41 (-1.14 - 0.38)         | 0.30 (-0.29 - 0.93)          | 0.09 (-0.39 - 0.70)          | -0.25 (-0.71 - 0.39)         |
| NL0227A  | 0.45 (-0.44 - 0.97)          | 0.25 (-0.41 - 0.75)          | -0.17 (-0.59 - 0.27)         | -0.22 (-0.75 - 0.47)         |
| NL0228A  | 0.17 (-0.58 - 0.97)          | 0.37 (-0.16 - 0.88)          | 0.15 (-0.34 - 0.56)          | -0.10 (-0.54 - 0.56)         |
| NL0229A  | 0.45 (-0.44 - 1.10)          | 0.57 (-0.07 - 1.12)          | <b>0.67 ( 0.17 - 1.22)</b>   | 0.30 (-0.31 - 0.81)          |
| NL0231A  | 0.02 (-0.85 - 0.70)          | 0.30 (-0.55 - 1.16)          | 0.08 (-0.52 - 0.47)          | -0.12 (-0.86 - 1.00)         |
| NL0232A  | 0.46 (-0.38 - 1.13)          | 0.19 (-0.31 - 0.78)          | -0.31 (-0.79 - 0.34)         | -0.14 (-0.69 - 0.43)         |
| NL0250A  | 0.18 (-0.51 - 0.93)          | 0.19 (-0.65 - 1.00)          | 0.14 (-0.32 - 0.70)          | -0.13 (-0.77 - 0.87)         |
| NO01     | 0.06 (-0.63 - 0.83)          | <b>-0.35 (-0.73 - -0.03)</b> | -0.39 (-0.82 - 0.11)         | -0.05 (-0.39 - 0.24)         |

Table A5: continued. Quantification of trends (ppbv/yr) in seasonal mean O<sub>3</sub> 1996-2005. 95% confidence interval are given in brackets. Values in bold indicate significant trends  $p < 0.1$ . † represents high altitude sites (>1000 m)

| ID      | Winter<br>(DJF)              | Spring<br>(MAM)      | Summer<br>(JJA)      | Autumn<br>(SON)              |
|---------|------------------------------|----------------------|----------------------|------------------------------|
| † PL03  | -0.32 (-0.83 - 0.17)         | -0.59 (-1.31 - 0.23) | -0.32 (-1.43 - 0.69) | -0.19 (-1.30 - 0.97)         |
| PT0004R | -0.47 (-2.27 - 1.32)         | -0.54 (-1.44 - 2.92) | 0.31 (-1.67 - 2.85)  | 0.20 (-1.83 - 1.53)          |
| † PUY   | -0.07 (-0.48 - 0.42)         | -0.08 (-1.10 - 1.11) | 0.24 (-0.95 - 1.13)  | 0.14 (-0.43 - 0.97)          |
| SI0008R | 0.18 (-0.77 - 1.84)          | -0.51 (-1.15 - 0.30) | -0.42 (-1.08 - 0.35) | <b>-0.59 (-0.99 - 0.01)</b>  |
| † ZUG   | <b>-0.40 (-0.63 - -0.04)</b> | -0.14 (-0.64 - 0.38) | -0.25 (-0.82 - 0.20) | <b>-0.46 (-0.99 - -0.04)</b> |

Table A6: Quantification of trends (ppbv/yr) in seasonal O<sub>3</sub> 5<sup>th</sup> percentiles 1996-2005. 95% confidence interval are given in brackets. Values in bold indicate significant trends  $p < 0.1$ . † represents high altitude sites (>1000 m).

| ID       | Winter<br>(DJF)             | Spring<br>(MAM)            | Summer<br>(JJA)            | Autumn<br>(SON)             |
|----------|-----------------------------|----------------------------|----------------------------|-----------------------------|
| AT0002R  | 0.25 (-0.28 - 1.03)         | 0.27 (-0.50 - 0.76)        | 0.16 (-0.47 - 0.56)        | -0.22 (-0.50 - 0.62)        |
| †AT0004R | 0.27 (-0.58 - 1.82)         | 0.12 (-0.76 - 1.19)        | <b>0.34 ( 0.12 - 1.35)</b> | 0.08 (-1.10 - 0.76)         |
| †AT0005R | 0.73 (-0.41 - 2.13)         | 0.13 (-0.51 - 0.77)        | 0.04 (-0.50 - 0.70)        | 0.11 (-0.83 - 0.58)         |
| †AT0034R | <b>0.55 (-0.29 - 1.80)</b>  | 0.32 (-0.15 - 1.12)        | <b>0.49 ( 0.10 - 1.00)</b> | -0.14 (-0.25 - 0.38)        |
| AT0044A  | 0.35 (-0.13 - 0.37)         | -0.18 (-0.38 - 0.54)       | 0.33 (-0.63 - 0.72)        | -0.37 (-0.31 - 0.14)        |
| AT0052A  | 0.46 (-0.49 - 1.23)         | <b>0.54 ( 0.00 - 1.44)</b> | <b>0.94 (-0.03 - 1.55)</b> | -0.18 (-0.31 - 0.50)        |
| AT0054A  | 0.20 (-0.48 - 1.50)         | 0.47 (-0.23 - 0.87)        | 0.28 (-0.40 - 0.67)        | -0.13 (-1.03 - 0.54)        |
| †AT0058A | 0.28 (-0.91 - 0.87)         | -0.05 (-0.49 - 0.82)       | 0.20 (-0.25 - 0.82)        | 0.04 (-0.89 - 0.46)         |
| †AT0064A | 0.33 (-0.80 - 1.08)         | 0.35 (-0.46 - 1.04)        | <b>0.49 ( 0.17 - 1.17)</b> | 0.17 (-0.78 - 1.12)         |
| AT0069A  | 0.34 (-0.43 - 1.63)         | 0.09 (-0.36 - 1.46)        | 0.14 (-0.46 - 0.70)        | -0.29 (-1.12 - 0.74)        |
| AT0073A  | -0.05 (-0.89 - 1.44)        | 0.23 (-0.71 - 1.14)        | -0.12 (-0.74 - 0.40)       | -0.55 (-1.70 - 0.40)        |
| †AT0079A | 0.14 (-0.54 - 0.53)         | 0.26 (-0.50 - 0.67)        | 0.10 (-0.39 - 0.67)        | 0.01 (-0.70 - 0.39)         |
| AT0080A  | 0.21 ( 0.00 - 0.00)         | <b>0.45 ( 0.00 - 0.33)</b> | 0.14 (-0.12 - 0.22)        | -0.06 ( 0.00 - 0.00)        |
| AT0086A  | <b>0.90 ( 0.00 - 0.85)</b>  | <b>0.79 ( 0.38 - 1.77)</b> | <b>1.11 ( 0.41 - 1.50)</b> | 0.68 (-0.10 - 0.71)         |
| †AT0089A | 0.25 (-1.05 - 0.70)         | 0.08 (-0.48 - 0.75)        | <b>0.37 ( 0.14 - 1.41)</b> | 0.05 (-0.98 - 0.46)         |
| AT0094A  | 0.39 (-1.00 - 1.62)         | 0.38 (-0.83 - 1.47)        | 0.16 (-0.58 - 1.14)        | -0.55 (-1.51 - 0.67)        |
| AT0095A  | <b>0.81 (-0.20 - 1.17)</b>  | <b>0.68 ( 0.33 - 1.15)</b> | <b>0.61 ( 0.00 - 0.99)</b> | 0.39 (-0.33 - 0.64)         |
| AT0096A  | <b>0.87 (-0.33 - 1.99)</b>  | <b>0.82 ( 0.51 - 1.89)</b> | 0.30 (-0.12 - 1.15)        | -0.14 (-0.53 - 0.94)        |
| AT0101A  | <b>0.52 ( 0.00 - 1.81)</b>  | 0.31 (-0.42 - 0.88)        | <b>0.43 ( 0.10 - 0.86)</b> | <b>0.17 ( 0.00 - 0.65)</b>  |
| AT0102A  | <b>0.72 ( 0.00 - 1.28)</b>  | <b>1.01 ( 0.34 - 1.46)</b> | <b>0.65 ( 0.19 - 1.34)</b> | -0.02 (-0.35 - 0.46)        |
| AT0103A  | 0.22 (-0.50 - 0.83)         | 0.17 (-0.30 - 1.16)        | 0.25 (-0.18 - 0.99)        | -0.40 (-0.60 - 0.27)        |
| AT0105A  | <b>0.78 (-0.10 - 2.35)</b>  | <b>1.25 ( 0.63 - 1.69)</b> | <b>0.78 ( 0.16 - 1.36)</b> | 0.18 (-0.42 - 1.07)         |
| †AT0108A | <b>0.42 (-0.08 - 1.53)</b>  | <b>0.72 ( 0.21 - 1.75)</b> | <b>0.40 (-0.15 - 1.43)</b> | -0.10 (-1.15 - 0.57)        |
| AT0111A  | 0.38 (-0.22 - 0.89)         | 0.40 (-0.17 - 0.87)        | <b>0.73 (-0.10 - 0.89)</b> | 0.06 (-0.49 - 0.40)         |
| AT0115A  | 0.40 (-0.62 - 1.88)         | 0.15 (-0.35 - 1.06)        | 0.01 (-0.57 - 0.67)        | -0.12 (-0.75 - 0.76)        |
| AT0121A  | <b>0.55 (-0.29 - 1.80)</b>  | 0.32 (-0.15 - 1.12)        | <b>0.49 ( 0.10 - 1.00)</b> | -0.14 (-0.25 - 0.38)        |
| AT0122A  | 0.43 (-0.07 - 0.04)         | <b>0.69 ( 0.16 - 0.89)</b> | <b>0.84 ( 0.27 - 0.98)</b> | -0.23 (-0.06 - 0.00)        |
| †AT0124A | -0.01 (-0.58 - 0.61)        | -0.12 (-0.65 - 0.46)       | 0.18 (-0.36 - 0.82)        | -0.04 (-0.79 - 0.40)        |
| AT0128A  | 0.19 (-0.10 - 0.26)         | 0.03 (-0.56 - 0.40)        | 0.30 (-0.43 - 0.67)        | -0.26 (-0.17 - 0.25)        |
| AT0134A  | <b>1.30 ( 0.57 - 2.33)</b>  | <b>1.33 ( 0.31 - 1.76)</b> | 0.64 (-0.32 - 1.05)        | 0.32 (-0.32 - 0.41)         |
| AT0141A  | 0.87 ( 0.00 - 0.48)         | 0.06 (-0.53 - 0.38)        | 0.30 (-0.40 - 0.38)        | -0.02 (-0.10 - 0.37)        |
| AT0143A  | <b>0.54 ( 0.00 - 0.16)</b>  | 0.27 (-0.12 - 0.48)        | 0.26 (-0.50 - 0.24)        | <b>-0.09 (-0.15 - 0.00)</b> |
| †AT0146A | 0.47 (-0.69 - 1.96)         | 0.13 (-0.68 - 0.92)        | -0.17 (-1.13 - 0.41)       | <b>-0.30 (-0.74 - 0.06)</b> |
| AT0149A  | <b>0.42 (-0.19 - 1.54)</b>  | <b>0.63 ( 0.16 - 1.07)</b> | 0.50 (-0.14 - 0.69)        | -0.03 (-0.59 - 0.76)        |
| AT0153A  | 0.27 (-1.08 - 1.56)         | 0.23 (-0.11 - 1.01)        | 0.67 (-0.44 - 1.35)        | -0.40 (-0.99 - 0.65)        |
| AT0154A  | 0.92 (-0.68 - 2.00)         | <b>1.59 ( 0.69 - 2.50)</b> | <b>0.82 ( 0.00 - 1.61)</b> | 0.26 (-0.80 - 1.20)         |
| AT0162A  | 0.28 (-0.25 - 0.20)         | 0.16 (-0.06 - 0.51)        | 0.21 (-0.17 - 0.50)        | -0.33 (-0.19 - 0.14)        |
| AT0164A  | <b>0.70 ( 0.05 - 0.85)</b>  | <b>0.15 ( 0.03 - 0.77)</b> | <b>0.41 ( 0.06 - 0.57)</b> | <b>0.13 ( 0.16 - 0.33)</b>  |
| AT0166A  | 0.51 (-0.10 - 0.16)         | <b>0.49 ( 0.14 - 1.22)</b> | 0.59 (-0.21 - 0.97)        | -0.07 (-0.23 - 0.31)        |
| AT0167A  | 1.31 (-0.50 - 2.95)         | <b>1.65 ( 1.02 - 3.00)</b> | <b>1.15 ( 0.35 - 2.07)</b> | 0.47 (-0.84 - 1.03)         |
| AT0175A  | 0.20 (-1.15 - 1.02)         | 0.57 (-0.16 - 1.08)        | <b>0.63 (-0.16 - 1.15)</b> | 0.22 (-1.20 - 1.13)         |
| AT0176A  | 0.08 (-0.48 - 1.57)         | 0.30 (-0.40 - 1.46)        | 0.50 (-0.06 - 1.08)        | -0.04 (-0.98 - 0.92)        |
| †AT0180A | <b>-0.54 (-2.17 - 0.00)</b> | -0.36 (-1.00 - 0.31)       | -0.19 (-0.73 - 0.50)       | -0.32 (-1.38 - 0.47)        |
| BE0032R  | -0.19 (-0.36 - 0.07)        | 0.65 (-0.23 - 1.35)        | 0.41 (-0.35 - 0.87)        | 0.03 (-0.49 - 0.25)         |
| BE0033R  | <b>-0.35 (-0.16 - 0.00)</b> | -0.33 (-0.75 - 0.37)       | -0.09 (-0.67 - 0.25)       | <b>-0.73 (-0.32 - 0.00)</b> |
| BE0035R  | 0.17 (-0.06 - 0.00)         | <b>0.89 ( 0.00 - 0.49)</b> | -0.01 (-0.30 - 0.21)       | -0.14 (-0.08 - 0.00)        |
| BE0211A  | <b>0.37 (-0.12 - 0.00)</b>  | 0.33 (-0.34 - 0.39)        | 0.21 (-0.31 - 0.24)        | <b>-0.45 (-0.10 - 0.00)</b> |
| BE0238A  | 0.58 (-0.11 - 0.80)         | 0.54 (-0.20 - 1.43)        | <b>0.27 (-0.10 - 0.91)</b> | 0.03 (-0.84 - 0.76)         |
| BE0294A  | 0.18 (-0.06 - 0.00)         | 0.38 (-0.50 - 0.50)        | 0.25 (-0.11 - 0.60)        | <b>-0.68 (-0.46 - 0.00)</b> |
| BE0298A  | 0.42 (-0.07 - 0.00)         | 0.28 (-0.42 - 0.42)        | 0.26 (-0.33 - 0.40)        | <b>-0.65 (-0.12 - 0.00)</b> |
| BE0302A  | 0.28 (-0.12 - 0.32)         | 0.23 (-0.62 - 1.30)        | 0.18 (-0.48 - 0.69)        | 0.05 (-0.39 - 0.38)         |

Table A6: continued. Quantification of trends (ppbv/yr) in seasonal O<sub>3</sub> 5<sup>th</sup> percentiles 1996-2005. 95% confidence interval are given in brackets. Values in bold indicate significant trends  $p < 0.1$ . † represents high altitude sites (>1000 m).

| ID       | Winter<br>(DJF)             | Spring<br>(MAM)             | Summer<br>(JJA)              | Autumn<br>(SON)      |
|----------|-----------------------------|-----------------------------|------------------------------|----------------------|
| BE0304A  | 0.16 (-0.17 - 0.64)         | <b>0.74 (-0.07 - 1.18)</b>  | 0.08 (-0.60 - 0.56)          | 0.28 (-0.39 - 0.43)  |
| BE0311A  | -0.04 (-0.93 - 0.89)        | 0.03 (-0.88 - 1.00)         | 0.04 (-0.26 - 0.48)          | 0.00 (-0.75 - 0.75)  |
| BE0345A  | <b>-0.63 (-0.10 - 0.00)</b> | 0.28 (-0.50 - 0.63)         | 0.44 (-0.24 - 0.58)          | -0.56 (-0.07 - 0.00) |
| †CH0001R | 0.10 (-0.49 - 0.49)         | 0.20 (-0.58 - 0.64)         | 0.03 (-0.62 - 0.56)          | -0.05 (-0.69 - 0.44) |
| CH0002R  | <b>0.80 ( 0.03 - 0.40)</b>  | <b>0.24 ( 0.31 - 1.00)</b>  | <b>0.34 ( 0.13 - 0.94)</b>   | -0.23 (-0.10 - 0.16) |
| CH0003R  | <b>0.71 ( 0.01 - 0.47)</b>  | 0.18 (-0.24 - 0.72)         | 0.14 (-0.28 - 0.53)          | -0.37 (-0.16 - 0.10) |
| †CH0004R | 0.05 (-0.26 - 1.55)         | 0.15 (-0.61 - 0.91)         | 0.07 (-0.29 - 0.60)          | -0.31 (-0.99 - 0.63) |
| †CH0005R | 0.30 (-0.40 - 2.09)         | 0.18 (-0.40 - 1.28)         | <b>0.26 ( 0.05 - 1.31)</b>   | 0.02 (-0.80 - 1.18)  |
| CH0019A  | 0.04 (-0.77 - 1.18)         | 0.37 (-1.62 - 1.63)         | 0.54 (-1.10 - 2.12)          | -0.33 (-0.85 - 0.73) |
| CH0024A  | <b>0.47 ( 0.04 - 0.21)</b>  | 0.13 (-0.23 - 0.27)         | <b>0.04 ( 0.01 - 0.37)</b>   | -0.21 (-0.03 - 0.11) |
| CH0033A  | <b>0.26 ( 0.03 - 0.10)</b>  | <b>0.06 (-0.07 - 0.72)</b>  | 0.08 (-0.31 - 0.68)          | -0.43 (-0.03 - 0.07) |
| †CMN     | -0.08 (-0.83 - 0.20)        | 0.32 (-0.17 - 1.08)         | 0.35 (-0.11 - 0.59)          | -0.31 (-1.36 - 0.28) |
| CZ0001R  | 0.00 (-0.64 - 1.30)         | -0.33 (-0.50 - 0.54)        | <b>-0.63 (-1.00 - 0.00)</b>  | -0.20 (-1.00 - 0.50) |
| CZ0003R  | 0.15 (-0.58 - 1.65)         | 0.06 (-0.40 - 0.50)         | 0.05 (-0.40 - 0.44)          | -0.01 (-0.48 - 0.76) |
| CZ0017A  | -0.10 (-1.00 - 1.07)        | 0.41 (-0.49 - 1.22)         | -0.36 (-0.73 - 0.37)         | -0.17 (-0.91 - 0.55) |
| CZ0030A  | -0.04 (-1.18 - 1.20)        | <b>-0.02 (-1.10 - 0.00)</b> | 0.05 (-1.01 - 0.28)          | -0.05 (-1.29 - 0.51) |
| CZ0041A  | 0.08 (-0.83 - 0.95)         | 0.21 (-0.96 - 0.86)         | 0.43 (-0.46 - 0.78)          | 0.09 (-0.86 - 0.51)  |
| CZ0045A  | <b>0.41 (-0.38 - 2.14)</b>  | 0.49 (-0.30 - 0.97)         | 0.21 (-0.63 - 0.63)          | 0.03 (-0.83 - 0.98)  |
| †CZ0049A | 0.00 (-0.27 - 1.53)         | 0.13 (-0.41 - 0.84)         | <b>-0.20 (-0.57 - 0.00)</b>  | -0.14 (-1.00 - 0.66) |
| CZ0051A  | <b>0.64 (-0.17 - 1.70)</b>  | <b>0.78 ( 0.24 - 1.41)</b>  | 0.15 (-0.12 - 0.78)          | 0.11 (-0.59 - 1.20)  |
| †CZ0055A | -0.50 (-1.86 - 0.37)        | 0.15 (-0.70 - 1.04)         | 0.06 (-1.11 - 1.82)          | -0.55 (-1.95 - 0.34) |
| CZ0057A  | 0.25 (-0.32 - 1.68)         | 0.25 (-0.75 - 0.93)         | -0.35 (-1.19 - 0.01)         | -0.34 (-0.91 - 0.43) |
| CZ0062A  | 0.40 (-0.46 - 1.54)         | 0.58 (-0.03 - 1.34)         | <b>0.62 (-0.09 - 1.00)</b>   | 0.22 (-1.29 - 1.50)  |
| †DE0003R | -0.11 (-0.96 - 1.21)        | 0.59 (-0.60 - 1.03)         | 0.45 (-0.13 - 0.61)          | 0.12 (-1.01 - 0.59)  |
| DE0007R  | <b>0.52 (-0.06 - 0.99)</b>  | 0.36 (-0.56 - 0.49)         | <b>-0.32 (-0.82 - -0.10)</b> | -0.24 (-0.37 - 0.00) |
| DE0008R  | 0.31 (-0.20 - 1.48)         | 0.43 (-0.22 - 0.99)         | 0.04 (-0.49 - 0.40)          | 0.02 (-1.21 - 1.36)  |
| DE0009R  | 0.28 (-0.49 - 1.25)         | 0.34 (-0.88 - 0.93)         | -0.40 (-0.41 - 0.37)         | -0.10 (-0.72 - 0.50) |
| DE0035R  | 0.40 (-0.50 - 1.72)         | 0.45 (-0.14 - 0.90)         | 0.13 (-0.59 - 0.43)          | 0.09 (-1.18 - 1.10)  |
| DE0422A  | 0.54 ( 0.00 - 0.00)         | 0.29 ( 0.00 - 0.00)         | <b>0.49 ( 0.00 - 0.33)</b>   | 0.00 ( 0.00 - 0.00)  |
| DE0510A  | 0.37 ( 0.00 - 0.00)         | 0.06 (-0.30 - 0.36)         | 0.20 (-0.28 - 0.83)          | -0.23 ( 0.00 - 0.00) |
| DE0514A  | 0.40 ( 0.00 - 0.00)         | 0.09 (-0.36 - 0.18)         | -0.06 (-0.44 - 0.23)         | -0.17 ( 0.00 - 0.00) |
| DE0556A  | 0.61 (-0.17 - 1.42)         | 0.65 (-0.23 - 1.20)         | 0.37 (-0.08 - 0.99)          | 0.14 (-0.90 - 1.11)  |
| DE0649A  | 0.56 ( 0.00 - 0.43)         | 0.38 (-0.20 - 0.75)         | <b>0.36 ( 0.09 - 0.87)</b>   | 0.17 ( 0.00 - 0.15)  |
| DE0651A  | <b>0.29 (-0.11 - 1.13)</b>  | 0.15 (-0.36 - 0.89)         | 0.28 (-0.49 - 0.31)          | -0.03 (-0.66 - 0.80) |
| DE0674A  | 0.13 (-0.11 - 0.94)         | 0.15 (-0.19 - 1.00)         | 0.09 (-0.21 - 0.66)          | -0.10 (-0.47 - 0.62) |
| DE0679A  | 0.31 (-0.25 - 1.72)         | 0.12 (-0.68 - 0.54)         | -0.12 (-0.55 - 0.50)         | -0.01 (-0.81 - 0.85) |
| DE0680A  | <b>0.47 ( 0.00 - 0.58)</b>  | 0.42 (-0.17 - 1.22)         | <b>0.37 ( 0.08 - 0.75)</b>   | 0.13 (-0.31 - 0.78)  |
| DE0684A  | 0.03 (-0.80 - 1.46)         | -0.45 (-1.21 - 0.65)        | <b>-1.00 (-1.38 - 0.08)</b>  | -0.80 (-1.70 - 0.09) |
| DE0685A  | <b>0.31 ( 0.00 - 0.91)</b>  | 0.51 (-0.37 - 1.07)         | 0.26 (-0.20 - 0.78)          | 0.03 (-0.63 - 0.67)  |
| DE0686A  | 0.32 (-0.36 - 1.08)         | 0.03 (-0.43 - 0.76)         | 0.02 (-0.41 - 0.26)          | -0.18 (-1.13 - 0.82) |
| DE0687A  | 0.40 (-0.38 - 1.19)         | 0.28 (-0.30 - 0.85)         | 0.09 (-0.25 - 0.51)          | -0.07 (-0.71 - 1.02) |
| DE0688A  | 0.33 ( 0.00 - 0.78)         | 0.17 (-0.44 - 0.87)         | -0.04 (-0.21 - 0.66)         | -0.13 (-0.22 - 0.73) |
| DE0699A  | 0.65 (-0.14 - 1.27)         | 0.75 (-0.09 - 1.42)         | 0.58 (-0.23 - 0.88)          | 0.03 (-0.51 - 0.75)  |
| DE0719A  | <b>0.65 ( 0.00 - 0.88)</b>  | 0.48 (-0.28 - 1.29)         | <b>0.48 ( 0.00 - 1.03)</b>   | 0.11 (-0.49 - 0.91)  |
| DE0732A  | 0.28 (-0.17 - 1.00)         | 0.00 (-1.00 - 0.25)         | <b>-0.31 (-0.82 - 0.00)</b>  | -0.27 (-1.00 - 0.61) |
| DE0735A  | 0.48 (-0.18 - 0.86)         | 0.30 (-0.32 - 1.20)         | 0.18 (-0.25 - 0.53)          | -0.06 (-0.50 - 1.00) |
| DE0737A  | <b>0.09 (-0.08 - 1.44)</b>  | -0.16 (-0.85 - 0.69)        | -0.22 (-0.51 - 0.37)         | -0.37 (-1.15 - 0.98) |
| DE0738A  | <b>0.43 ( 0.00 - 0.38)</b>  | -0.08 (-0.22 - 0.22)        | <b>0.42 ( 0.06 - 0.32)</b>   | -0.02 ( 0.00 - 0.00) |
| DE0739A  | 0.35 ( 0.00 - 0.93)         | 0.45 (-0.41 - 1.28)         | -0.03 (-0.28 - 0.58)         | 0.13 (-0.37 - 0.90)  |
| DE0754A  | 0.32 ( 0.00 - 0.00)         | -0.03 (-0.10 - 0.45)        | -0.68 (-0.36 - 0.08)         | -0.16 (-0.08 - 0.00) |
| DE0844A  | 0.33 ( 0.00 - 0.22)         | 0.09 (-0.65 - 0.55)         | -0.24 (-0.28 - 0.30)         | -0.13 (-0.60 - 0.26) |

Table A6: continued. Quantification of trends (ppbv/yr) in seasonal O<sub>3</sub> 5<sup>th</sup> percentiles 1996-2005. 95% confidence interval are given in brackets. Values in bold indicate significant trends  $p < 0.1$ . † represents high altitude sites (>1000 m).

| ID       | Winter<br>(DJF)              | Spring<br>(MAM)              | Summer<br>(JJA)              | Autumn<br>(SON)              |
|----------|------------------------------|------------------------------|------------------------------|------------------------------|
| DE0874A  | 0.25 ( 0.00 - 0.00)          | 0.26 ( 0.00 - 0.22)          | 0.07 ( 0.00 - 0.33)          | 0.12 ( 0.00 - 0.00)          |
| DE0907A  | 0.32 ( 0.00 - 0.00)          | 0.52 (-0.41 - 1.16)          | <b>0.50 ( 0.00 - 1.20)</b>   | -0.02 ( 0.00 - 0.00)         |
| DE0960A  | <b>0.24 (-0.34 - 1.10)</b>   | 0.10 (-0.70 - 0.52)          | -0.32 (-0.63 - 0.26)         | 0.06 (-0.78 - 0.30)          |
| DE0996A  | 0.08 (-0.30 - 1.26)          | 0.02 (-0.35 - 0.97)          | 0.11 (-0.22 - 0.46)          | 0.06 (-0.81 - 1.17)          |
| EE0011R  | -0.41 (-0.89 - 0.95)         | <b>-0.41 (-1.24 - 0.18)</b>  | -0.36 (-1.01 - 0.52)         | -0.49 (-1.87 - 0.77)         |
| †ES0007R | <b>-0.88 (-2.08 - 0.25)</b>  | <b>-0.84 (-2.00 - 0.37)</b>  | -0.76 (-2.29 - 0.79)         | <b>-0.83 (-1.93 - 0.41)</b>  |
| ES1222A  | <b>-0.12 (-0.23 - 0.00)</b>  | -0.25 (-0.58 - 0.21)         | 0.01 (-0.25 - 0.42)          | <b>-0.33 (-0.65 - 0.00)</b>  |
| ES1400A  | <b>-1.01 (-1.31 - -0.50)</b> | -0.59 (-2.18 - 0.72)         | <b>-0.58 (-1.65 - 0.32)</b>  | <b>-1.04 (-1.77 - -0.17)</b> |
| †ES1435A | <b>-0.54 (-0.99 - 0.11)</b>  | 0.10 (-0.77 - 0.42)          | <b>0.60 ( 0.13 - 1.03)</b>   | -0.10 (-0.57 - 0.29)         |
| †ES1437A | <b>-0.84 (-1.48 - -0.17)</b> | -0.36 (-1.05 - 0.23)         | 0.00 (-0.94 - 0.93)          | <b>-0.67 (-1.21 - -0.14)</b> |
| †ES1441A | <b>-0.49 (-1.08 - 0.28)</b>  | -0.12 (-1.13 - 0.48)         | 0.34 (-0.19 - 0.83)          | -0.56 (-1.30 - 0.24)         |
| FR08     | <b>0.97 ( 0.11 - 1.57)</b>   | 0.09 (-1.15 - 0.99)          | -0.11 (-0.75 - 0.66)         | 0.46 (-1.03 - 1.23)          |
| GB0002R  | -0.05 (-0.52 - 0.67)         | 0.03 (-0.26 - 0.25)          | -0.39 (-0.40 - 0.16)         | -0.05 (-0.16 - 0.46)         |
| GB0006R  | 0.38 (-0.34 - 1.00)          | <b>0.48 ( 0.00 - 0.72)</b>   | -0.07 (-0.14 - 0.47)         | <b>0.19 ( 0.00 - 0.49)</b>   |
| GB0013R  | 0.31 (-0.22 - 1.37)          | 0.21 (-0.49 - 0.87)          | -0.22 (-0.76 - 0.14)         | 0.23 (-0.21 - 0.67)          |
| GB0014R  | 0.56 ( 0.00 - 1.00)          | 0.28 ( 0.00 - 0.81)          | -0.32 (-0.20 - 0.49)         | 0.16 (-0.42 - 0.88)          |
| GB0015R  | 0.31 (-0.68 - 1.41)          | 0.24 (-0.51 - 0.88)          | -0.17 (-0.76 - 0.38)         | -0.02 (-0.50 - 0.63)         |
| GB0031R  | 0.50 (-0.63 - 1.72)          | <b>0.46 ( 0.00 - 1.71)</b>   | 0.01 (-0.72 - 0.58)          | 0.79 (-0.24 - 1.28)          |
| GB0033R  | 0.28 (-0.59 - 0.80)          | 0.01 (-0.62 - 0.57)          | -0.21 (-0.50 - 0.38)         | <b>0.29 ( 0.00 - 0.86)</b>   |
| GB0036R  | 0.45 ( 0.00 - 0.58)          | 0.39 (-0.34 - 1.35)          | <b>-0.18 ( 0.00 - 0.94)</b>  | 0.11 (-0.50 - 0.50)          |
| GB0037R  | <b>0.42 ( 0.00 - 1.10)</b>   | 0.33 (-0.19 - 1.00)          | -0.46 (-0.58 - 0.00)         | -0.03 (-0.32 - 0.78)         |
| GB0038R  | 0.42 (-0.14 - 0.92)          | 0.16 (-0.17 - 1.20)          | 0.00 (-0.62 - 0.34)          | 0.28 (-0.57 - 0.64)          |
| GB0039R  | 0.47 ( 0.00 - 0.72)          | 0.29 (-0.33 - 0.93)          | -0.22 (-0.33 - 0.62)         | 0.21 (-0.29 - 0.75)          |
| GB0044R  | 0.00 (-0.33 - 1.00)          | 0.04 (-0.33 - 0.93)          | -0.44 (-0.40 - 0.32)         | 0.05 (-0.61 - 0.50)          |
| GB0045R  | <b>0.57 ( 0.00 - 0.49)</b>   | 0.62 (-0.40 - 0.98)          | <b>0.68 ( 0.00 - 0.86)</b>   | <b>0.60 ( 0.00 - 0.61)</b>   |
| GB0617A  | 0.12 ( 0.00 - 0.32)          | -0.02 (-0.50 - 0.49)         | -0.16 (-0.29 - 0.67)         | -0.17 (-0.25 - 0.00)         |
| HPB      | 0.09 (-0.47 - 1.60)          | 0.16 (-0.78 - 1.35)          | 0.19 (-0.18 - 0.78)          | -0.06 (-1.13 - 0.57)         |
| HU0002R  | -0.27 (-1.04 - 1.08)         | <b>-1.88 (-1.86 - -0.64)</b> | <b>-1.27 (-2.13 - -0.16)</b> | <b>-1.60 (-1.33 - -0.01)</b> |
| IE31     | 0.27 (-0.58 - 1.83)          | <b>0.28 (-0.15 - 1.13)</b>   | -0.17 (-1.00 - 0.50)         | 0.05 (-0.78 - 0.63)          |
| IT04     | <b>0.76 ( 0.05 - 0.32)</b>   | <b>0.52 ( 0.73 - 1.24)</b>   | <b>0.07 ( 0.38 - 0.91)</b>   | <b>-0.32 ( 0.04 - 0.45)</b>  |
| LT0015R  | <b>0.42 (-0.26 - 2.06)</b>   | <b>0.68 (-0.19 - 1.50)</b>   | 0.22 (-0.50 - 0.76)          | 0.06 (-1.11 - 0.15)          |
| LV0010R  | -0.02 (-1.00 - 1.25)         | 0.16 (-1.30 - 0.25)          | <b>-0.67 (-1.27 - -0.21)</b> | <b>-0.65 (-0.93 - -0.36)</b> |
| NL0007R  | 0.18 (-0.04 - 0.02)          | <b>0.47 (-0.03 - 0.77)</b>   | -0.02 (-0.40 - 0.24)         | <b>-0.14 (-0.11 - 0.00)</b>  |
| NL0009R  | 0.63 (-0.05 - 0.33)          | 0.45 (-0.35 - 0.81)          | 0.06 (-0.15 - 0.36)          | -0.14 (-0.45 - 0.23)         |
| NL0010R  | 0.19 (-0.07 - 0.01)          | 0.58 (-0.12 - 0.44)          | 0.16 (-0.18 - 0.42)          | <b>-0.24 (-0.05 - -0.01)</b> |
| NL0196A  | -0.09 (-0.06 - 0.04)         | 0.33 (-0.27 - 0.60)          | -0.05 (-0.82 - 0.27)         | <b>-0.08 (-0.08 - -0.03)</b> |
| NL0198A  | 0.02 (-0.08 - 0.06)          | 0.13 (-0.29 - 0.87)          | 0.16 (-0.60 - 0.33)          | -0.03 (-0.21 - 0.12)         |
| NL0202A  | 0.16 (-0.08 - 0.08)          | 0.36 (-0.21 - 0.44)          | 0.25 (-0.41 - 0.38)          | 0.01 (-0.09 - 0.04)          |
| NL0205A  | -0.15 (-0.16 - 0.02)         | 0.61 (-0.07 - 0.59)          | 0.37 (-0.47 - 0.13)          | -0.22 (-0.11 - 0.02)         |
| NL0207A  | 0.37 (-0.05 - 0.20)          | <b>0.29 ( 0.01 - 1.18)</b>   | 0.18 (-0.20 - 0.67)          | -0.11 (-0.57 - 0.32)         |
| NL0209A  | 0.20 (-0.05 - 0.09)          | 0.23 (-0.05 - 0.35)          | 0.08 (-0.39 - 0.24)          | -0.03 (-0.10 - 0.06)         |
| NL0220A  | 0.45 (-0.08 - 0.06)          | 0.11 (-0.24 - 0.60)          | -0.04 (-0.36 - 0.35)         | -0.30 (-0.12 - 0.02)         |
| NL0223A  | 0.00 (-0.06 - 0.17)          | 0.34 (-0.10 - 0.47)          | 0.20 (-0.16 - 0.39)          | <b>0.29 ( 0.00 - 0.07)</b>   |
| NL0226A  | -0.41 (-0.11 - 0.00)         | 0.30 (-0.06 - 0.45)          | 0.09 (-0.51 - 0.30)          | <b>-0.25 (-0.08 - -0.01)</b> |
| NL0227A  | 0.45 (-0.10 - 0.05)          | 0.25 (-0.23 - 1.12)          | -0.17 (-0.38 - 0.39)         | <b>-0.22 (-0.19 - -0.02)</b> |
| NL0228A  | 0.17 (-0.08 - 0.01)          | <b>0.37 (-0.01 - 0.85)</b>   | 0.15 (-0.34 - 0.32)          | -0.10 (-0.08 - 0.06)         |
| NL0229A  | 0.45 (-0.04 - 0.03)          | 0.57 (-0.02 - 0.61)          | <b>0.67 ( 0.07 - 0.53)</b>   | 0.30 (-0.03 - 0.03)          |
| NL0231A  | 0.02 (-0.09 - 0.06)          | <b>0.30 (-0.08 - 1.28)</b>   | 0.08 (-0.31 - 0.40)          | -0.12 (-0.20 - 0.10)         |
| NL0232A  | 0.46 (-0.06 - 0.02)          | 0.19 (-0.20 - 0.39)          | -0.31 (-0.31 - 0.09)         | <b>-0.14 (-0.04 - 0.00)</b>  |
| NL0250A  | 0.18 (-0.07 - 0.01)          | 0.19 (-0.28 - 0.50)          | 0.14 (-0.70 - 0.26)          | -0.13 (-0.03 - 0.03)         |
| NO01     | 0.06 (-1.07 - 0.52)          | -0.35 (-0.72 - 0.25)         | <b>-0.39 (-0.76 - 0.00)</b>  | -0.05 (-0.41 - 0.00)         |

Table A6: continued. Quantification of trends (ppbv/yr) in seasonal O<sub>3</sub> 5<sup>th</sup> percentiles 1996-2005. 95% confidence interval are given in brackets. Values in bold indicate significant trends  $p < 0.1$ . † represents high altitude sites (>1000 m).

| ID      | Winter<br>(DJF)              | Spring<br>(MAM)             | Summer<br>(JJA)              | Autumn<br>(SON)            |
|---------|------------------------------|-----------------------------|------------------------------|----------------------------|
| †PL03   | -0.32 (-1.91 - 0.38)         | <b>-0.59 (-3.14 - 0.06)</b> | -0.32 (-1.82 - 1.00)         | -0.19 (-2.36 - 0.41)       |
| PT0004R | -0.47 (-1.21 - 1.05)         | -0.54 (-2.17 - 2.12)        | 0.31 (-2.17 - 1.15)          | <b>0.20 (-2.48 - 0.09)</b> |
| †PUY    | -0.07 (-0.59 - 0.45)         | -0.08 (-0.93 - 0.93)        | 0.24 (-0.57 - 2.63)          | 0.14 (-0.89 - 0.78)        |
| SI0008R | 0.18 (-0.30 - 0.96)          | -0.51 (-0.56 - 0.21)        | <b>-0.42 (-0.13 - -0.03)</b> | -0.59 (-0.15 - 0.09)       |
| †ZUG    | <b>-0.40 (-1.08 - -0.03)</b> | -0.14 (-1.03 - 0.35)        | -0.25 (-0.55 - 0.28)         | -0.46 (-1.29 - 0.11)       |

Table A7: Quantification of trends (ppbv/yr) in seasonal O<sub>3</sub> 95<sup>th</sup> percentiles 1996-2005. 95% confidence interval are given in brackets. Values in bold indicate significant trends  $p < 0.1$ . † represents high altitude sites (>1000 m).

| ID       | Winter<br>(DJF)            | Spring<br>(MAM)            | Summer<br>(JJA)            | Autumn<br>(SON)             |
|----------|----------------------------|----------------------------|----------------------------|-----------------------------|
| AT0002R  | 0.25 (-0.96 - 1.05)        | 0.27 (-0.21 - 1.53)        | 0.16 (-0.45 - 1.26)        | -0.22 (-1.24 - 1.27)        |
| †AT0004R | 0.27 (-0.34 - 0.83)        | 0.12 (-0.64 - 1.05)        | 0.34 (-0.30 - 1.64)        | 0.08 (-0.59 - 0.86)         |
| †AT0005R | 0.73 (-0.65 - 1.28)        | 0.13 (-0.44 - 1.37)        | 0.04 (-1.60 - 1.27)        | 0.11 (-0.78 - 1.43)         |
| †AT0034R | 0.55 (-0.31 - 1.20)        | 0.32 (-0.16 - 0.94)        | 0.49 (-0.24 - 1.93)        | -0.14 (-0.89 - 0.74)        |
| AT0044A  | 0.35 (-0.74 - 1.20)        | -0.18 (-1.23 - 0.97)       | 0.33 (-0.69 - 2.20)        | -0.37 (-1.25 - 0.51)        |
| AT0052A  | 0.46 (-1.50 - 1.97)        | 0.54 (-0.43 - 1.36)        | 0.94 (-0.40 - 2.42)        | -0.18 (-1.37 - 1.15)        |
| AT0054A  | 0.20 (-0.69 - 0.83)        | 0.47 (-0.28 - 1.43)        | <b>0.28 (-0.43 - 1.32)</b> | -0.13 (-0.94 - 0.78)        |
| †AT0058A | <b>0.28 (-0.08 - 0.90)</b> | -0.05 (-0.78 - 0.60)       | 0.20 (-0.57 - 1.19)        | 0.04 (-0.50 - 0.64)         |
| †AT0064A | 0.33 (-0.04 - 0.88)        | 0.35 (-0.99 - 0.78)        | 0.49 (-0.11 - 1.81)        | 0.17 (-0.50 - 0.86)         |
| AT0069A  | 0.34 (-0.90 - 0.96)        | 0.09 (-1.00 - 1.52)        | 0.14 (-0.85 - 1.69)        | -0.29 (-1.03 - 0.99)        |
| AT0073A  | -0.05 (-1.15 - 0.24)       | 0.23 (-0.16 - 0.98)        | -0.12 (-1.06 - 1.05)       | -0.55 (-1.47 - 0.51)        |
| †AT0079A | 0.14 (-0.28 - 0.46)        | 0.26 (-0.50 - 0.97)        | 0.10 (-0.36 - 0.87)        | 0.01 (-0.65 - 0.77)         |
| AT0080A  | 0.21 (-0.96 - 1.02)        | 0.45 (-0.94 - 1.08)        | 0.14 (-0.44 - 1.45)        | -0.06 (-1.44 - 1.33)        |
| AT0086A  | <b>0.90 (-0.09 - 2.09)</b> | 0.79 (-0.84 - 2.55)        | <b>1.11 ( 0.55 - 2.76)</b> | 0.68 (-1.45 - 2.70)         |
| †AT0089A | <b>0.25 ( 0.00 - 0.69)</b> | 0.08 (-0.91 - 0.62)        | 0.37 (-0.24 - 1.61)        | 0.05 (-0.44 - 0.74)         |
| AT0094A  | 0.39 (-1.02 - 0.85)        | 0.38 (-0.75 - 1.75)        | 0.16 (-1.02 - 1.67)        | -0.55 (-1.38 - 0.67)        |
| AT0095A  | <b>0.81 (-0.03 - 2.09)</b> | <b>0.68 (-0.09 - 1.68)</b> | 0.61 (-0.23 - 1.73)        | 0.39 (-0.91 - 1.83)         |
| AT0096A  | <b>0.87 (-0.25 - 1.75)</b> | <b>0.82 ( 0.05 - 2.00)</b> | 0.30 (-0.26 - 1.82)        | -0.14 (-1.08 - 0.75)        |
| AT0101A  | 0.52 (-0.59 - 1.50)        | 0.31 (-1.03 - 1.05)        | 0.43 (-0.45 - 1.68)        | 0.17 (-1.17 - 1.25)         |
| AT0102A  | 0.72 (-0.50 - 1.59)        | <b>1.01 ( 0.31 - 2.30)</b> | 0.65 (-0.49 - 1.87)        | -0.02 (-1.70 - 1.29)        |
| AT0103A  | 0.22 (-1.24 - 1.07)        | 0.17 (-0.96 - 0.72)        | 0.25 (-0.52 - 1.10)        | -0.40 (-1.51 - 0.64)        |
| AT0105A  | 0.78 (-0.45 - 1.82)        | <b>1.25 ( 0.21 - 2.20)</b> | <b>0.78 (-0.07 - 2.30)</b> | 0.18 (-1.25 - 1.28)         |
| †AT0108A | 0.42 (-0.70 - 0.76)        | 0.72 (-0.33 - 2.08)        | 0.40 (-0.47 - 1.68)        | -0.10 (-0.84 - 1.03)        |
| AT0111A  | 0.38 (-0.67 - 1.50)        | 0.40 (-0.31 - 2.08)        | <b>0.73 ( 0.04 - 2.51)</b> | 0.06 (-0.97 - 1.74)         |
| AT0115A  | 0.40 (-0.75 - 1.14)        | 0.15 (-0.42 - 1.00)        | 0.01 (-0.70 - 1.63)        | -0.12 (-1.17 - 0.75)        |
| AT0121A  | 0.55 (-0.31 - 1.20)        | 0.32 (-0.16 - 0.94)        | 0.49 (-0.24 - 1.93)        | -0.14 (-0.89 - 0.74)        |
| AT0122A  | 0.43 (-0.95 - 1.61)        | <b>0.69 (-0.13 - 2.00)</b> | <b>0.84 (-0.02 - 2.62)</b> | -0.23 (-1.77 - 0.83)        |
| †AT0124A | -0.01 (-0.48 - 0.69)       | -0.12 (-1.06 - 0.37)       | 0.18 (-0.60 - 1.33)        | -0.04 (-0.93 - 0.80)        |
| AT0128A  | 0.19 (-1.30 - 1.48)        | 0.03 (-0.53 - 1.38)        | 0.30 (-0.61 - 2.06)        | -0.26 (-1.08 - 1.12)        |
| AT0134A  | <b>1.30 ( 0.00 - 1.80)</b> | <b>1.33 ( 0.34 - 2.70)</b> | <b>0.64 (-0.10 - 2.00)</b> | 0.32 (-0.51 - 1.58)         |
| AT0141A  | 0.87 (-0.40 - 1.87)        | 0.06 (-0.44 - 0.99)        | <b>0.30 (-0.22 - 1.48)</b> | -0.02 (-1.17 - 0.88)        |
| AT0143A  | 0.54 (-0.21 - 2.25)        | 0.27 (-0.33 - 1.34)        | <b>0.26 (-0.22 - 1.94)</b> | -0.09 (-1.16 - 1.17)        |
| †AT0146A | 0.47 (-0.70 - 1.10)        | 0.13 (-0.33 - 0.72)        | -0.17 (-1.14 - 0.96)       | -0.30 (-1.05 - 0.38)        |
| AT0149A  | 0.42 (-0.63 - 1.53)        | <b>0.63 (-0.17 - 1.87)</b> | 0.50 (-0.15 - 1.59)        | -0.03 (-1.11 - 1.39)        |
| AT0153A  | 0.27 (-1.53 - 1.36)        | 0.23 (-0.78 - 0.87)        | 0.67 (-0.68 - 2.18)        | -0.40 (-1.48 - 0.69)        |
| AT0154A  | <b>0.92 (-0.25 - 2.21)</b> | <b>1.59 ( 0.99 - 3.23)</b> | 0.82 (-0.44 - 1.85)        | 0.26 (-0.67 - 1.72)         |
| AT0162A  | 0.28 (-0.70 - 1.78)        | 0.16 (-0.48 - 0.86)        | 0.21 (-0.52 - 1.39)        | -0.33 (-1.18 - 0.92)        |
| AT0164A  | 0.70 (-0.80 - 1.99)        | 0.15 (-0.43 - 1.54)        | <b>0.41 (-0.37 - 2.09)</b> | 0.13 (-1.30 - 0.83)         |
| AT0166A  | <b>0.51 (-0.12 - 1.83)</b> | <b>0.49 ( 0.11 - 1.56)</b> | <b>0.59 (-0.20 - 2.14)</b> | -0.07 (-0.49 - 0.92)        |
| AT0167A  | 1.31 (-0.68 - 2.37)        | <b>1.65 ( 0.93 - 3.67)</b> | <b>1.15 ( 0.21 - 2.63)</b> | 0.47 (-0.84 - 2.20)         |
| AT0175A  | 0.20 (-2.49 - 1.00)        | <b>0.57 (-0.20 - 1.36)</b> | 0.63 (-0.32 - 1.81)        | 0.22 (-1.89 - 1.57)         |
| AT0176A  | 0.08 (-0.77 - 0.70)        | 0.30 (-0.62 - 1.55)        | <b>0.50 ( 0.09 - 1.91)</b> | -0.04 (-0.83 - 0.78)        |
| †AT0180A | -0.54 (-1.09 - 0.42)       | -0.36 (-1.19 - 0.74)       | -0.19 (-1.02 - 1.26)       | -0.32 (-1.11 - 0.39)        |
| BE0032R  | -0.19 (-0.73 - 1.05)       | 0.65 (-0.52 - 2.45)        | 0.41 (-0.99 - 1.57)        | 0.03 (-1.21 - 1.22)         |
| BE0033R  | -0.35 (-0.77 - 0.60)       | -0.33 (-1.10 - 0.20)       | -0.09 (-1.42 - 1.64)       | <b>-0.73 (-1.31 - 0.01)</b> |
| BE0035R  | 0.17 (-0.39 - 1.09)        | <b>0.89 ( 0.01 - 2.43)</b> | -0.01 (-1.62 - 1.28)       | -0.14 (-1.68 - 0.96)        |
| BE0211A  | 0.37 (-0.47 - 2.23)        | 0.33 (-1.50 - 1.42)        | 0.21 (-1.00 - 1.57)        | <b>-0.45 (-1.68 - 0.05)</b> |
| BE0238A  | 0.58 (-0.35 - 1.30)        | 0.54 (-0.75 - 1.74)        | 0.27 (-0.61 - 1.53)        | 0.03 (-1.30 - 0.90)         |
| BE0294A  | 0.18 (-0.49 - 1.38)        | 0.38 (-1.62 - 1.69)        | 0.25 (-0.77 - 2.07)        | <b>-0.68 (-1.86 - 0.00)</b> |
| BE0298A  | 0.42 (-0.38 - 1.65)        | 0.28 (-1.31 - 1.84)        | 0.26 (-1.05 - 2.28)        | <b>-0.65 (-2.41 - 0.48)</b> |
| BE0302A  | 0.28 (-0.41 - 1.18)        | 0.23 (-1.73 - 2.39)        | 0.18 (-0.43 - 1.57)        | 0.05 (-1.20 - 1.40)         |



Table A7: continued. Quantification of trends (ppbv/yr) in seasonal O<sub>3</sub> 95<sup>th</sup> percentiles 1996-2005. 95% confidence interval are given in brackets. Values in bold indicate significant trends  $p < 0.1$ . † represents high altitude sites (>1000 m).

| ID       | Winter<br>(DJF)            | Spring<br>(MAM)            | Summer<br>(JJA)             | Autumn<br>(SON)             |
|----------|----------------------------|----------------------------|-----------------------------|-----------------------------|
| BE0304A  | 0.16 (-0.54 - 0.99)        | <b>0.74 (-0.21 - 2.17)</b> | 0.08 (-1.29 - 1.89)         | 0.28 (-1.06 - 2.29)         |
| BE0311A  | -0.04 (-0.77 - 0.59)       | 0.03 (-1.87 - 1.46)        | 0.04 (-0.71 - 1.37)         | 0.00 (-1.25 - 1.15)         |
| BE0345A  | -0.63 (-0.69 - 0.34)       | 0.28 (-1.59 - 2.07)        | 0.44 (-1.04 - 2.97)         | -0.56 (-2.47 - 1.49)        |
| †CH0001R | 0.10 (-0.16 - 0.82)        | 0.20 (-0.53 - 0.95)        | 0.03 (-0.44 - 0.62)         | -0.05 (-0.73 - 0.58)        |
| CH0002R  | 0.80 (-0.47 - 1.89)        | 0.24 (-0.61 - 1.10)        | 0.34 (-0.33 - 1.62)         | -0.23 (-1.67 - 0.85)        |
| CH0003R  | 0.71 (-0.68 - 1.07)        | 0.18 (-0.69 - 1.42)        | 0.14 (-0.97 - 1.53)         | -0.37 (-1.53 - 0.66)        |
| †CH0004R | 0.05 (-0.89 - 0.15)        | 0.15 (-0.81 - 1.01)        | 0.07 (-0.28 - 1.62)         | -0.31 (-1.53 - 0.79)        |
| †CH0005R | 0.30 (-0.67 - 0.53)        | 0.18 (-0.73 - 0.78)        | 0.26 (-0.49 - 1.80)         | 0.02 (-1.09 - 0.61)         |
| CH0019A  | 0.04 (-1.95 - 0.67)        | 0.37 (-2.70 - 1.22)        | 0.54 (-1.45 - 2.14)         | -0.33 (-3.66 - 0.45)        |
| CH0024A  | 0.47 (-0.78 - 1.35)        | 0.13 (-1.21 - 1.05)        | 0.04 (-1.41 - 0.87)         | -0.21 (-1.65 - 0.83)        |
| CH0033A  | 0.26 (-1.17 - 1.49)        | 0.06 (-1.80 - 1.34)        | 0.08 (-1.73 - 1.63)         | -0.43 (-2.73 - 0.63)        |
| †CMN     | -0.08 (-0.75 - 0.83)       | 0.32 (-0.67 - 0.98)        | 0.35 (-0.82 - 1.48)         | -0.31 (-1.58 - 0.80)        |
| CZ0001R  | 0.00 (-1.13 - 0.60)        | -0.33 (-1.43 - 0.40)       | -0.63 (-1.09 - 0.15)        | -0.20 (-1.16 - 1.02)        |
| CZ0003R  | 0.15 (-1.06 - 0.97)        | 0.06 (-1.00 - 0.81)        | 0.05 (-0.60 - 1.02)         | -0.01 (-1.23 - 1.46)        |
| CZ0017A  | -0.10 (-1.50 - 0.64)       | 0.41 (-0.98 - 0.91)        | -0.36 (-1.08 - 0.45)        | -0.17 (-1.25 - 0.68)        |
| CZ0030A  | -0.04 (-1.16 - 1.00)       | -0.02 (-0.96 - 1.04)       | 0.05 (-0.98 - 1.24)         | -0.05 (-1.38 - 1.62)        |
| CZ0041A  | 0.08 (-1.35 - 1.27)        | 0.21 (-1.01 - 2.25)        | 0.43 (-0.75 - 2.30)         | 0.09 (-1.46 - 1.69)         |
| CZ0045A  | 0.41 (-0.73 - 1.46)        | 0.49 (-0.02 - 1.50)        | 0.21 (-0.85 - 1.75)         | 0.03 (-1.95 - 1.52)         |
| †CZ0049A | 0.00 (-0.88 - 0.23)        | 0.13 (-0.73 - 0.87)        | -0.20 (-1.23 - 0.79)        | -0.14 (-1.16 - 0.48)        |
| CZ0051A  | 0.64 (-0.52 - 1.36)        | 0.78 (-0.48 - 1.49)        | 0.15 (-0.64 - 0.70)         | 0.11 (-0.90 - 1.10)         |
| †CZ0055A | -0.50 (-1.25 - 0.88)       | 0.15 (-2.17 - 2.08)        | 0.06 (-2.02 - 3.12)         | -0.55 (-1.96 - 0.95)        |
| CZ0057A  | 0.25 (-0.90 - 0.96)        | 0.25 (-1.02 - 1.52)        | -0.35 (-1.49 - 1.03)        | -0.34 (-1.25 - 0.62)        |
| CZ0062A  | 0.40 (-0.74 - 0.75)        | 0.58 (-0.91 - 1.80)        | <b>0.62 ( 0.31 - 1.88)</b>  | 0.22 (-1.21 - 2.83)         |
| †DE0003R | -0.11 (-0.69 - 0.34)       | 0.59 (-0.22 - 1.60)        | <b>0.45 (-0.12 - 2.47)</b>  | 0.12 (-0.96 - 1.09)         |
| DE0007R  | 0.52 (-0.20 - 1.30)        | 0.36 (-0.76 - 1.62)        | -0.32 (-0.98 - 1.03)        | -0.24 (-0.98 - 1.48)        |
| DE0008R  | 0.31 (-0.69 - 0.62)        | 0.43 (-1.15 - 1.46)        | 0.04 (-0.46 - 1.59)         | 0.02 (-1.12 - 1.68)         |
| DE0009R  | 0.28 (-0.30 - 0.50)        | 0.34 (-0.63 - 1.54)        | <b>-0.40 (-1.40 - 0.15)</b> | -0.10 (-0.50 - 0.76)        |
| DE0035R  | 0.40 (-0.79 - 1.03)        | 0.45 (-0.75 - 1.75)        | 0.13 (-0.74 - 1.59)         | 0.09 (-1.06 - 2.00)         |
| DE0422A  | <b>0.54 ( 0.17 - 1.97)</b> | 0.29 (-0.80 - 1.78)        | 0.49 (-0.89 - 1.95)         | 0.00 (-0.98 - 1.67)         |
| DE0510A  | 0.37 (-0.72 - 1.27)        | 0.06 (-0.70 - 1.48)        | 0.20 (-0.80 - 1.78)         | -0.23 (-1.67 - 1.08)        |
| DE0514A  | 0.40 (-0.78 - 1.33)        | 0.09 (-0.77 - 1.21)        | -0.06 (-1.02 - 1.42)        | -0.17 (-1.00 - 0.80)        |
| DE0556A  | 0.61 (-0.51 - 0.66)        | 0.65 (-0.54 - 1.91)        | <b>0.37 (-0.08 - 2.02)</b>  | 0.14 (-0.59 - 1.62)         |
| DE0649A  | 0.56 (-0.27 - 1.42)        | 0.38 (-0.71 - 1.92)        | 0.36 (-0.39 - 1.42)         | 0.17 (-0.97 - 1.29)         |
| DE0651A  | 0.29 (-0.74 - 0.59)        | 0.15 (-1.17 - 1.84)        | <b>0.28 ( 0.14 - 1.88)</b>  | -0.03 (-1.13 - 1.45)        |
| DE0674A  | 0.13 (-0.60 - 0.24)        | 0.15 (-0.63 - 1.16)        | 0.09 (-1.06 - 1.29)         | -0.10 (-0.95 - 0.50)        |
| DE0679A  | 0.31 (-0.91 - 0.43)        | 0.12 (-0.95 - 0.87)        | -0.12 (-0.98 - 0.78)        | -0.01 (-1.73 - 0.90)        |
| DE0680A  | 0.47 (-0.17 - 1.01)        | 0.42 (-0.41 - 1.87)        | 0.37 (-0.64 - 1.42)         | 0.13 (-0.74 - 1.00)         |
| DE0684A  | 0.03 (-1.21 - 0.54)        | -0.45 (-1.95 - 0.88)       | -1.00 (-2.09 - 1.20)        | -0.80 (-2.60 - 0.50)        |
| DE0685A  | 0.31 (-0.48 - 1.50)        | 0.51 (-0.72 - 1.80)        | 0.26 (-0.48 - 1.52)         | 0.03 (-1.35 - 0.91)         |
| DE0686A  | 0.32 (-0.49 - 0.70)        | 0.03 (-1.00 - 1.13)        | 0.02 (-1.00 - 1.30)         | -0.18 (-1.30 - 0.44)        |
| DE0687A  | 0.40 (-0.43 - 0.52)        | 0.28 (-0.50 - 1.56)        | 0.09 (-0.97 - 1.63)         | -0.07 (-1.18 - 0.94)        |
| DE0688A  | 0.33 (-0.58 - 0.84)        | 0.17 (-1.04 - 1.33)        | -0.04 (-1.16 - 0.66)        | -0.13 (-1.44 - 0.63)        |
| DE0699A  | 0.65 (-0.55 - 1.35)        | 0.75 (-0.50 - 1.83)        | 0.58 (-0.30 - 2.17)         | 0.03 (-1.50 - 1.34)         |
| DE0719A  | 0.65 (-0.60 - 1.08)        | 0.48 (-1.01 - 1.51)        | 0.48 (-1.11 - 1.71)         | 0.11 (-1.21 - 1.50)         |
| DE0732A  | 0.28 (-0.59 - 0.72)        | 0.00 (-0.83 - 1.57)        | -0.31 (-1.50 - 0.94)        | -0.27 (-1.00 - 1.03)        |
| DE0735A  | 0.48 (-0.45 - 0.86)        | 0.30 (-0.93 - 1.68)        | 0.18 (-0.52 - 1.94)         | -0.06 (-1.16 - 0.75)        |
| DE0737A  | 0.09 (-1.16 - 0.36)        | -0.16 (-1.30 - 1.07)       | -0.22 (-1.37 - 0.80)        | <b>-0.37 (-1.92 - 0.29)</b> |
| DE0738A  | 0.43 (-0.68 - 0.80)        | -0.08 (-1.25 - 0.85)       | 0.42 (-0.57 - 1.44)         | -0.02 (-1.16 - 1.44)        |
| DE0739A  | 0.35 (-0.90 - 0.80)        | 0.45 (-0.81 - 2.28)        | -0.03 (-1.29 - 1.24)        | 0.13 (-1.29 - 1.00)         |
| DE0754A  | 0.32 (-0.75 - 1.20)        | -0.03 (-1.94 - 1.00)       | <b>-0.68 (-1.87 - 0.28)</b> | -0.16 (-1.49 - 1.40)        |
| DE0844A  | 0.33 (-0.50 - 0.61)        | 0.09 (-0.51 - 0.83)        | -0.24 (-1.18 - 0.51)        | -0.13 (-1.04 - 1.13)        |

Table A7: continued. Quantification of trends (ppbv/yr) in seasonal O<sub>3</sub> 95<sup>th</sup> percentiles 1996-2005. 95% confidence interval are given in brackets. Values in bold indicate significant trends  $p < 0.1$ . † represents high altitude sites (>1000 m).

| ID       | Winter<br>(DJF)              | Spring<br>(MAM)              | Summer<br>(JJA)              | Autumn<br>(SON)              |
|----------|------------------------------|------------------------------|------------------------------|------------------------------|
| DE0874A  | 0.25 (-0.50 - 1.09)          | 0.26 (-0.39 - 1.16)          | 0.07 (-0.93 - 0.84)          | 0.12 (-1.00 - 1.02)          |
| DE0907A  | 0.32 (-0.83 - 1.53)          | 0.52 (-1.00 - 2.12)          | 0.50 (-0.72 - 2.01)          | -0.02 (-1.47 - 2.19)         |
| DE0960A  | 0.24 (-0.69 - 0.78)          | 0.10 (-1.26 - 1.43)          | -0.32 (-1.50 - 1.00)         | 0.06 (-0.60 - 1.24)          |
| DE0996A  | 0.08 (-0.70 - 0.43)          | 0.02 (-1.15 - 1.32)          | 0.11 (-0.55 - 1.35)          | 0.06 (-0.87 - 1.67)          |
| EE0011R  | <b>-0.41 (-1.00 - -0.02)</b> | -0.41 (-1.28 - 0.77)         | -0.36 (-1.73 - 0.85)         | -0.49 (-2.04 - 0.32)         |
| †ES0007R | -0.70 (-1.93 - 0.11)         | -0.89 (-2.00 - 0.37)         | -1.09 (-2.39 - 0.75)         | -0.85 (-2.96 - 0.93)         |
| ES1222A  | -0.29 (-1.35 - 0.48)         | -0.34 (-1.17 - 0.75)         | -0.52 (-1.40 - 0.63)         | <b>-2.28 (-4.31 - 0.14)</b>  |
| ES1400A  | -0.87 (-1.69 - 0.19)         | <b>-1.20 (-3.60 - 0.00)</b>  | <b>-1.30 (-2.79 - 0.76)</b>  | <b>-2.94 (-4.38 - -1.20)</b> |
| †ES1435A | 0.11 (-0.62 - 0.94)          | 0.34 (-0.57 - 1.23)          | <b>1.09 ( 0.26 - 1.99)</b>   | -0.55 (-2.26 - 0.66)         |
| †ES1437A | <b>-0.70 (-1.52 - -0.13)</b> | 0.15 (-0.64 - 1.04)          | -0.18 (-1.88 - 0.92)         | <b>-1.12 (-2.75 - -0.28)</b> |
| †ES1441A | <b>-0.53 (-1.22 - 0.00)</b>  | -0.13 (-0.56 - 0.86)         | -0.09 (-0.92 - 0.60)         | -0.68 (-2.81 - 0.75)         |
| FR08     | <b>0.97 (-0.03 - 2.11)</b>   | 0.09 (-1.03 - 0.97)          | -0.11 (-1.09 - 1.22)         | 0.46 (-1.34 - 2.42)          |
| GB0002R  | -0.05 (-0.69 - 0.14)         | 0.03 (-0.57 - 0.50)          | <b>-0.39 (-1.74 - -0.01)</b> | -0.05 (-0.90 - 0.17)         |
| GB0006R  | 0.38 (-0.75 - 1.14)          | <b>0.48 ( 0.00 - 0.83)</b>   | <b>-0.07 (-1.56 - 0.00)</b>  | 0.19 (-0.49 - 0.67)          |
| GB0013R  | 0.31 ( 0.00 - 0.62)          | 0.21 (-0.50 - 1.00)          | -0.22 (-1.85 - 0.74)         | 0.23 (-0.16 - 0.71)          |
| GB0014R  | <b>0.56 ( 0.00 - 0.96)</b>   | 0.28 (-0.76 - 1.01)          | -0.32 (-2.25 - 0.53)         | 0.16 (-0.34 - 0.69)          |
| GB0015R  | 0.31 (-0.17 - 0.65)          | <b>0.24 ( 0.11 - 0.78)</b>   | -0.17 (-1.32 - 0.86)         | -0.02 (-0.39 - 0.75)         |
| GB0031R  | <b>0.50 ( 0.00 - 0.85)</b>   | 0.46 ( 0.00 - 1.00)          | 0.01 (-1.66 - 1.40)          | <b>0.79 ( 0.00 - 1.28)</b>   |
| GB0033R  | 0.28 (-0.13 - 0.58)          | 0.01 (-0.45 - 0.41)          | <b>-0.21 (-1.69 - 0.33)</b>  | 0.29 (-0.14 - 0.53)          |
| GB0036R  | <b>0.45 ( 0.00 - 0.96)</b>   | 0.39 (-0.51 - 1.43)          | -0.18 (-2.20 - 0.50)         | 0.11 (-0.52 - 1.00)          |
| GB0037R  | 0.42 (-0.40 - 1.00)          | 0.33 (-0.45 - 1.05)          | -0.46 (-2.21 - 1.00)         | -0.03 (-0.87 - 0.76)         |
| GB0038R  | 0.42 (-0.19 - 0.84)          | 0.16 (-0.77 - 1.13)          | 0.00 (-2.13 - 1.27)          | 0.28 (-0.30 - 1.01)          |
| GB0039R  | 0.47 (-0.50 - 1.23)          | 0.29 (-0.10 - 1.53)          | -0.22 (-1.76 - 1.00)         | 0.21 (-0.33 - 1.02)          |
| GB0044R  | 0.00 (-0.43 - 0.49)          | 0.04 (-0.76 - 0.50)          | <b>-0.44 (-2.61 - -0.25)</b> | 0.05 (-0.57 - 0.56)          |
| GB0045R  | <b>0.57 ( 0.20 - 1.65)</b>   | <b>0.62 (-0.29 - 2.40)</b>   | 0.68 (-1.04 - 2.88)          | 0.60 (-0.53 - 1.75)          |
| GB0617A  | 0.12 (-0.45 - 0.34)          | -0.02 (-0.86 - 0.96)         | -0.16 (-1.69 - 0.50)         | -0.17 (-1.00 - 0.69)         |
| HPB      | 0.09 (-0.74 - 0.32)          | 0.16 (-0.44 - 1.43)          | 0.19 (-0.68 - 2.25)          | -0.06 (-1.10 - 0.82)         |
| HU0002R  | -0.27 (-1.98 - 1.49)         | <b>-1.88 (-4.04 - -0.99)</b> | -1.27 (-2.76 - 0.60)         | <b>-1.60 (-3.51 - -0.26)</b> |
| IE31     | 0.27 (-0.17 - 0.42)          | 0.28 (-0.39 - 0.65)          | <b>-0.17 (-1.74 - 0.00)</b>  | 0.05 (-0.28 - 0.33)          |
| IT04     | 0.76 (-0.55 - 2.96)          | 0.52 (-1.90 - 1.00)          | 0.07 (-2.73 - 0.76)          | -0.32 (-3.31 - 0.72)         |
| LT0015R  | 0.42 (-0.73 - 0.88)          | <b>0.68 ( 0.00 - 1.38)</b>   | 0.22 (-0.76 - 0.98)          | 0.06 (-1.46 - 1.78)          |
| LV0010R  | -0.02 (-0.95 - 0.70)         | 0.16 (-1.36 - 1.61)          | <b>-0.67 (-1.73 - -0.40)</b> | -0.65 (-1.45 - 0.21)         |
| NL0007R  | 0.18 (-0.48 - 0.92)          | 0.47 (-0.36 - 1.73)          | -0.02 (-1.85 - 1.30)         | -0.14 (-0.70 - 0.73)         |
| NL0009R  | <b>0.63 (-0.10 - 1.34)</b>   | <b>0.45 (-0.22 - 1.16)</b>   | 0.06 (-0.46 - 1.20)          | -0.14 (-0.77 - 0.69)         |
| NL0010R  | 0.19 (-0.37 - 1.31)          | 0.58 (-0.08 - 1.77)          | 0.16 (-1.06 - 1.50)          | -0.24 (-0.86 - 0.77)         |
| NL0196A  | -0.09 (-0.58 - 0.66)         | 0.33 (-0.63 - 1.98)          | -0.05 (-1.37 - 1.86)         | -0.08 (-0.84 - 0.68)         |
| NL0198A  | 0.02 (-0.76 - 1.02)          | 0.13 (-0.71 - 0.93)          | 0.16 (-1.20 - 2.18)          | -0.03 (-0.79 - 1.19)         |
| NL0202A  | 0.16 (-0.66 - 0.77)          | 0.36 (-0.80 - 1.83)          | 0.25 (-1.22 - 2.32)          | 0.01 (-1.09 - 0.69)          |
| NL0205A  | -0.15 (-0.52 - 0.59)         | 0.61 (-0.14 - 1.74)          | 0.37 (-1.01 - 2.55)          | -0.22 (-1.04 - 1.39)         |
| NL0207A  | 0.37 (-0.46 - 0.77)          | 0.29 (-0.33 - 1.16)          | 0.18 (-1.00 - 1.93)          | -0.11 (-0.95 - 0.71)         |
| NL0209A  | 0.20 (-0.60 - 0.72)          | 0.23 (-0.96 - 1.41)          | 0.08 (-1.19 - 1.88)          | -0.03 (-0.86 - 1.36)         |
| NL0220A  | 0.45 (-0.70 - 1.05)          | 0.11 (-0.65 - 0.86)          | -0.04 (-1.19 - 1.30)         | -0.30 (-0.93 - 0.39)         |
| NL0223A  | 0.00 (-0.80 - 0.49)          | 0.34 (-1.13 - 1.41)          | 0.20 (-1.90 - 1.53)          | 0.29 (-0.62 - 1.41)          |
| NL0226A  | -0.41 (-0.79 - 0.54)         | 0.30 (-0.50 - 1.39)          | 0.09 (-1.19 - 1.91)          | -0.25 (-0.81 - 1.25)         |
| NL0227A  | 0.45 (-0.31 - 0.82)          | 0.25 (-0.49 - 0.77)          | -0.17 (-1.17 - 0.44)         | -0.22 (-0.71 - 0.40)         |
| NL0228A  | 0.17 (-0.29 - 1.08)          | 0.37 (-0.16 - 1.01)          | 0.15 (-0.72 - 1.50)          | -0.10 (-0.67 - 0.81)         |
| NL0229A  | 0.45 (-0.35 - 1.33)          | 0.57 (-0.30 - 1.45)          | <b>0.67 (-0.44 - 2.48)</b>   | 0.30 (-0.23 - 1.39)          |
| NL0231A  | 0.02 (-0.63 - 0.47)          | 0.30 (-0.90 - 1.49)          | 0.08 (-1.25 - 1.77)          | -0.12 (-1.25 - 1.35)         |
| NL0232A  | 0.46 (-0.31 - 1.66)          | 0.19 (-0.54 - 1.11)          | -0.31 (-1.88 - 1.44)         | -0.14 (-1.23 - 0.50)         |
| NL0250A  | 0.18 (-0.27 - 1.00)          | 0.19 (-0.37 - 1.25)          | 0.14 (-0.43 - 2.25)          | -0.13 (-0.74 - 0.99)         |
| NO01     | 0.06 (-0.58 - 0.50)          | -0.35 (-0.63 - 0.42)         | <b>-0.39 (-1.40 - 0.13)</b>  | -0.05 (-0.25 - 0.52)         |

Table A7: continued. Quantification of trends (ppbv/yr) in seasonal O<sub>3</sub> 95<sup>th</sup> percentiles 1996-2005. 95% confidence interval are given in brackets. Values in bold indicate significant trends  $p < 0.1$ . † represents high altitude sites (>1000 m).

| ID      | Winter<br>(DJF)      | Spring<br>(MAM)      | Summer<br>(JJA)      | Autumn<br>(SON)             |
|---------|----------------------|----------------------|----------------------|-----------------------------|
| †PL03   | -0.32 (-0.80 - 0.52) | -0.59 (-1.14 - 0.39) | -0.32 (-1.40 - 0.65) | -0.19 (-1.00 - 1.15)        |
| PT0004R | -0.47 (-2.23 - 1.75) | -0.54 (-1.27 - 3.70) | 0.31 (-0.83 - 5.37)  | 0.20 (-1.93 - 2.90)         |
| †PUY    | -0.07 (-0.45 - 0.70) | -0.08 (-0.95 - 1.82) | 0.24 (-1.41 - 1.29)  | 0.14 (-0.79 - 1.17)         |
| SI0008R | 0.18 (-1.64 - 1.64)  | -0.51 (-0.85 - 1.02) | -0.42 (-0.83 - 1.51) | -0.59 (-2.62 - 0.09)        |
| †ZUG    | -0.40 (-0.59 - 0.14) | -0.14 (-0.83 - 0.61) | -0.25 (-0.99 - 0.73) | <b>-0.46 (-1.19 - 0.02)</b> |

## 4 CHIMERE model trends

A compilation of loess trends of monthly mean  $O_3$  for data extracted from CHIMERE CTM at the locations of all stations in this study are given in Figure ?? in addition to annual 5<sup>th</sup> and 95<sup>th</sup> percentiles of  $O_3$ . 75% coverage of monthly data was required to calculate statistics.

Quantification of trends in annual mean, 5<sup>th</sup> and 95<sup>th</sup> percentiles for data extracted from CHIMERE CTM at the locations of all stations in this study are given in Tables ?? - ??, respectively.

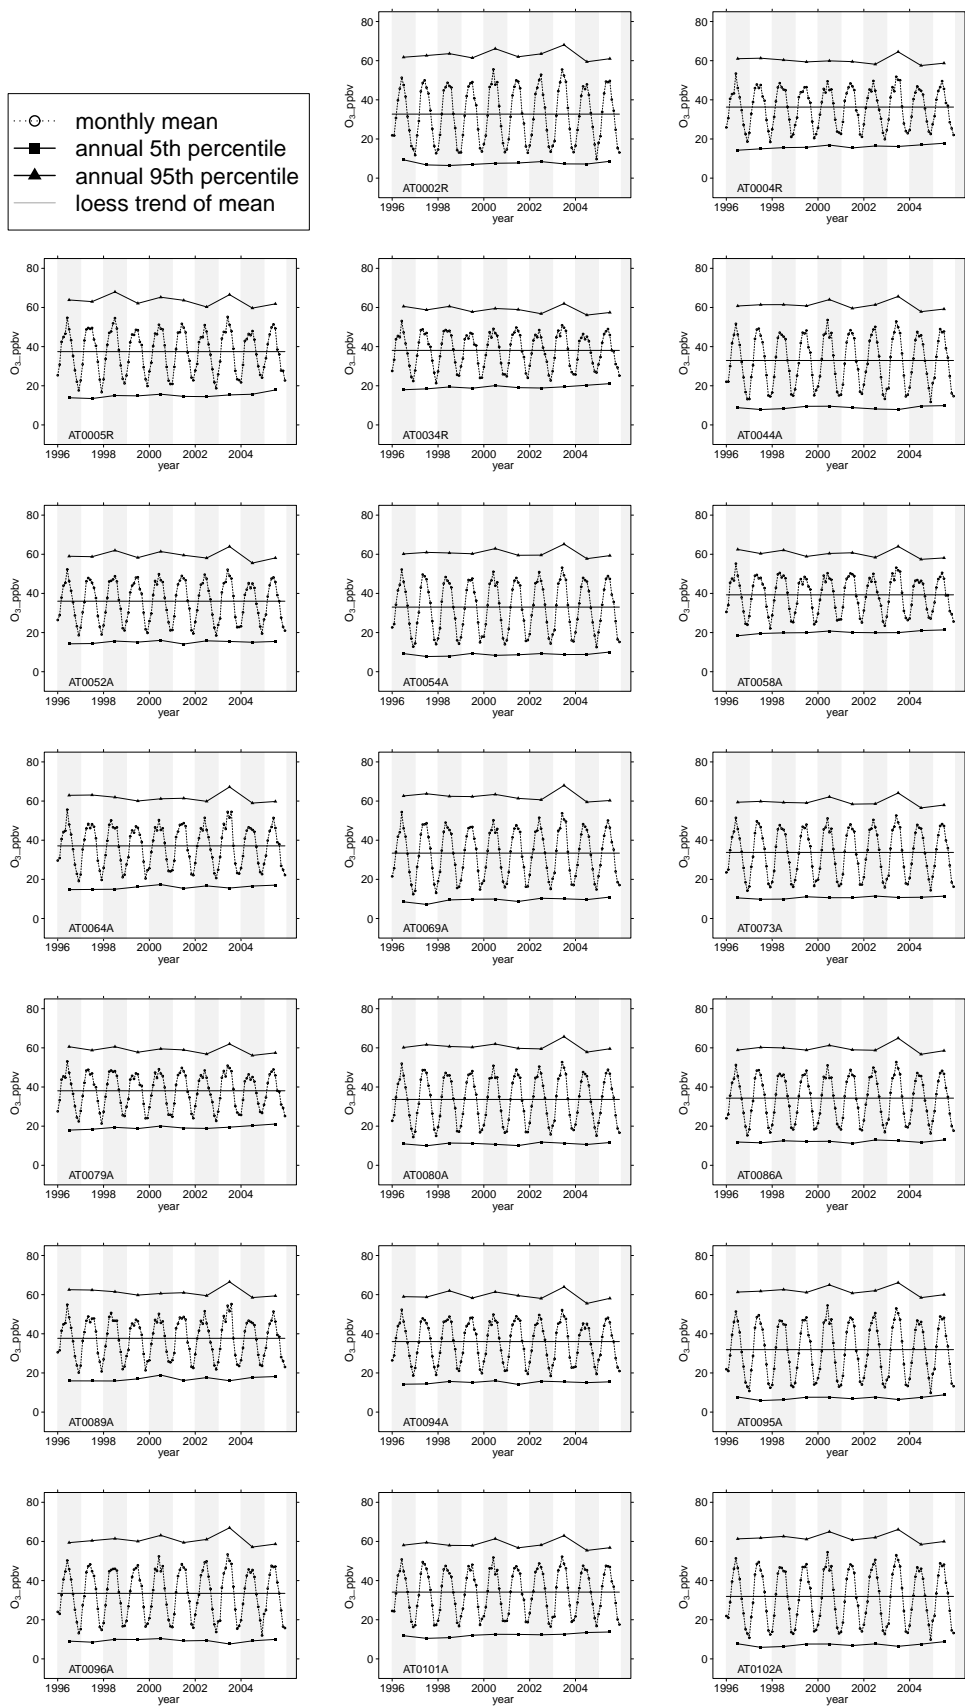

Figure B1: Loess trends of CHIMERE simulated monthly mean O<sub>3</sub>

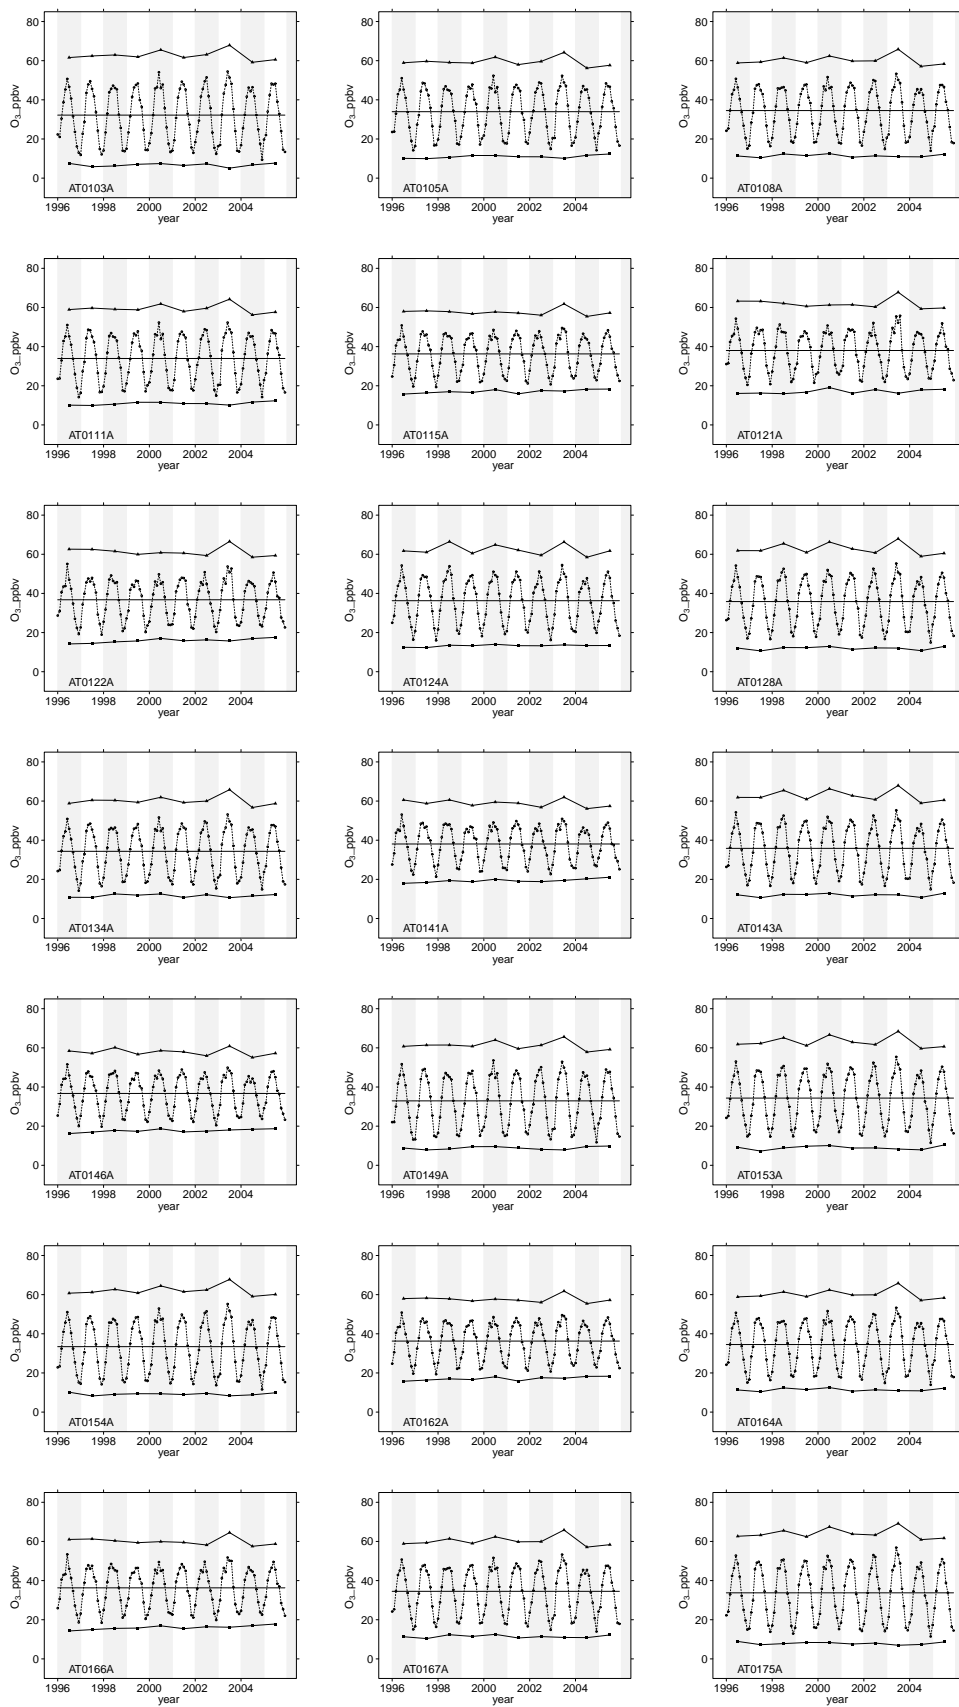

Figure B1: continued. Loess trends of CHIMERE simulated monthly mean  $O_3$

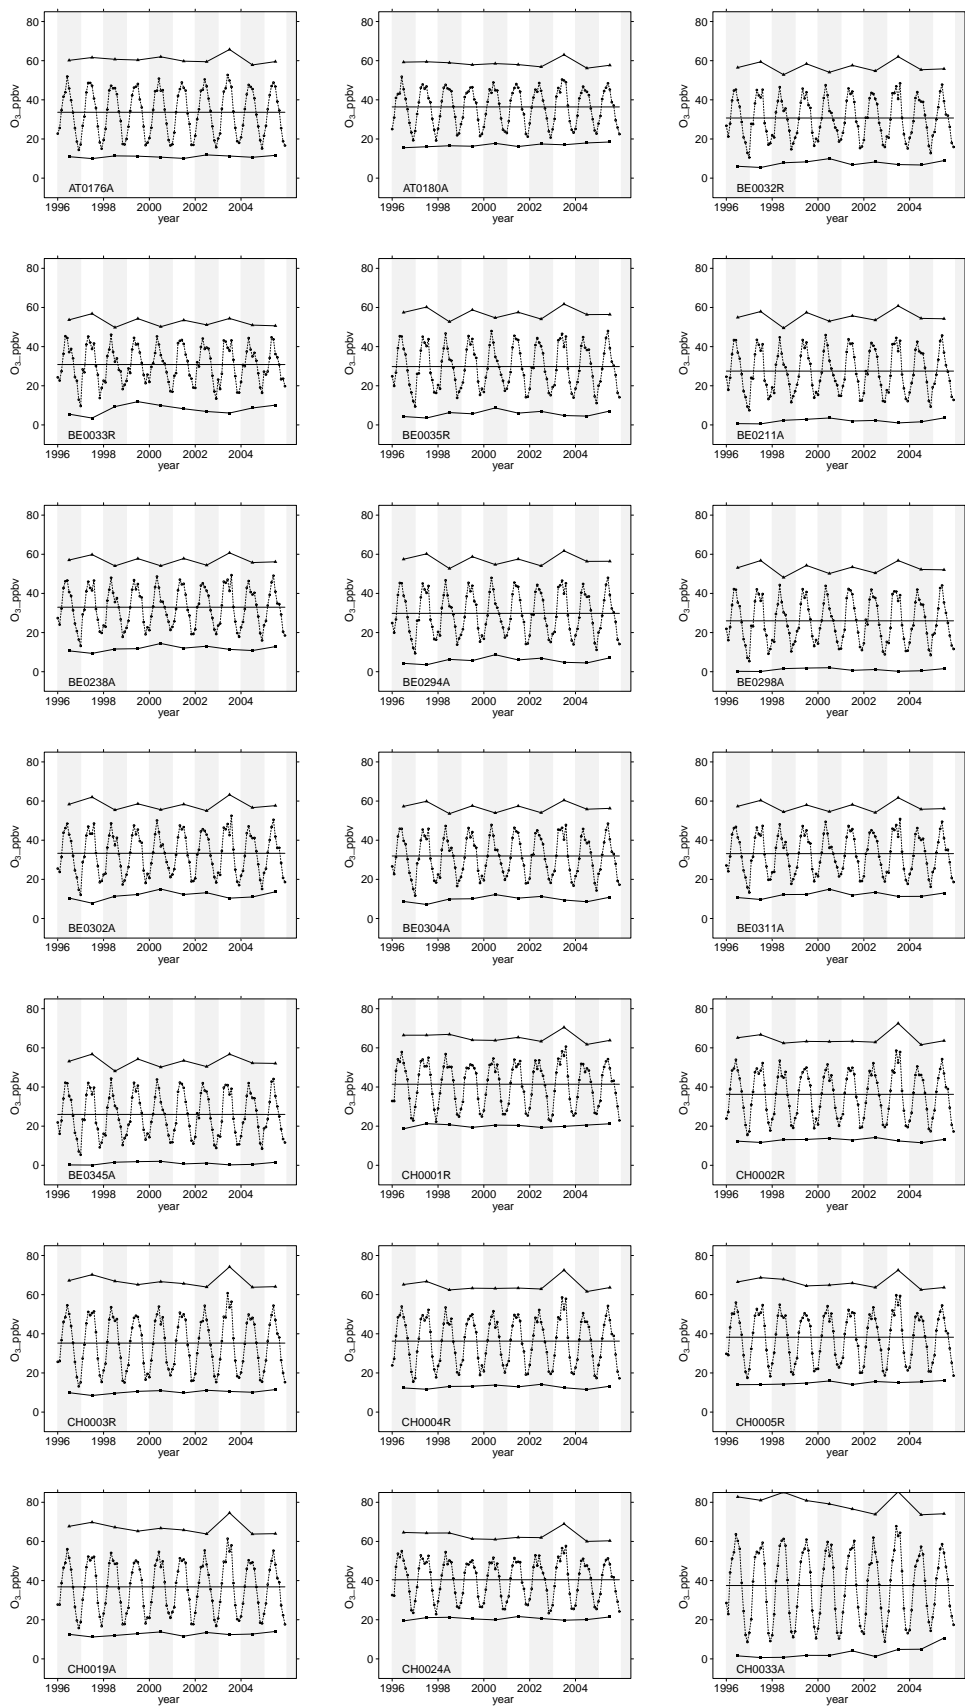

Figure B1: continued. Loess trends of CHIMERE simulated monthly mean  $O_3$

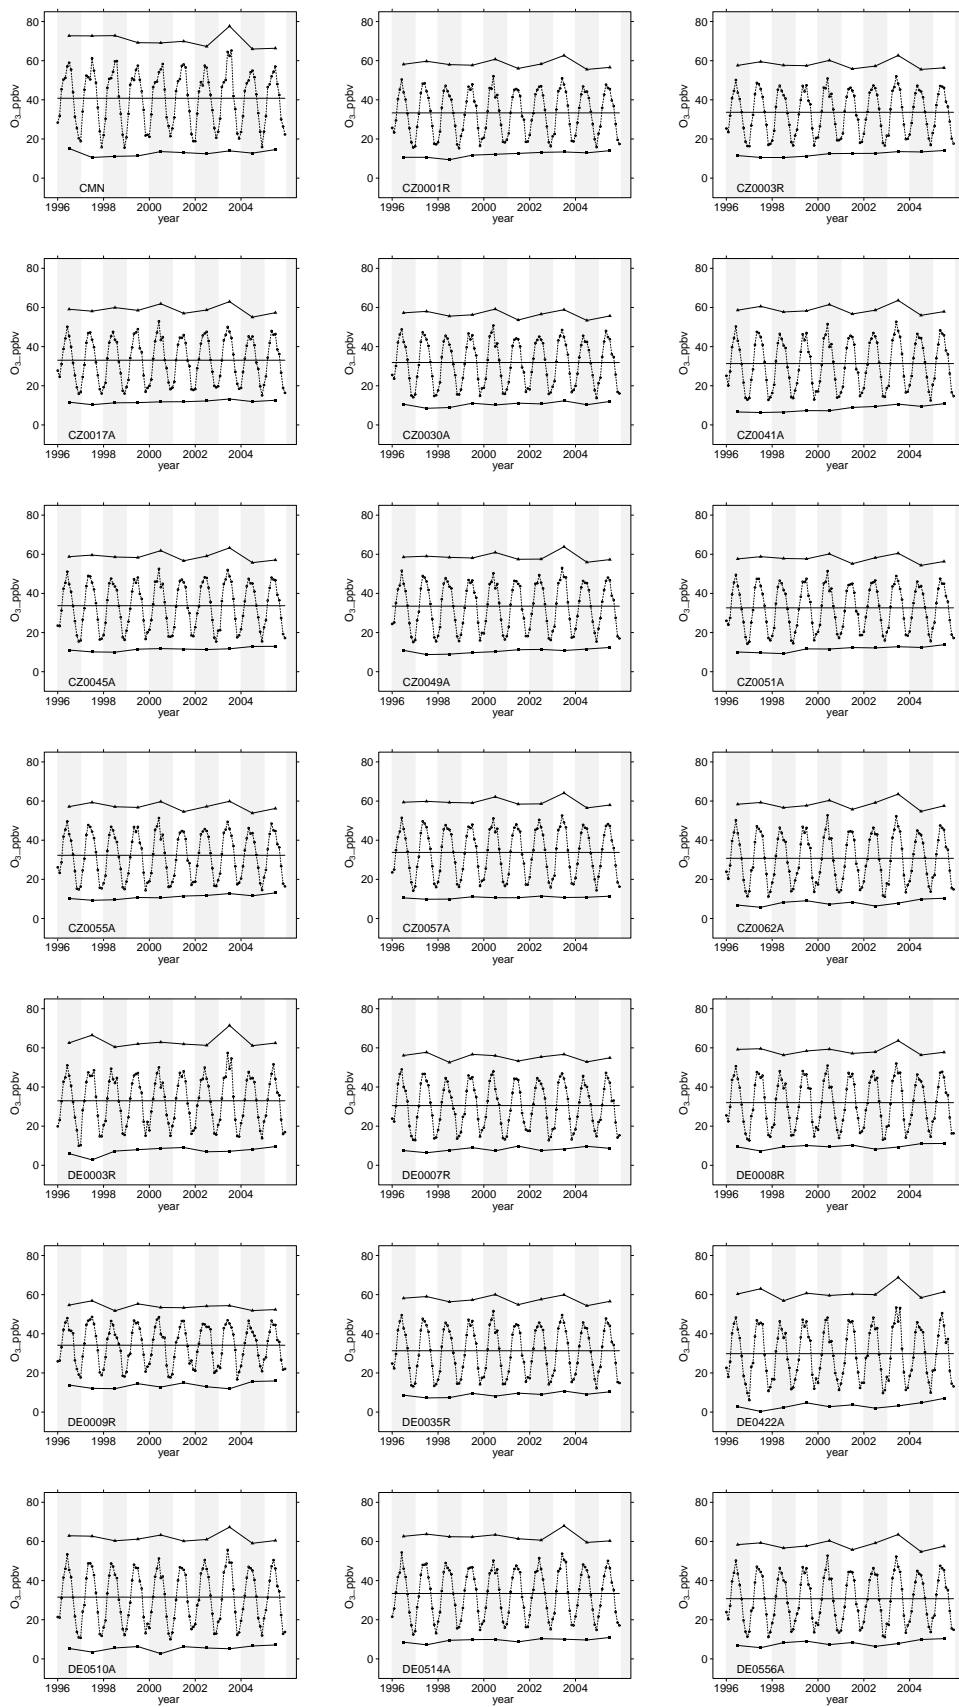

Figure B1: continued. Loess trends of CHIMERE simulated monthly mean  $O_3$



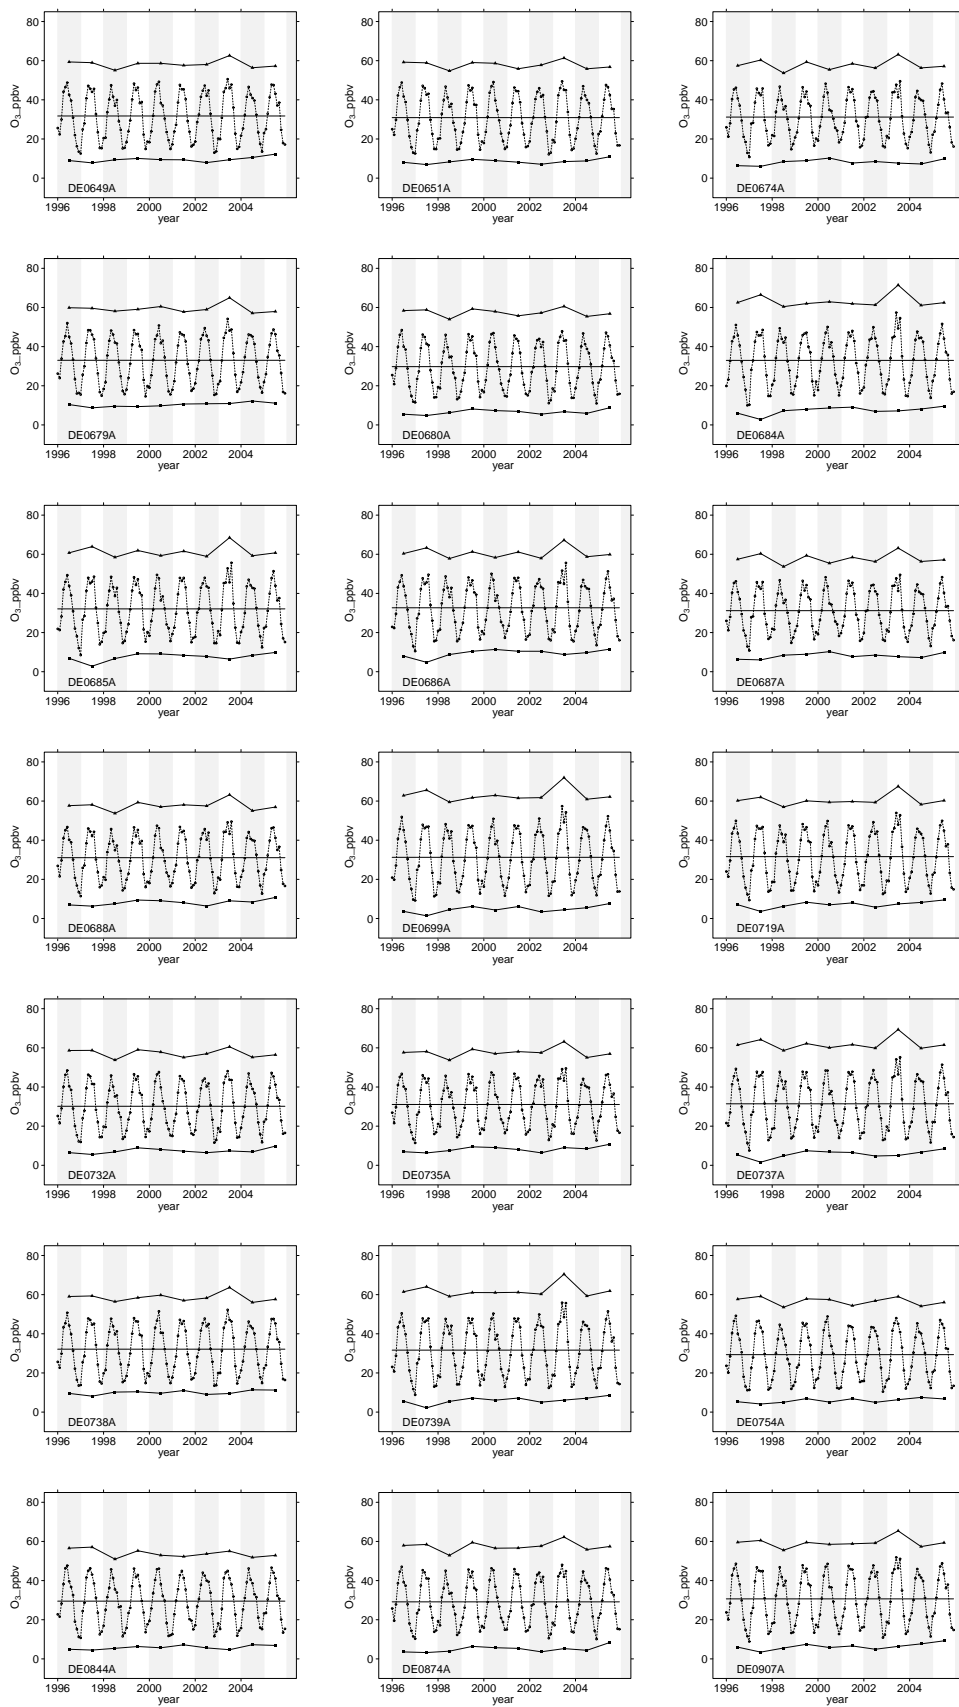

Figure B1: continued. Loess trends of CHIMERE simulated monthly mean  $O_3$

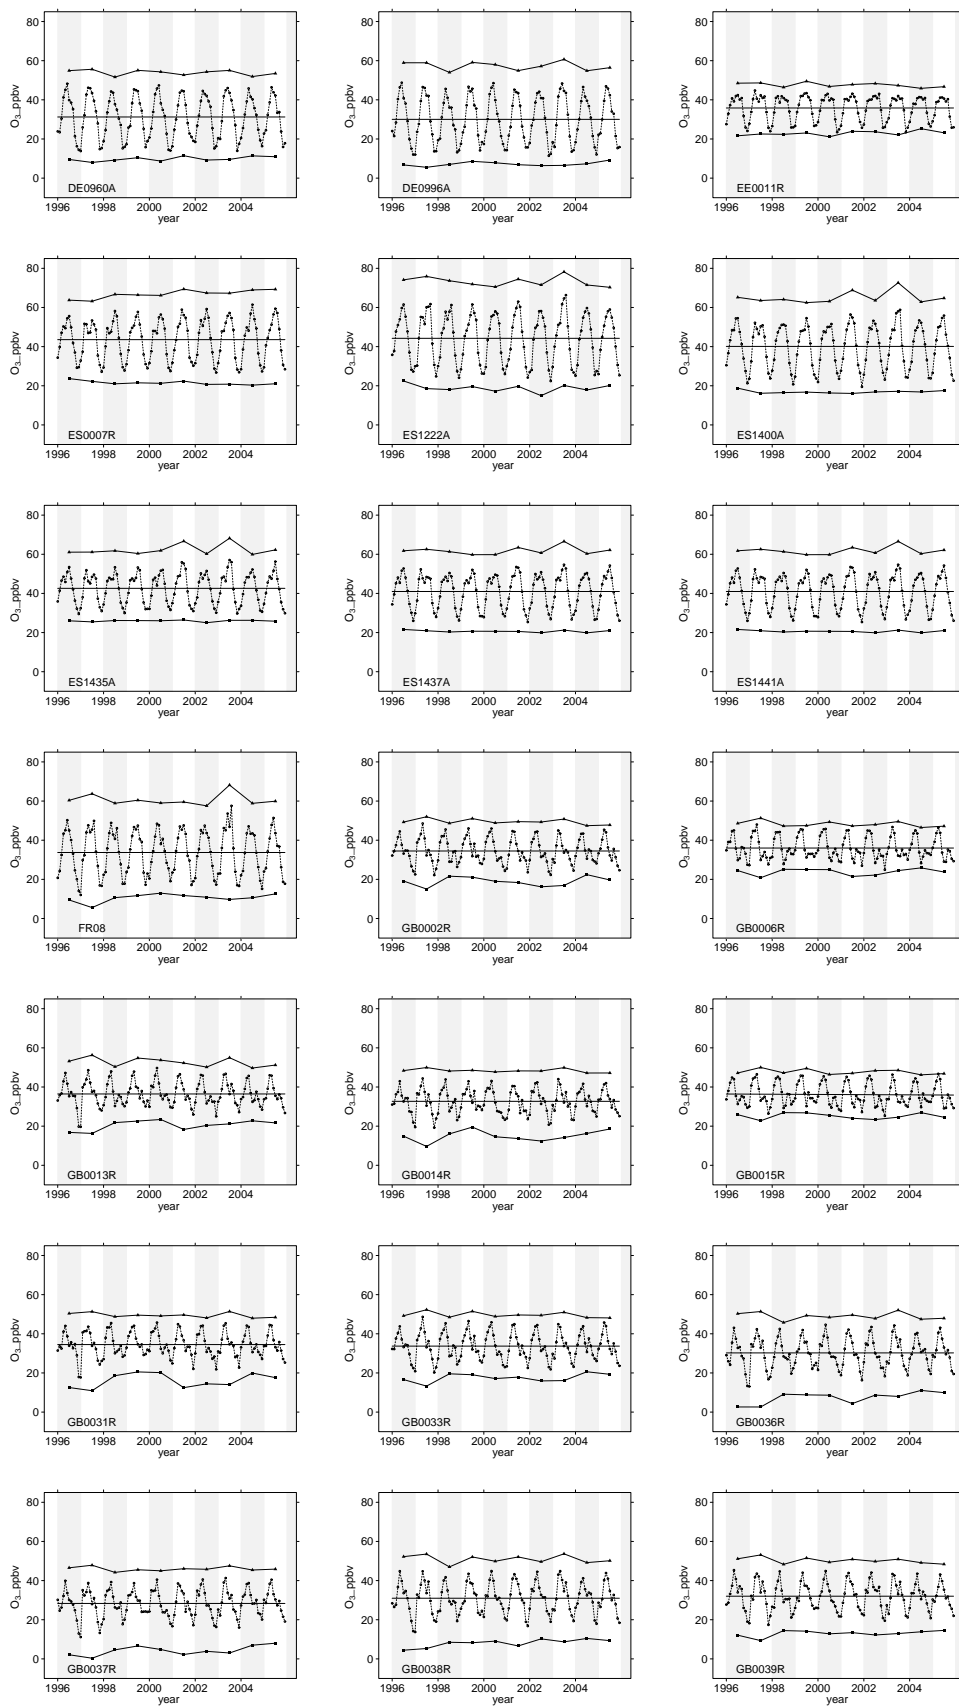

Figure B1: continued. Loess trends of CHIMERE simulated monthly mean  $O_3$

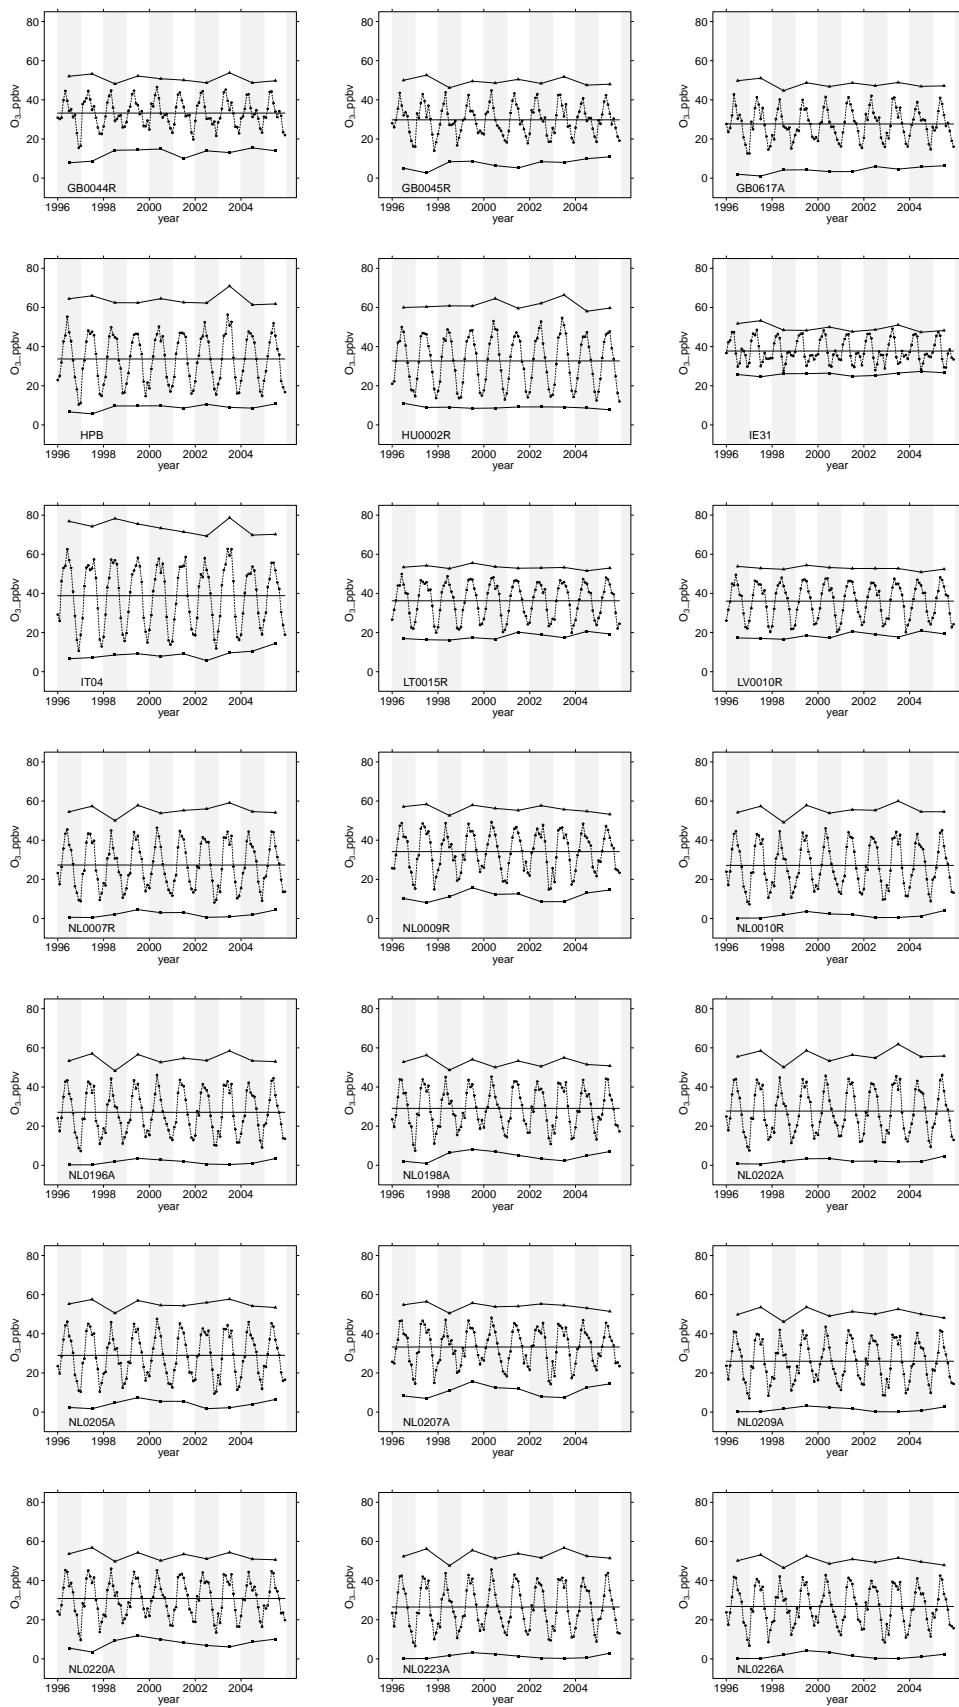

Figure B1: continued. Loess trends of CHIMERE simulated monthly mean O<sub>3</sub>

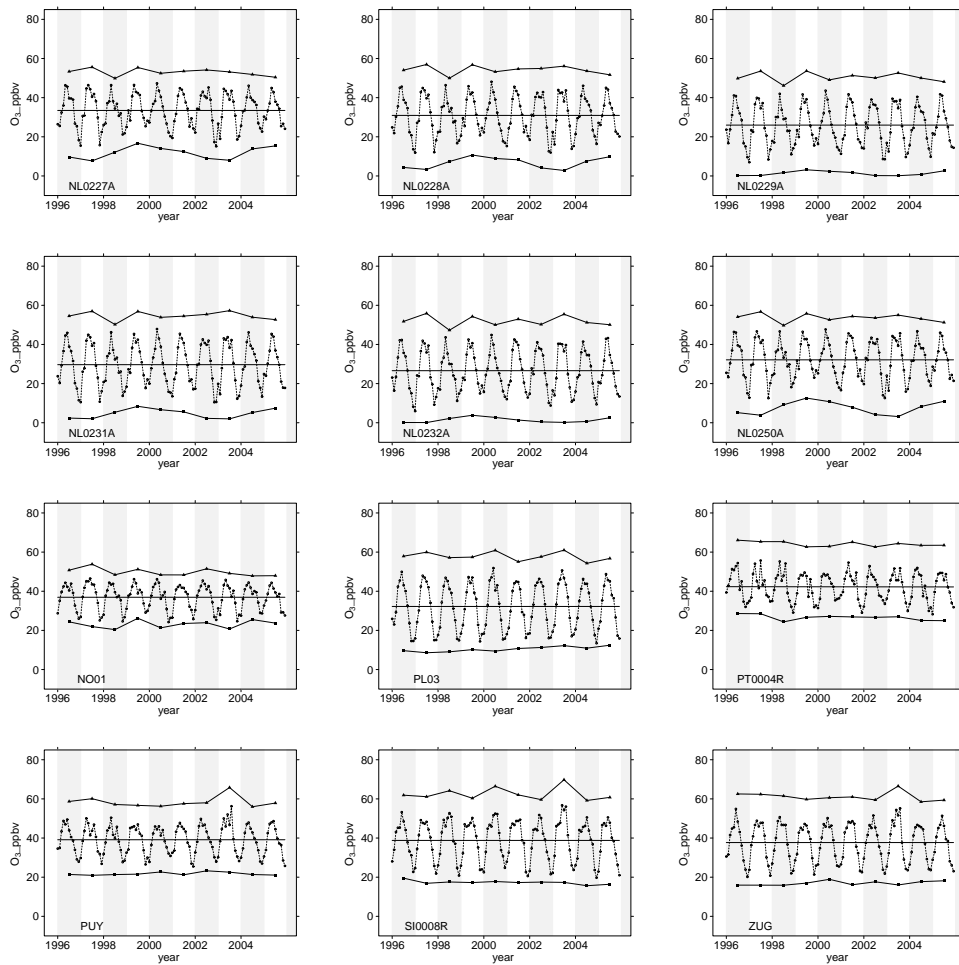

Figure B1: continued. Loess trends of CHIMERE simulated monthly mean  $O_3$

Table B1: Quantification of annual CHIMERE model trends (ppbv/yr and %/yr) in mean O<sub>3</sub> 1996-2005. 95% confidence interval given in brackets. Sig. = significance \*\*\* significant at 99.9% level, \*\* significant at 99.0% level, \* significant at 95.0% level, + significant at 90.0% level. ‡ 2σ error. ◊ significant trends only

| ID      | Trend (ppbv/yr)      | Sig. | P-value | Trend (%/yr)         | Sig. | P-value |
|---------|----------------------|------|---------|----------------------|------|---------|
| AT0002R | 0.07 (-0.03 - 0.18)  |      | 0.158   | 0.31 (-0.09 - 0.70)  |      | 0.140   |
| AT0004R | 0.07 (-0.03 - 0.17)  |      | 0.199   | 0.18 (-0.09 - 0.51)  |      | 0.207   |
| AT0005R | 0.04 (-0.09 - 0.16)  |      | 0.586   | 0.20 (-0.16 - 0.59)  |      | 0.345   |
| AT0034R | 0.04 (-0.07 - 0.15)  |      | 0.528   | 0.18 (-0.16 - 0.49)  |      | 0.261   |
| AT0044A | 0.11 (-0.02 - 0.22)  | +    | 0.077   | 0.49 ( 0.04 - 0.91)  | *    | 0.026   |
| AT0052A | -0.01 (-0.13 - 0.09) |      | 0.838   | 0.00 (-0.31 - 0.30)  |      | 0.993   |
| AT0054A | 0.09 ( 0.01 - 0.19)  | +    | 0.055   | 0.52 ( 0.12 - 0.96)  | *    | 0.010   |
| AT0058A | 0.00 (-0.11 - 0.11)  |      | 1.000   | 0.05 (-0.27 - 0.37)  |      | 0.768   |
| AT0064A | 0.02 (-0.11 - 0.14)  |      | 0.707   | 0.04 (-0.34 - 0.42)  |      | 0.842   |
| AT0069A | 0.11 ( 0.01 - 0.20)  | *    | 0.044   | 0.42 ( 0.02 - 0.83)  | *    | 0.023   |
| AT0073A | 0.10 ( 0.01 - 0.19)  | *    | 0.049   | 0.46 ( 0.15 - 0.81)  | **   | 0.005   |
| AT0079A | 0.04 (-0.07 - 0.15)  |      | 0.528   | 0.18 (-0.16 - 0.49)  |      | 0.261   |
| AT0080A | 0.05 (-0.04 - 0.13)  |      | 0.310   | 0.21 (-0.04 - 0.51)  |      | 0.113   |
| AT0086A | 0.06 (-0.03 - 0.14)  |      | 0.247   | 0.26 (-0.01 - 0.53)  | +    | 0.068   |
| AT0089A | 0.02 (-0.11 - 0.13)  |      | 0.779   | 0.05 (-0.33 - 0.38)  |      | 0.754   |
| AT0094A | -0.01 (-0.13 - 0.09) |      | 0.838   | 0.00 (-0.31 - 0.30)  |      | 0.993   |
| AT0095A | 0.11 ( 0.00 - 0.22)  | +    | 0.052   | 0.56 ( 0.13 - 1.02)  | *    | 0.012   |
| AT0096A | 0.08 (-0.08 - 0.21)  |      | 0.312   | 0.23 (-0.18 - 0.68)  |      | 0.246   |
| AT0101A | 0.16 ( 0.06 - 0.26)  | **   | 0.003   | 0.67 ( 0.38 - 1.01)  | ***  | <0.001  |
| AT0102A | 0.11 ( 0.00 - 0.22)  | +    | 0.052   | 0.56 ( 0.13 - 1.02)  | *    | 0.012   |
| AT0103A | 0.09 (-0.03 - 0.21)  |      | 0.114   | 0.35 (-0.08 - 0.81)  |      | 0.119   |
| AT0105A | 0.10 (-0.02 - 0.22)  |      | 0.101   | 0.39 ( 0.02 - 0.80)  | *    | 0.035   |
| AT0108A | 0.04 (-0.08 - 0.17)  |      | 0.386   | 0.17 (-0.23 - 0.56)  |      | 0.343   |
| AT0111A | 0.10 (-0.02 - 0.22)  |      | 0.101   | 0.39 ( 0.02 - 0.80)  | *    | 0.035   |
| AT0115A | 0.07 (-0.03 - 0.15)  |      | 0.211   | 0.26 (-0.03 - 0.52)  | +    | 0.099   |
| AT0121A | -0.01 (-0.15 - 0.11) |      | 0.842   | -0.01 (-0.41 - 0.36) |      | 0.939   |
| AT0122A | 0.08 (-0.04 - 0.19)  |      | 0.199   | 0.25 (-0.11 - 0.59)  |      | 0.166   |
| AT0124A | -0.04 (-0.17 - 0.06) |      | 0.417   | -0.14 (-0.50 - 0.23) |      | 0.438   |
| AT0128A | -0.01 (-0.15 - 0.11) |      | 0.796   | 0.00 (-0.42 - 0.35)  |      | 0.996   |
| AT0134A | 0.07 (-0.05 - 0.18)  |      | 0.235   | 0.19 (-0.14 - 0.57)  |      | 0.270   |
| AT0141A | 0.04 (-0.07 - 0.15)  |      | 0.528   | 0.18 (-0.16 - 0.49)  |      | 0.261   |
| AT0143A | -0.01 (-0.15 - 0.11) |      | 0.796   | 0.00 (-0.42 - 0.35)  |      | 0.996   |
| AT0146A | 0.03 (-0.08 - 0.13)  |      | 0.589   | 0.11 (-0.19 - 0.42)  |      | 0.482   |
| AT0149A | 0.11 (-0.02 - 0.22)  | +    | 0.077   | 0.49 ( 0.04 - 0.91)  | *    | 0.026   |
| AT0153A | 0.03 (-0.10 - 0.15)  |      | 0.599   | 0.23 (-0.22 - 0.60)  |      | 0.217   |
| AT0154A | 0.06 (-0.05 - 0.17)  |      | 0.262   | 0.23 (-0.14 - 0.60)  |      | 0.174   |
| AT0162A | 0.07 (-0.03 - 0.15)  |      | 0.211   | 0.26 (-0.03 - 0.52)  | +    | 0.099   |
| AT0164A | 0.04 (-0.08 - 0.17)  |      | 0.386   | 0.17 (-0.23 - 0.56)  |      | 0.343   |
| AT0166A | 0.07 (-0.03 - 0.17)  |      | 0.199   | 0.18 (-0.09 - 0.51)  |      | 0.207   |
| AT0167A | 0.04 (-0.08 - 0.17)  |      | 0.386   | 0.17 (-0.23 - 0.56)  |      | 0.343   |
| AT0175A | 0.01 (-0.10 - 0.11)  |      | 0.810   | 0.21 (-0.20 - 0.53)  |      | 0.211   |
| AT0176A | 0.05 (-0.04 - 0.13)  |      | 0.310   | 0.21 (-0.04 - 0.51)  |      | 0.113   |

Table B1: continued. Quantification of annual CHIMERE model trends (ppbv/yr and %/yr) in mean O<sub>3</sub> 1996-2005. 95% confidence interval given in brackets. Sig. = significance \*\*\* significant at 99.9% level, \*\* significant at 99.0% level, \* significant at 95.0% level, + significant at 90.0% level. † 2σ error. ◊ significant trends only

| ID      | Trend (ppbv/yr)      | Sig. | P-value | Trend (%/yr)         | Sig. | P-value |
|---------|----------------------|------|---------|----------------------|------|---------|
| AT0180A | 0.07 (-0.03 - 0.16)  |      | 0.174   | 0.22 (-0.05 - 0.51)  |      | 0.138   |
| BE0032R | 0.07 (-0.09 - 0.19)  |      | 0.350   | 0.55 (-0.16 - 1.10)  |      | 0.110   |
| BE0033R | -0.04 (-0.19 - 0.15) |      | 0.683   | 0.18 (-0.58 - 0.99)  |      | 0.647   |
| BE0035R | 0.05 (-0.10 - 0.17)  |      | 0.449   | 0.72 (-0.11 - 1.41)  | +    | 0.063   |
| BE0211A | 0.05 (-0.10 - 0.18)  |      | 0.471   | 0.94 (-0.17 - 2.08)  | +    | 0.093   |
| BE0238A | 0.05 (-0.09 - 0.16)  |      | 0.401   | 0.32 (-0.19 - 0.72)  |      | 0.164   |
| BE0294A | 0.05 (-0.10 - 0.17)  |      | 0.449   | 0.72 (-0.11 - 1.41)  | +    | 0.063   |
| BE0298A | 0.04 (-0.11 - 0.19)  |      | 0.583   | 0.80 (-0.52 - 2.08)  |      | 0.188   |
| BE0302A | 0.05 (-0.09 - 0.17)  |      | 0.404   | 0.35 (-0.12 - 0.77)  |      | 0.117   |
| BE0304A | 0.06 (-0.07 - 0.17)  |      | 0.391   | 0.36 (-0.24 - 0.84)  |      | 0.194   |
| BE0311A | 0.04 (-0.09 - 0.16)  |      | 0.482   | 0.34 (-0.26 - 0.78)  |      | 0.176   |
| BE0345A | 0.04 (-0.11 - 0.19)  |      | 0.583   | 0.80 (-0.52 - 2.08)  |      | 0.188   |
| CH0001R | -0.06 (-0.23 - 0.09) |      | 0.371   | -0.13 (-0.58 - 0.34) |      | 0.549   |
| CH0002R | -0.06 (-0.17 - 0.05) |      | 0.314   | -0.10 (-0.52 - 0.31) |      | 0.565   |
| CH0003R | -0.01 (-0.14 - 0.11) |      | 0.860   | 0.20 (-0.18 - 0.70)  |      | 0.338   |
| CH0004R | -0.06 (-0.17 - 0.05) |      | 0.314   | -0.10 (-0.52 - 0.31) |      | 0.565   |
| CH0005R | -0.02 (-0.17 - 0.11) |      | 0.779   | 0.04 (-0.42 - 0.54)  |      | 0.874   |
| CH0019A | -0.03 (-0.16 - 0.10) |      | 0.713   | 0.17 (-0.22 - 0.61)  |      | 0.430   |
| CH0024A | -0.12 (-0.25 - 0.02) | +    | 0.091   | -0.33 (-0.67 - 0.06) | +    | 0.060   |
| CH0033A | 0.07 (-0.18 - 0.27)  |      | 0.528   | 0.90 ( 0.00 - 2.11)  | *    | 0.035   |
| CMN     | -0.12 (-0.26 - 0.01) | +    | 0.074   | -0.19 (-0.51 - 0.22) |      | 0.274   |
| CZ0001R | 0.20 ( 0.10 - 0.30)  | ***  | <0.001  | 0.94 ( 0.54 - 1.33)  | ***  | <0.001  |
| CZ0003R | 0.21 ( 0.11 - 0.31)  | ***  | <0.001  | 0.91 ( 0.59 - 1.31)  | ***  | <0.001  |
| CZ0017A | 0.16 ( 0.03 - 0.27)  | **   | 0.006   | 0.74 ( 0.33 - 1.09)  | ***  | <0.001  |
| CZ0030A | 0.13 ( 0.02 - 0.22)  | *    | 0.020   | 0.77 ( 0.33 - 1.21)  | ***  | 0.001   |
| CZ0041A | 0.32 ( 0.19 - 0.43)  | ***  | <0.001  | 1.84 ( 1.20 - 2.44)  | ***  | <0.001  |
| CZ0045A | 0.17 ( 0.06 - 0.27)  | **   | 0.005   | 0.72 ( 0.37 - 1.12)  | ***  | <0.001  |
| CZ0049A | 0.15 ( 0.05 - 0.24)  | **   | 0.007   | 0.72 ( 0.32 - 1.15)  | ***  | <0.001  |
| CZ0051A | 0.17 ( 0.06 - 0.27)  | **   | 0.002   | 0.87 ( 0.45 - 1.32)  | ***  | <0.001  |
| CZ0055A | 0.18 ( 0.07 - 0.28)  | **   | 0.001   | 0.96 ( 0.53 - 1.46)  | ***  | <0.001  |
| CZ0057A | 0.10 ( 0.01 - 0.19)  | *    | 0.049   | 0.46 ( 0.15 - 0.81)  | **   | 0.005   |
| CZ0062A | 0.19 ( 0.04 - 0.32)  | *    | 0.012   | 1.09 ( 0.40 - 1.86)  | **   | 0.002   |
| DE0003R | 0.06 (-0.06 - 0.18)  |      | 0.314   | 0.62 ( 0.14 - 1.22)  | **   | 0.009   |
| DE0007R | -0.02 (-0.14 - 0.10) |      | 0.810   | 0.32 (-0.20 - 0.96)  |      | 0.264   |
| DE0008R | 0.11 (-0.01 - 0.24)  |      | 0.102   | 0.61 ( 0.15 - 1.17)  | *    | 0.014   |
| DE0009R | 0.00 (-0.15 - 0.13)  |      | 0.986   | 0.20 (-0.30 - 0.73)  |      | 0.425   |
| DE0035R | 0.12 ( 0.01 - 0.22)  | *    | 0.027   | 0.81 ( 0.36 - 1.36)  | ***  | 0.001   |
| DE0422A | 0.20 ( 0.04 - 0.35)  | *    | 0.013   | 1.40 ( 0.50 - 2.60)  | **   | 0.002   |
| DE0510A | 0.10 (-0.02 - 0.22)  |      | 0.102   | 0.50 (-0.04 - 1.13)  | +    | 0.086   |
| DE0514A | 0.11 ( 0.01 - 0.20)  | *    | 0.044   | 0.42 ( 0.02 - 0.83)  | *    | 0.023   |
| DE0556A | 0.19 ( 0.04 - 0.32)  | *    | 0.012   | 1.09 ( 0.40 - 1.86)  | **   | 0.002   |
| DE0649A | 0.14 ( 0.01 - 0.27)  | *    | 0.045   | 0.73 ( 0.17 - 1.41)  | **   | 0.008   |

Table B1: continued. Quantification of annual CHIMERE model trends (ppbv/yr and %/yr) in mean O<sub>3</sub> 1996-2005. 95% confidence interval given in brackets. Sig. = significance \*\*\* significant at 99.9% level, \*\* significant at 99.0% level, \* significant at 95.0% level, + significant at 90.0% level. ‡ 2σ error. ◊ significant trends only

| ID      | Trend (ppbv/yr)      | Sig. | P-value | Trend (%/yr)         | Sig. | P-value |
|---------|----------------------|------|---------|----------------------|------|---------|
| DE0651A | 0.10 (-0.02 - 0.22)  |      | 0.101   | 0.61 ( 0.11 - 1.18)  | *    | 0.012   |
| DE0674A | 0.08 (-0.06 - 0.20)  |      | 0.221   | 0.62 (-0.01 - 1.09)  | +    | 0.054   |
| DE0679A | 0.11 ( 0.01 - 0.22)  | +    | 0.054   | 0.64 ( 0.17 - 1.10)  | **   | 0.007   |
| DE0680A | 0.10 (-0.03 - 0.22)  |      | 0.129   | 0.85 ( 0.19 - 1.55)  | *    | 0.013   |
| DE0684A | 0.06 (-0.06 - 0.18)  |      | 0.314   | 0.62 ( 0.14 - 1.22)  | **   | 0.009   |
| DE0685A | 0.08 (-0.06 - 0.24)  |      | 0.246   | 0.72 ( 0.06 - 1.50)  | *    | 0.027   |
| DE0686A | 0.07 (-0.07 - 0.21)  |      | 0.305   | 0.57 (-0.02 - 1.12)  | +    | 0.053   |
| DE0687A | 0.08 (-0.06 - 0.20)  |      | 0.221   | 0.62 (-0.01 - 1.09)  | +    | 0.054   |
| DE0688A | 0.15 ( 0.02 - 0.27)  | *    | 0.024   | 0.89 ( 0.25 - 1.71)  | **   | 0.005   |
| DE0699A | 0.13 (-0.01 - 0.27)  | +    | 0.075   | 0.96 ( 0.24 - 1.67)  | **   | 0.005   |
| DE0719A | 0.13 (-0.01 - 0.27)  | +    | 0.078   | 1.04 ( 0.26 - 1.78)  | **   | 0.007   |
| DE0732A | 0.11 (-0.01 - 0.23)  | +    | 0.089   | 0.80 ( 0.20 - 1.41)  | *    | 0.010   |
| DE0735A | 0.15 ( 0.02 - 0.27)  | *    | 0.024   | 0.89 ( 0.25 - 1.71)  | **   | 0.005   |
| DE0737A | 0.11 (-0.02 - 0.27)  |      | 0.137   | 1.02 ( 0.12 - 1.94)  | *    | 0.017   |
| DE0738A | 0.11 (-0.01 - 0.24)  | +    | 0.092   | 0.65 ( 0.18 - 1.21)  | **   | 0.010   |
| DE0739A | 0.11 (-0.03 - 0.26)  |      | 0.164   | 0.94 ( 0.18 - 1.64)  | *    | 0.010   |
| DE0754A | 0.03 (-0.11 - 0.16)  |      | 0.676   | 0.60 (-0.05 - 1.31)  | +    | 0.100   |
| DE0844A | 0.02 (-0.14 - 0.15)  |      | 0.806   | 0.41 (-0.25 - 1.11)  |      | 0.280   |
| DE0874A | 0.16 ( 0.02 - 0.27)  | *    | 0.020   | 1.46 ( 0.47 - 2.57)  | ***  | 0.001   |
| DE0907A | 0.17 ( 0.03 - 0.32)  | *    | 0.025   | 1.27 ( 0.45 - 2.10)  | **   | 0.002   |
| DE0960A | 0.00 (-0.13 - 0.12)  |      | 0.989   | 0.26 (-0.27 - 0.75)  |      | 0.336   |
| DE0996A | 0.07 (-0.05 - 0.20)  |      | 0.253   | 0.56 ( 0.05 - 1.16)  | *    | 0.044   |
| EE0011R | -0.02 (-0.08 - 0.04) |      | 0.589   | 0.00 (-0.17 - 0.19)  |      | 0.975   |
| ES0007R | 0.11 (-0.02 - 0.23)  | +    | 0.086   | 0.18 (-0.13 - 0.47)  |      | 0.240   |
| ES1222A | -0.08 (-0.23 - 0.08) |      | 0.312   | -0.16 (-0.67 - 0.30) |      | 0.476   |
| ES1400A | 0.03 (-0.09 - 0.15)  |      | 0.555   | 0.09 (-0.25 - 0.38)  |      | 0.561   |
| ES1435A | -0.01 (-0.08 - 0.08) |      | 0.821   | 0.01 (-0.19 - 0.20)  |      | 0.903   |
| ES1437A | -0.02 (-0.13 - 0.09) |      | 0.720   | -0.03 (-0.31 - 0.23) |      | 0.863   |
| ES1441A | -0.02 (-0.13 - 0.09) |      | 0.720   | -0.03 (-0.31 - 0.23) |      | 0.863   |
| FR08    | 0.06 (-0.07 - 0.19)  |      | 0.374   | 0.45 (-0.12 - 0.95)  |      | 0.105   |
| GB0002R | -0.04 (-0.16 - 0.08) |      | 0.425   | -0.12 (-0.45 - 0.31) |      | 0.618   |
| GB0006R | -0.08 (-0.17 - 0.03) |      | 0.121   | -0.18 (-0.49 - 0.12) |      | 0.224   |
| GB0013R | -0.07 (-0.18 - 0.05) |      | 0.246   | -0.06 (-0.44 - 0.33) |      | 0.768   |
| GB0014R | 0.06 (-0.06 - 0.18)  |      | 0.350   | 0.27 (-0.16 - 0.81)  |      | 0.246   |
| GB0015R | -0.09 (-0.18 - 0.00) | *    | 0.039   | -0.25 (-0.50 - 0.01) | +    | 0.052   |
| GB0031R | -0.03 (-0.18 - 0.12) |      | 0.644   | -0.11 (-0.64 - 0.47) |      | 0.683   |
| GB0033R | 0.02 (-0.10 - 0.14)  |      | 0.680   | 0.14 (-0.26 - 0.62)  |      | 0.485   |
| GB0036R | 0.14 (-0.02 - 0.30)  | +    | 0.097   | 0.75 (-0.09 - 1.89)  | +    | 0.072   |
| GB0037R | 0.19 ( 0.03 - 0.36)  | *    | 0.024   | 1.46 ( 0.63 - 2.45)  | **   | 0.001   |
| GB0038R | 0.11 (-0.02 - 0.24)  |      | 0.140   | 1.19 ( 0.36 - 2.10)  | **   | 0.005   |
| GB0039R | -0.04 (-0.17 - 0.11) |      | 0.583   | 0.03 (-0.48 - 0.61)  |      | 0.899   |
| GB0044R | 0.01 (-0.14 - 0.17)  |      | 0.899   | 0.36 (-0.35 - 1.09)  |      | 0.268   |

Table B1: continued. Quantification of annual CHIMERE model trends (ppbv/yr and %/yr) in mean O<sub>3</sub> 1996-2005. 95% confidence interval given in brackets. Sig. = significance \*\*\* significant at 99.9% level, \*\* significant at 99.0% level, \* significant at 95.0% level, + significant at 90.0% level. † 2σ error. ◊ significant trends only

| ID                            | Trend (ppbv/yr)       | Sig. | P-value | Trend (%/yr)         | Sig. | P-value |
|-------------------------------|-----------------------|------|---------|----------------------|------|---------|
| GB0045R                       | 0.12 (-0.02 - 0.26)   |      | 0.117   | 1.25 ( 0.18 - 2.34)  | *    | 0.021   |
| GB0617A                       | 0.10 (-0.04 - 0.26)   |      | 0.144   | 1.48 ( 0.39 - 2.56)  | **   | 0.009   |
| HPB                           | 0.06 (-0.05 - 0.17)   |      | 0.268   | 0.42 (-0.02 - 0.90)  | +    | 0.072   |
| HU0002R                       | -0.02 (-0.13 - 0.08)  |      | 0.660   | -0.03 (-0.50 - 0.37) |      | 0.845   |
| IE31                          | -0.08 (-0.14 - 0.01)  | +    | 0.064   | -0.17 (-0.34 - 0.05) | +    | 0.086   |
| IT04                          | 0.00 (-0.23 - 0.20)   |      | 0.993   | 0.21 (-0.38 - 0.90)  |      | 0.462   |
| LT0015R                       | 0.00 (-0.09 - 0.09)   |      | 0.986   | 0.06 (-0.21 - 0.32)  |      | 0.637   |
| LV0010R                       | 0.01 (-0.07 - 0.09)   |      | 0.824   | 0.11 (-0.16 - 0.36)  |      | 0.427   |
| NL0007R                       | 0.06 (-0.10 - 0.22)   |      | 0.474   | 0.48 (-0.59 - 1.74)  |      | 0.406   |
| NL0009R                       | 0.00 (-0.17 - 0.16)   |      | 0.978   | 0.24 (-0.45 - 1.02)  |      | 0.502   |
| NL0010R                       | 0.08 (-0.08 - 0.22)   |      | 0.284   | 0.66 (-0.34 - 1.74)  |      | 0.187   |
| NL0196A                       | 0.05 (-0.11 - 0.19)   |      | 0.514   | 0.36 (-0.68 - 1.39)  |      | 0.485   |
| NL0198A                       | -0.02 (-0.18 - 0.17)  |      | 0.877   | 0.56 (-0.37 - 1.57)  |      | 0.255   |
| NL0202A                       | 0.10 (-0.06 - 0.23)   |      | 0.187   | 1.00 (-0.10 - 2.15)  | +    | 0.060   |
| NL0205A                       | 0.03 (-0.15 - 0.19)   |      | 0.758   | 0.62 (-0.29 - 1.60)  |      | 0.157   |
| NL0207A                       | 0.01 (-0.18 - 0.19)   |      | 0.953   | 0.27 (-0.45 - 1.12)  |      | 0.528   |
| NL0209A                       | 0.00 (-0.18 - 0.17)   |      | 0.989   | -0.04 (-1.22 - 1.22) |      | 0.942   |
| NL0220A                       | -0.04 (-0.19 - 0.15)  |      | 0.683   | 0.18 (-0.58 - 0.99)  |      | 0.647   |
| NL0223A                       | 0.03 (-0.14 - 0.19)   |      | 0.727   | 0.68 (-0.64 - 1.99)  |      | 0.338   |
| NL0226A                       | -0.05 (-0.24 - 0.13)  |      | 0.605   | 0.15 (-1.22 - 1.56)  |      | 0.845   |
| NL0227A                       | -0.03 (-0.20 - 0.17)  |      | 0.741   | 0.10 (-0.54 - 0.95)  |      | 0.754   |
| NL0228A                       | 0.03 (-0.17 - 0.22)   |      | 0.765   | 0.57 (-0.33 - 1.49)  |      | 0.214   |
| NL0229A                       | 0.00 (-0.18 - 0.17)   |      | 0.989   | -0.04 (-1.22 - 1.22) |      | 0.942   |
| NL0231A                       | 0.02 (-0.17 - 0.20)   |      | 0.782   | 0.49 (-0.35 - 1.39)  |      | 0.242   |
| NL0232A                       | 0.00 (-0.16 - 0.16)   |      | 0.960   | 0.43 (-0.69 - 1.75)  |      | 0.441   |
| NL0250A                       | -0.04 (-0.22 - 0.15)  |      | 0.720   | 0.24 (-0.49 - 1.05)  |      | 0.528   |
| NO01                          | -0.05 (-0.15 - 0.05)  |      | 0.449   | -0.05 (-0.31 - 0.24) |      | 0.720   |
| PL03                          | 0.19 ( 0.07 - 0.30)   | **   | 0.001   | 1.08 ( 0.59 - 1.62)  | ***  | <0.001  |
| PT0004R                       | -0.14 (-0.32 - 0.06)  | +    | 0.100   | -0.32 (-0.72 - 0.22) |      | 0.143   |
| PUY                           | -0.07 (-0.16 - 0.06)  |      | 0.318   | -0.15 (-0.45 - 0.18) |      | 0.401   |
| SI0008R                       | -0.08 (-0.23 - 0.06)  |      | 0.231   | -0.23 (-0.68 - 0.23) |      | 0.325   |
| ZUG                           | 0.02 (-0.11 - 0.13)   |      | 0.779   | 0.05 (-0.33 - 0.38)  |      | 0.754   |
| European average <sup>†</sup> | 0.05 ± 0.01 ppbv/yr   |      |         | 0.41 ± 0.05 %/yr     |      |         |
| Range <sup>◊</sup>            | -0.14 to 0.32 ppbv/yr |      |         | -4.11 to 6.05 %/yr   |      |         |



Table B2: Quantification of annual CHIMERE model trends (ppbv/yr and %/yr) in O<sub>3</sub> 5<sup>th</sup> percentiles 1996-2005. 95% confidence interval given in brackets. Sig. = significance \*\*\* significant at 99.9% level, \*\* significant at 99.0% level, \* significant at 95.0% level, + significant at 90.0% level. † 2σ error. ◊ significant trends only

| ID      | Trend (ppbv/yr)      | Sig. | P-value | Trend (%/yr)         | Sig. | P-value |
|---------|----------------------|------|---------|----------------------|------|---------|
| AT0002R | 0.17 ( 0.04 - 0.29)  | **   | 0.007   | 1.05 (-0.15 - 2.18)  | +    | 0.058   |
| AT0004R | 0.10 (-0.04 - 0.22)  |      | 0.125   | 0.53 (-0.22 - 1.15)  |      | 0.129   |
| AT0005R | 0.13 ( 0.00 - 0.27)  | *    | 0.048   | 0.59 (-0.04 - 1.21)  | +    | 0.068   |
| AT0034R | 0.07 (-0.05 - 0.20)  |      | 0.268   | 0.48 (-0.07 - 1.10)  | +    | 0.093   |
| AT0044A | 0.13 ( 0.01 - 0.26)  | *    | 0.032   | 1.23 ( 0.29 - 2.26)  | *    | 0.013   |
| AT0052A | -0.03 (-0.11 - 0.08) |      | 0.568   | -0.11 (-0.56 - 0.44) |      | 0.693   |
| AT0054A | 0.11 (-0.04 - 0.25)  |      | 0.102   | 0.95 (-0.04 - 2.15)  | *    | 0.033   |
| AT0058A | 0.11 (-0.03 - 0.24)  |      | 0.125   | 0.48 (-0.03 - 1.03)  | +    | 0.065   |
| AT0064A | 0.07 (-0.06 - 0.18)  |      | 0.314   | 0.20 (-0.30 - 0.82)  |      | 0.454   |
| AT0069A | 0.14 ( 0.02 - 0.26)  | *    | 0.018   | 1.05 ( 0.10 - 2.04)  | *    | 0.024   |
| AT0073A | 0.11 (-0.04 - 0.23)  | +    | 0.082   | 0.87 (-0.10 - 1.82)  | +    | 0.058   |
| AT0079A | 0.07 (-0.05 - 0.20)  |      | 0.268   | 0.48 (-0.07 - 1.10)  | +    | 0.093   |
| AT0080A | 0.03 (-0.09 - 0.15)  |      | 0.534   | 0.45 (-0.39 - 1.21)  |      | 0.226   |
| AT0086A | 0.07 (-0.04 - 0.17)  |      | 0.156   | 0.66 ( 0.01 - 1.21)  | *    | 0.028   |
| AT0089A | 0.10 (-0.03 - 0.22)  |      | 0.169   | 0.23 (-0.32 - 0.84)  |      | 0.465   |
| AT0094A | -0.03 (-0.11 - 0.08) |      | 0.568   | -0.11 (-0.56 - 0.44) |      | 0.693   |
| AT0095A | 0.13 ( 0.00 - 0.26)  | +    | 0.057   | 1.51 ( 0.32 - 2.96)  | *    | 0.017   |
| AT0096A | 0.03 (-0.11 - 0.16)  |      | 0.624   | 0.22 (-0.62 - 1.29)  |      | 0.596   |
| AT0101A | 0.29 ( 0.14 - 0.41)  | ***  | <0.001  | 1.70 ( 0.90 - 2.58)  | ***  | <0.001  |
| AT0102A | 0.13 ( 0.00 - 0.26)  | +    | 0.057   | 1.51 ( 0.32 - 2.96)  | *    | 0.017   |
| AT0103A | 0.13 ( 0.00 - 0.23)  | *    | 0.032   | 1.01 (-0.10 - 1.98)  | +    | 0.060   |
| AT0105A | 0.14 ( 0.01 - 0.27)  | *    | 0.023   | 1.08 ( 0.15 - 2.01)  | *    | 0.015   |
| AT0108A | 0.04 (-0.06 - 0.15)  |      | 0.417   | 0.33 (-0.33 - 1.12)  |      | 0.352   |
| AT0111A | 0.14 ( 0.01 - 0.27)  | *    | 0.023   | 1.08 ( 0.15 - 2.01)  | *    | 0.015   |
| AT0115A | 0.07 (-0.05 - 0.21)  |      | 0.255   | 0.18 (-0.37 - 0.68)  |      | 0.514   |
| AT0121A | 0.08 (-0.04 - 0.20)  |      | 0.196   | 0.19 (-0.37 - 0.75)  |      | 0.546   |
| AT0122A | 0.17 ( 0.04 - 0.29)  | *    | 0.011   | 0.66 ( 0.06 - 1.32)  | *    | 0.031   |
| AT0124A | -0.01 (-0.12 - 0.10) |      | 0.892   | -0.05 (-0.56 - 0.42) |      | 0.817   |
| AT0128A | 0.05 (-0.05 - 0.13)  |      | 0.288   | 0.40 (-0.12 - 0.90)  |      | 0.150   |
| AT0134A | 0.06 (-0.07 - 0.18)  |      | 0.286   | 0.47 (-0.26 - 1.22)  |      | 0.198   |
| AT0141A | 0.07 (-0.05 - 0.20)  |      | 0.268   | 0.48 (-0.07 - 1.10)  | +    | 0.093   |
| AT0143A | 0.05 (-0.05 - 0.13)  |      | 0.288   | 0.40 (-0.12 - 0.90)  |      | 0.150   |
| AT0146A | 0.04 (-0.07 - 0.17)  |      | 0.508   | 0.21 (-0.34 - 0.85)  |      | 0.511   |
| AT0149A | 0.13 ( 0.01 - 0.26)  | *    | 0.032   | 1.23 ( 0.29 - 2.26)  | *    | 0.013   |
| AT0153A | 0.12 (-0.02 - 0.22)  | *    | 0.043   | 0.93 ( 0.07 - 1.77)  | *    | 0.030   |
| AT0154A | 0.10 (-0.01 - 0.21)  | +    | 0.094   | 0.64 (-0.11 - 1.53)  | +    | 0.098   |
| AT0162A | 0.07 (-0.05 - 0.21)  |      | 0.255   | 0.18 (-0.37 - 0.68)  |      | 0.514   |
| AT0164A | 0.04 (-0.06 - 0.15)  |      | 0.417   | 0.33 (-0.33 - 1.12)  |      | 0.352   |
| AT0166A | 0.10 (-0.04 - 0.22)  |      | 0.125   | 0.53 (-0.22 - 1.15)  |      | 0.129   |
| AT0167A | 0.04 (-0.06 - 0.15)  |      | 0.417   | 0.33 (-0.33 - 1.12)  |      | 0.352   |
| AT0175A | 0.07 (-0.05 - 0.18)  |      | 0.236   | 0.52 (-0.44 - 1.44)  |      | 0.222   |
| AT0176A | 0.03 (-0.09 - 0.15)  |      | 0.534   | 0.45 (-0.39 - 1.21)  |      | 0.226   |

Table B2: continued. Quantification of annual CHIMERE model trends (ppbv/yr and %/yr) in O<sub>3</sub> 5<sup>th</sup> percentiles 1996-2005. 95% confidence interval given in brackets. Sig. = significance \*\*\* significant at 99.9% level, \*\* significant at 99.0% level, \* significant at 95.0% level, + significant at 90.0% level. ‡ 2σ error. ◊ significant trends only

| ID      | Trend (ppbv/yr)      | Sig. | P-value | Trend (%/yr)         | Sig. | P-value |
|---------|----------------------|------|---------|----------------------|------|---------|
| AT0180A | 0.07 (-0.05 - 0.18)  |      | 0.295   | 0.39 (-0.22 - 1.02)  |      | 0.209   |
| BE0032R | 0.09 (-0.09 - 0.24)  |      | 0.329   | 0.49 (-1.00 - 2.08)  |      | 0.534   |
| BE0033R | 0.06 (-0.14 - 0.25)  |      | 0.522   | 0.31 (-1.63 - 2.89)  |      | 0.727   |
| BE0035R | 0.14 (-0.01 - 0.30)  | +    | 0.059   | 1.31 (-0.45 - 3.54)  |      | 0.148   |
| BE0211A | 0.07 (-0.02 - 0.19)  |      | 0.150   | 2.12 (-1.08 - 7.09)  |      | 0.196   |
| BE0238A | 0.09 (-0.10 - 0.26)  |      | 0.251   | 0.61 (-0.43 - 1.62)  |      | 0.194   |
| BE0294A | 0.14 (-0.01 - 0.30)  | +    | 0.059   | 1.31 (-0.45 - 3.54)  |      | 0.148   |
| BE0298A | 0.06 (-0.01 - 0.17)  |      | 0.147   | 1.65 (-2.73 - 6.41)  |      | 0.371   |
| BE0302A | 0.14 (-0.01 - 0.28)  | +    | 0.064   | 1.03 ( 0.08 - 2.20)  | *    | 0.028   |
| BE0304A | 0.12 (-0.07 - 0.29)  |      | 0.158   | 0.96 (-0.29 - 2.42)  |      | 0.145   |
| BE0311A | 0.10 (-0.06 - 0.27)  |      | 0.190   | 0.83 (-0.14 - 1.81)  |      | 0.106   |
| BE0345A | 0.06 (-0.01 - 0.17)  |      | 0.147   | 1.65 (-2.73 - 6.41)  |      | 0.371   |
| CH0001R | 0.03 (-0.13 - 0.19)  |      | 0.734   | 0.02 (-0.59 - 0.72)  |      | 0.921   |
| CH0002R | 0.03 (-0.11 - 0.15)  |      | 0.723   | 0.10 (-0.62 - 0.85)  |      | 0.751   |
| CH0003R | 0.13 ( 0.00 - 0.24)  | *    | 0.039   | 0.87 ( 0.04 - 1.80)  | *    | 0.029   |
| CH0004R | 0.03 (-0.11 - 0.15)  |      | 0.723   | 0.10 (-0.62 - 0.85)  |      | 0.751   |
| CH0005R | 0.18 ( 0.05 - 0.30)  | **   | 0.005   | 0.96 ( 0.31 - 1.72)  | **   | 0.003   |
| CH0019A | 0.10 (-0.02 - 0.21)  | +    | 0.081   | 0.60 (-0.10 - 1.25)  | +    | 0.083   |
| CH0024A | -0.09 (-0.20 - 0.05) |      | 0.198   | -0.27 (-0.76 - 0.32) |      | 0.293   |
| CH0033A | 0.24 ( 0.11 - 0.36)  | ***  | <0.001  | 2.43 ( 0.99 - 4.71)  | ***  | <0.001  |
| CMN     | 0.11 (-0.05 - 0.30)  |      | 0.165   | 0.56 (-0.24 - 1.46)  |      | 0.142   |
| CZ0001R | 0.37 ( 0.19 - 0.53)  | ***  | <0.001  | 2.53 ( 1.26 - 3.70)  | ***  | <0.001  |
| CZ0003R | 0.36 ( 0.24 - 0.48)  | ***  | <0.001  | 2.35 ( 1.50 - 3.17)  | ***  | <0.001  |
| CZ0017A | 0.27 ( 0.16 - 0.39)  | ***  | <0.001  | 1.83 ( 1.15 - 2.69)  | ***  | <0.001  |
| CZ0030A | 0.23 ( 0.08 - 0.37)  | **   | 0.003   | 2.04 ( 0.99 - 3.33)  | ***  | <0.001  |
| CZ0041A | 0.56 ( 0.40 - 0.72)  | ***  | <0.001  | 4.81 ( 3.38 - 6.47)  | ***  | <0.001  |
| CZ0045A | 0.31 ( 0.17 - 0.43)  | ***  | <0.001  | 1.97 ( 1.07 - 2.89)  | ***  | <0.001  |
| CZ0049A | 0.20 ( 0.07 - 0.32)  | **   | 0.002   | 1.27 ( 0.42 - 2.36)  | **   | 0.002   |
| CZ0051A | 0.35 ( 0.18 - 0.53)  | ***  | <0.001  | 2.72 ( 1.45 - 3.96)  | ***  | <0.001  |
| CZ0055A | 0.34 ( 0.21 - 0.46)  | ***  | <0.001  | 2.40 ( 1.49 - 3.30)  | ***  | <0.001  |
| CZ0057A | 0.11 (-0.04 - 0.23)  | +    | 0.082   | 0.87 (-0.10 - 1.82)  | +    | 0.058   |
| CZ0062A | 0.32 ( 0.15 - 0.46)  | ***  | <0.001  | 2.95 ( 1.92 - 4.09)  | ***  | <0.001  |
| DE0003R | 0.15 ( 0.03 - 0.27)  | *    | 0.016   | 1.71 ( 0.57 - 3.34)  | **   | 0.007   |
| DE0007R | 0.09 (-0.06 - 0.27)  |      | 0.253   | 0.92 (-0.58 - 2.47)  |      | 0.242   |
| DE0008R | 0.05 (-0.08 - 0.17)  |      | 0.496   | 0.32 (-0.48 - 1.34)  |      | 0.449   |
| DE0009R | 0.09 (-0.12 - 0.30)  |      | 0.460   | 0.63 (-0.59 - 1.63)  |      | 0.251   |
| DE0035R | 0.21 ( 0.04 - 0.36)  | **   | 0.010   | 1.79 ( 0.56 - 3.33)  | **   | 0.003   |
| DE0422A | 0.28 ( 0.15 - 0.44)  | ***  | <0.001  | 3.40 ( 1.01 - 6.66)  | **   | 0.006   |
| DE0510A | 0.10 (-0.05 - 0.26)  |      | 0.162   | 1.04 (-0.53 - 3.29)  |      | 0.172   |
| DE0514A | 0.14 ( 0.02 - 0.26)  | *    | 0.018   | 1.05 ( 0.10 - 2.04)  | *    | 0.024   |
| DE0556A | 0.32 ( 0.15 - 0.46)  | ***  | <0.001  | 2.95 ( 1.92 - 4.09)  | ***  | <0.001  |
| DE0649A | 0.18 ( 0.05 - 0.33)  | *    | 0.014   | 1.20 ( 0.28 - 2.36)  | *    | 0.016   |

Table B2: continued. Quantification of annual CHIMERE model trends (ppbv/yr and %/yr) in O<sub>3</sub> 5<sup>th</sup> percentiles 1996-2005. 95% confidence interval given in brackets. Sig. = significance \*\*\* significant at 99.9% level, \*\* significant at 99.0% level, \* significant at 95.0% level, + significant at 90.0% level. ‡ 2σ error. ◊ significant trends only

| ID      | Trend (ppbv/yr)      | Sig. | P-value | Trend (%/yr)         | Sig. | P-value |
|---------|----------------------|------|---------|----------------------|------|---------|
| DE0651A | 0.20 ( 0.08 - 0.34)  | **   | 0.008   | 1.77 ( 0.77 - 3.07)  | **   | 0.002   |
| DE0674A | 0.10 (-0.06 - 0.27)  |      | 0.184   | 0.97 (-0.39 - 2.73)  |      | 0.139   |
| DE0679A | 0.17 ( 0.04 - 0.29)  | *    | 0.013   | 1.20 ( 0.14 - 2.40)  | *    | 0.016   |
| DE0680A | 0.21 ( 0.06 - 0.36)  | **   | 0.008   | 1.93 ( 0.13 - 3.71)  | *    | 0.026   |
| DE0684A | 0.15 ( 0.03 - 0.27)  | *    | 0.016   | 1.71 ( 0.57 - 3.34)  | **   | 0.007   |
| DE0685A | 0.16 ( 0.01 - 0.34)  | +    | 0.061   | 1.46 (-0.13 - 3.36)  | +    | 0.075   |
| DE0686A | 0.12 (-0.02 - 0.27)  |      | 0.122   | 0.89 (-0.19 - 2.21)  |      | 0.108   |
| DE0687A | 0.10 (-0.06 - 0.27)  |      | 0.184   | 0.97 (-0.39 - 2.73)  |      | 0.139   |
| DE0688A | 0.25 ( 0.08 - 0.42)  | **   | 0.003   | 2.06 ( 0.63 - 3.82)  | **   | 0.005   |
| DE0699A | 0.15 ( 0.04 - 0.28)  | **   | 0.007   | 2.80 ( 1.06 - 5.16)  | **   | 0.001   |
| DE0719A | 0.20 ( 0.09 - 0.34)  | **   | 0.002   | 1.51 ( 0.43 - 2.94)  | **   | 0.006   |
| DE0732A | 0.22 ( 0.07 - 0.38)  | **   | 0.004   | 1.96 ( 0.49 - 3.60)  | **   | 0.008   |
| DE0735A | 0.25 ( 0.08 - 0.42)  | **   | 0.003   | 2.06 ( 0.63 - 3.82)  | **   | 0.005   |
| DE0737A | 0.21 ( 0.07 - 0.37)  | **   | 0.009   | 3.15 ( 1.02 - 6.06)  | **   | 0.004   |
| DE0738A | 0.09 (-0.05 - 0.21)  |      | 0.224   | 0.66 (-0.10 - 1.56)  |      | 0.130   |
| DE0739A | 0.19 ( 0.08 - 0.31)  | **   | 0.006   | 2.18 ( 0.64 - 4.45)  | **   | 0.008   |
| DE0754A | 0.15 ( 0.00 - 0.32)  | +    | 0.075   | 2.24 ( 0.51 - 4.45)  | *    | 0.016   |
| DE0844A | 0.14 (-0.06 - 0.28)  |      | 0.130   | 2.16 (-0.10 - 4.34)  | +    | 0.064   |
| DE0874A | 0.27 ( 0.13 - 0.43)  | ***  | <0.001  | 3.40 ( 1.00 - 6.71)  | **   | 0.006   |
| DE0907A | 0.28 ( 0.14 - 0.43)  | ***  | 0.001   | 2.88 ( 1.19 - 4.79)  | ***  | <0.001  |
| DE0960A | 0.07 (-0.08 - 0.25)  |      | 0.367   | 0.55 (-0.58 - 1.68)  |      | 0.348   |
| DE0996A | 0.18 ( 0.02 - 0.33)  | *    | 0.036   | 1.83 ( 0.32 - 3.23)  | *    | 0.013   |
| EE0011R | 0.17 ( 0.03 - 0.31)  | *    | 0.011   | 0.56 ( 0.07 - 1.05)  | *    | 0.029   |
| ES0007R | -0.04 (-0.16 - 0.10) |      | 0.485   | -0.19 (-0.65 - 0.33) |      | 0.409   |
| ES1222A | 0.10 (-0.13 - 0.32)  |      | 0.316   | 0.41 (-0.45 - 1.26)  |      | 0.336   |
| ES1400A | 0.11 (-0.01 - 0.20)  | +    | 0.059   | 0.42 (-0.07 - 0.80)  | +    | 0.077   |
| ES1435A | 0.07 (-0.04 - 0.18)  |      | 0.194   | 0.24 (-0.17 - 0.60)  |      | 0.242   |
| ES1437A | 0.03 (-0.11 - 0.15)  |      | 0.680   | 0.15 (-0.42 - 0.66)  |      | 0.531   |
| ES1441A | 0.03 (-0.11 - 0.15)  |      | 0.680   | 0.15 (-0.42 - 0.66)  |      | 0.531   |
| FR08    | 0.12 (-0.04 - 0.28)  |      | 0.171   | 0.67 (-0.45 - 2.09)  |      | 0.284   |
| GB0002R | 0.07 (-0.11 - 0.25)  |      | 0.451   | 0.19 (-0.74 - 1.04)  |      | 0.670   |
| GB0006R | 0.05 (-0.11 - 0.20)  |      | 0.568   | 0.10 (-0.40 - 0.64)  |      | 0.730   |
| GB0013R | 0.15 ( 0.00 - 0.37)  | +    | 0.067   | 0.80 ( 0.01 - 1.81)  | *    | 0.048   |
| GB0014R | 0.35 ( 0.16 - 0.56)  | **   | 0.002   | 2.04 ( 0.80 - 3.45)  | **   | 0.002   |
| GB0015R | -0.07 (-0.22 - 0.06) |      | 0.310   | -0.22 (-0.78 - 0.28) |      | 0.406   |
| GB0031R | 0.31 ( 0.11 - 0.54)  | **   | 0.003   | 1.68 ( 0.71 - 3.12)  | ***  | 0.001   |
| GB0033R | 0.18 ( 0.00 - 0.38)  | *    | 0.033   | 0.90 (-0.08 - 1.84)  | *    | 0.030   |
| GB0036R | 0.50 ( 0.29 - 0.74)  | ***  | <0.001  | 4.17 ( 1.93 - 7.07)  | ***  | <0.001  |
| GB0037R | 0.45 ( 0.24 - 0.65)  | ***  | <0.001  | 5.57 ( 1.71 - 10.35) | **   | 0.003   |
| GB0038R | 0.46 ( 0.27 - 0.69)  | ***  | <0.001  | 4.20 ( 1.38 - 7.79)  | **   | 0.010   |
| GB0039R | 0.08 (-0.14 - 0.32)  |      | 0.568   | 0.20 (-1.21 - 1.80)  |      | 0.814   |
| GB0044R | 0.30 (-0.01 - 0.59)  | *    | 0.046   | 1.69 ( 0.07 - 3.68)  | *    | 0.036   |

Table B2: continued. Quantification of annual CHIMERE model trends (ppbv/yr and %/yr) in O<sub>3</sub> 5<sup>th</sup> percentiles 1996-2005. 95% confidence interval given in brackets. Sig. = significance \*\*\* significant at 99.9% level, \*\* significant at 99.0% level, \* significant at 95.0% level, + significant at 90.0% level. † 2σ error. ◊ significant trends only

| ID                            | Trend (ppbv/yr)       | Sig. | P-value | Trend (%/yr)         | Sig. | P-value |
|-------------------------------|-----------------------|------|---------|----------------------|------|---------|
| GB0045R                       | 0.38 ( 0.17 - 0.62)   | ***  | 0.001   | 4.32 ( 1.28 - 8.63)  | **   | 0.003   |
| GB0617A                       | 0.33 ( 0.18 - 0.51)   | ***  | <0.001  | 5.77 ( 2.30 - 10.38) | **   | 0.001   |
| HPB                           | 0.20 ( 0.06 - 0.33)   | **   | 0.004   | 1.75 ( 0.62 - 3.18)  | **   | 0.002   |
| HU0002R                       | -0.09 (-0.21 - 0.02)  | +    | 0.070   | -0.47 (-1.42 - 0.46) |      | 0.204   |
| IE31                          | 0.02 (-0.09 - 0.15)   |      | 0.690   | 0.11 (-0.31 - 0.51)  |      | 0.583   |
| IT04                          | 0.11 (-0.03 - 0.26)   |      | 0.143   | 0.98 (-0.01 - 2.24)  | +    | 0.050   |
| LT0015R                       | 0.13 (-0.05 - 0.31)   |      | 0.160   | 0.66 (-0.13 - 1.42)  | +    | 0.086   |
| LV0010R                       | 0.15 (-0.05 - 0.33)   |      | 0.105   | 0.71 (-0.20 - 1.52)  | +    | 0.087   |
| NL0007R                       | 0.13 ( 0.02 - 0.26)   | *    | 0.019   | 1.64 (-1.08 - 6.23)  |      | 0.217   |
| NL0009R                       | 0.19 (-0.08 - 0.42)   |      | 0.152   | 1.33 (-0.12 - 3.07)  | +    | 0.092   |
| NL0010R                       | 0.09 ( 0.00 - 0.20)   | +    | 0.056   | 2.50 (-1.39 - 8.10)  |      | 0.153   |
| NL0196A                       | 0.06 (-0.04 - 0.18)   |      | 0.236   | 1.23 (-2.12 - 5.62)  |      | 0.462   |
| NL0198A                       | 0.14 (-0.01 - 0.32)   |      | 0.108   | 0.98 (-1.78 - 4.22)  |      | 0.381   |
| NL0202A                       | 0.09 (-0.02 - 0.21)   | +    | 0.067   | 1.90 (-0.72 - 5.47)  |      | 0.150   |
| NL0205A                       | 0.16 ( 0.00 - 0.33)   | *    | 0.044   | 1.74 (-0.54 - 4.72)  |      | 0.132   |
| NL0207A                       | 0.07 (-0.16 - 0.31)   |      | 0.534   | 1.00 (-0.50 - 2.90)  |      | 0.207   |
| NL0209A                       | 0.05 (-0.03 - 0.15)   |      | 0.202   | 1.70 (-3.87 - 6.42)  |      | 0.482   |
| NL0220A                       | 0.06 (-0.14 - 0.25)   |      | 0.522   | 0.31 (-1.63 - 2.89)  |      | 0.727   |
| NL0223A                       | 0.06 (-0.03 - 0.19)   |      | 0.162   | 1.73 (-2.84 - 7.38)  |      | 0.422   |
| NL0226A                       | 0.01 (-0.09 - 0.13)   |      | 0.650   | 1.36 (-3.92 - 6.76)  |      | 0.574   |
| NL0227A                       | 0.01 (-0.23 - 0.29)   |      | 0.939   | 0.71 (-0.80 - 2.62)  |      | 0.374   |
| NL0228A                       | 0.10 (-0.09 - 0.31)   |      | 0.246   | 0.98 (-0.96 - 3.75)  |      | 0.320   |
| NL0229A                       | 0.05 (-0.03 - 0.15)   |      | 0.202   | 1.70 (-3.87 - 6.42)  |      | 0.482   |
| NL0231A                       | 0.14 (-0.02 - 0.32)   | +    | 0.078   | 1.71 (-0.36 - 4.39)  |      | 0.123   |
| NL0232A                       | 0.06 (-0.02 - 0.16)   |      | 0.165   | 1.04 (-3.57 - 5.72)  |      | 0.580   |
| NL0250A                       | -0.05 (-0.27 - 0.17)  |      | 0.690   | -1.16 (-3.37 - 1.22) |      | 0.293   |
| NO01                          | 0.11 (-0.06 - 0.32)   |      | 0.251   | 0.37 (-0.26 - 1.19)  |      | 0.282   |
| PL03                          | 0.33 ( 0.17 - 0.46)   | ***  | <0.001  | 2.66 ( 1.61 - 3.82)  | ***  | <0.001  |
| PT0004R                       | -0.13 (-0.29 - 0.04)  |      | 0.118   | -0.37 (-0.90 - 0.17) |      | 0.140   |
| PUY                           | 0.11 (-0.03 - 0.22)   |      | 0.117   | 0.42 (-0.15 - 0.96)  |      | 0.136   |
| SI0008R                       | -0.08 (-0.21 - 0.06)  |      | 0.206   | -0.27 (-0.93 - 0.35) |      | 0.303   |
| ZUG                           | 0.10 (-0.03 - 0.22)   |      | 0.169   | 0.23 (-0.32 - 0.84)  |      | 0.465   |
| European average <sup>†</sup> | 0.14 ± 0.01 ppbv/yr   |      |         | 1.19 ± 0.15 %/yr     |      |         |
| Range <sup>◊</sup>            | -0.09 to 0.56 ppbv/yr |      |         | -6.32 to 20.02 %/yr  |      |         |

Table B3: Quantification of annual CHIMERE model trends (ppbv/yr and %/yr) in O<sub>3</sub> 95<sup>th</sup> percentiles 1996-2005. 95% confidence interval given in brackets. Sig. = significance \*\*\* significant at 99.9% level, \*\* significant at 99.0% level, \* significant at 95.0% level, + significant at 90.0% level. † 2σ error. ◊ significant trends only

| ID      | Trend (ppbv/yr)      | Sig. | P-value | Trend (%/yr)         | Sig. | P-value |
|---------|----------------------|------|---------|----------------------|------|---------|
| AT0002R | -0.06 (-0.25 - 0.17) |      | 0.574   | -0.13 (-0.57 - 0.32) |      | 0.558   |
| AT0004R | -0.05 (-0.24 - 0.13) |      | 0.583   | -0.06 (-0.44 - 0.27) |      | 0.758   |
| AT0005R | -0.14 (-0.35 - 0.11) |      | 0.209   | -0.17 (-0.60 - 0.30) |      | 0.396   |
| AT0034R | -0.10 (-0.27 - 0.07) |      | 0.261   | -0.18 (-0.52 - 0.18) |      | 0.282   |
| AT0044A | -0.02 (-0.24 - 0.22) |      | 0.867   | -0.04 (-0.49 - 0.45) |      | 0.856   |
| AT0052A | -0.02 (-0.21 - 0.18) |      | 0.772   | -0.01 (-0.45 - 0.39) |      | 0.967   |
| AT0054A | 0.01 (-0.18 - 0.20)  |      | 0.942   | 0.06 (-0.30 - 0.52)  |      | 0.775   |
| AT0058A | -0.15 (-0.33 - 0.00) | *    | 0.049   | -0.25 (-0.58 - 0.07) |      | 0.120   |
| AT0064A | -0.15 (-0.32 - 0.05) |      | 0.113   | -0.24 (-0.61 - 0.18) |      | 0.209   |
| AT0069A | -0.01 (-0.23 - 0.21) |      | 0.921   | 0.03 (-0.45 - 0.52)  |      | 0.877   |
| AT0073A | -0.04 (-0.20 - 0.13) |      | 0.615   | -0.06 (-0.40 - 0.34) |      | 0.775   |
| AT0079A | -0.10 (-0.27 - 0.07) |      | 0.261   | -0.18 (-0.52 - 0.18) |      | 0.282   |
| AT0080A | 0.01 (-0.20 - 0.24)  |      | 0.935   | 0.04 (-0.38 - 0.52)  |      | 0.828   |
| AT0086A | -0.04 (-0.26 - 0.18) |      | 0.683   | -0.02 (-0.46 - 0.49) |      | 0.939   |
| AT0089A | -0.16 (-0.33 - 0.03) | +    | 0.068   | -0.24 (-0.59 - 0.16) |      | 0.199   |
| AT0094A | -0.02 (-0.21 - 0.18) |      | 0.772   | -0.01 (-0.45 - 0.39) |      | 0.967   |
| AT0095A | -0.04 (-0.27 - 0.17) |      | 0.666   | -0.10 (-0.56 - 0.37) |      | 0.676   |
| AT0096A | -0.05 (-0.27 - 0.20) |      | 0.673   | -0.01 (-0.52 - 0.45) |      | 0.978   |
| AT0101A | -0.03 (-0.22 - 0.17) |      | 0.737   | -0.07 (-0.45 - 0.35) |      | 0.741   |
| AT0102A | -0.04 (-0.27 - 0.17) |      | 0.666   | -0.10 (-0.56 - 0.37) |      | 0.676   |
| AT0103A | -0.04 (-0.26 - 0.15) |      | 0.686   | -0.08 (-0.52 - 0.35) |      | 0.803   |
| AT0105A | -0.05 (-0.28 - 0.19) |      | 0.676   | -0.04 (-0.51 - 0.44) |      | 0.831   |
| AT0108A | -0.01 (-0.21 - 0.20) |      | 0.949   | 0.00 (-0.41 - 0.45)  |      | 0.989   |
| AT0111A | -0.05 (-0.28 - 0.19) |      | 0.676   | -0.04 (-0.51 - 0.44) |      | 0.831   |
| AT0115A | -0.04 (-0.20 - 0.15) |      | 0.700   | -0.03 (-0.39 - 0.35) |      | 0.852   |
| AT0121A | -0.18 (-0.36 - 0.01) | *    | 0.045   | -0.29 (-0.68 - 0.12) |      | 0.123   |
| AT0122A | -0.08 (-0.26 - 0.11) |      | 0.367   | -0.15 (-0.52 - 0.22) |      | 0.371   |
| AT0124A | -0.14 (-0.31 - 0.06) |      | 0.132   | -0.25 (-0.60 - 0.13) |      | 0.174   |
| AT0128A | -0.07 (-0.27 - 0.13) |      | 0.443   | -0.14 (-0.57 - 0.24) |      | 0.528   |
| AT0134A | -0.04 (-0.28 - 0.21) |      | 0.765   | -0.04 (-0.50 - 0.51) |      | 0.917   |
| AT0141A | -0.10 (-0.27 - 0.07) |      | 0.261   | -0.18 (-0.52 - 0.18) |      | 0.282   |
| AT0143A | -0.07 (-0.27 - 0.13) |      | 0.443   | -0.14 (-0.57 - 0.24) |      | 0.528   |
| AT0146A | -0.03 (-0.18 - 0.13) |      | 0.683   | -0.05 (-0.37 - 0.32) |      | 0.782   |
| AT0149A | -0.02 (-0.24 - 0.22) |      | 0.867   | -0.04 (-0.49 - 0.45) |      | 0.856   |
| AT0153A | -0.09 (-0.29 - 0.12) |      | 0.367   | -0.17 (-0.53 - 0.27) |      | 0.401   |
| AT0154A | -0.05 (-0.24 - 0.14) |      | 0.640   | -0.07 (-0.48 - 0.36) |      | 0.761   |
| AT0162A | -0.04 (-0.20 - 0.15) |      | 0.700   | -0.03 (-0.39 - 0.35) |      | 0.852   |
| AT0164A | -0.01 (-0.21 - 0.20) |      | 0.949   | 0.00 (-0.41 - 0.45)  |      | 0.989   |
| AT0166A | -0.05 (-0.24 - 0.13) |      | 0.583   | -0.06 (-0.44 - 0.27) |      | 0.758   |
| AT0167A | -0.01 (-0.21 - 0.20) |      | 0.949   | 0.00 (-0.41 - 0.45)  |      | 0.989   |
| AT0175A | -0.08 (-0.30 - 0.17) |      | 0.522   | -0.19 (-0.64 - 0.30) |      | 0.449   |
| AT0176A | 0.01 (-0.20 - 0.24)  |      | 0.935   | 0.04 (-0.38 - 0.52)  |      | 0.828   |

Table B3: Quantification of annual CHIMERE model trends (ppbv/yr and %/yr) in O<sub>3</sub> 95<sup>th</sup> percentiles 1996-2005. 95% confidence interval given in brackets. Sig. = significance \*\*\* significant at 99.9% level, \*\* significant at 99.0% level, \* significant at 95.0% level, + significant at 90.0% level. † 2σ error. ◊ significant trends only

| ID      | Trend (ppbv/yr)       | Sig. | P-value | Trend (%/yr)          | Sig. | P-value |
|---------|-----------------------|------|---------|-----------------------|------|---------|
| AT0180A | -0.02 (-0.21 - 0.15)  |      | 0.799   | -0.06 (-0.42 - 0.30)  |      | 0.727   |
| BE0032R | 0.03 (-0.16 - 0.28)   |      | 0.785   | 0.07 (-0.37 - 0.58)   |      | 0.772   |
| BE0033R | -0.03 (-0.20 - 0.12)  |      | 0.586   | -0.08 (-0.44 - 0.29)  |      | 0.602   |
| BE0035R | 0.05 (-0.12 - 0.26)   |      | 0.627   | 0.11 (-0.27 - 0.60)   |      | 0.596   |
| BE0211A | 0.03 (-0.17 - 0.24)   |      | 0.720   | 0.14 (-0.32 - 0.66)   |      | 0.543   |
| BE0238A | 0.03 (-0.14 - 0.21)   |      | 0.710   | 0.06 (-0.31 - 0.44)   |      | 0.730   |
| BE0294A | 0.05 (-0.12 - 0.26)   |      | 0.627   | 0.11 (-0.27 - 0.60)   |      | 0.596   |
| BE0298A | 0.10 (-0.12 - 0.32)   |      | 0.371   | 0.18 (-0.37 - 0.76)   |      | 0.537   |
| BE0302A | 0.00 (-0.19 - 0.25)   |      | 0.971   | 0.02 (-0.42 - 0.51)   |      | 0.942   |
| BE0304A | 0.06 (-0.09 - 0.22)   |      | 0.449   | 0.15 (-0.21 - 0.56)   |      | 0.488   |
| BE0311A | 0.04 (-0.16 - 0.23)   |      | 0.663   | 0.10 (-0.36 - 0.50)   |      | 0.624   |
| BE0345A | 0.10 (-0.12 - 0.32)   |      | 0.371   | 0.18 (-0.37 - 0.76)   |      | 0.537   |
| CH0001R | -0.07 (-0.29 - 0.17)  |      | 0.534   | -0.13 (-0.51 - 0.32)  |      | 0.499   |
| CH0002R | 0.01 (-0.23 - 0.29)   |      | 0.953   | -0.03 (-0.46 - 0.50)  |      | 0.903   |
| CH0003R | -0.22 (-0.45 - 0.06)  | +    | 0.091   | -0.38 (-0.84 - 0.23)  |      | 0.188   |
| CH0004R | 0.01 (-0.23 - 0.29)   |      | 0.953   | -0.03 (-0.46 - 0.50)  |      | 0.903   |
| CH0005R | -0.15 (-0.36 - 0.13)  |      | 0.233   | -0.20 (-0.61 - 0.30)  |      | 0.357   |
| CH0019A | -0.24 (-0.45 - 0.02)  | +    | 0.060   | -0.35 (-0.79 - 0.13)  |      | 0.122   |
| CH0024A | -0.06 (-0.24 - 0.13)  |      | 0.468   | -0.12 (-0.44 - 0.24)  |      | 0.508   |
| CH0033A | -0.29 (-0.61 - 0.06)  | +    | 0.064   | -0.33 (-0.86 - 0.26)  |      | 0.222   |
| CMN     | -0.46 (-0.72 - -0.23) | ***  | <0.001  | -0.73 (-1.13 - -0.30) | **   | 0.002   |
| CZ0001R | -0.03 (-0.25 - 0.18)  |      | 0.792   | -0.10 (-0.57 - 0.38)  |      | 0.737   |
| CZ0003R | -0.05 (-0.24 - 0.18)  |      | 0.640   | -0.12 (-0.58 - 0.38)  |      | 0.586   |
| CZ0017A | -0.03 (-0.24 - 0.17)  |      | 0.785   | -0.17 (-0.65 - 0.31)  |      | 0.514   |
| CZ0030A | -0.02 (-0.24 - 0.17)  |      | 0.838   | -0.08 (-0.53 - 0.35)  |      | 0.707   |
| CZ0041A | -0.06 (-0.29 - 0.17)  |      | 0.596   | -0.18 (-0.68 - 0.35)  |      | 0.474   |
| CZ0045A | -0.02 (-0.24 - 0.21)  |      | 0.852   | -0.02 (-0.47 - 0.42)  |      | 0.917   |
| CZ0049A | -0.05 (-0.24 - 0.16)  |      | 0.634   | -0.06 (-0.44 - 0.41)  |      | 0.782   |
| CZ0051A | -0.03 (-0.25 - 0.17)  |      | 0.696   | -0.09 (-0.57 - 0.35)  |      | 0.680   |
| CZ0055A | -0.08 (-0.28 - 0.12)  |      | 0.465   | -0.15 (-0.62 - 0.30)  |      | 0.496   |
| CZ0057A | -0.04 (-0.20 - 0.13)  |      | 0.615   | -0.06 (-0.40 - 0.34)  |      | 0.775   |
| CZ0062A | 0.03 (-0.20 - 0.28)   |      | 0.789   | 0.04 (-0.48 - 0.57)   |      | 0.856   |
| DE0003R | 0.03 (-0.24 - 0.35)   |      | 0.775   | -0.06 (-0.59 - 0.47)  |      | 0.772   |
| DE0007R | -0.03 (-0.24 - 0.17)  |      | 0.789   | -0.09 (-0.55 - 0.39)  |      | 0.734   |
| DE0008R | 0.02 (-0.21 - 0.25)   |      | 0.881   | -0.05 (-0.57 - 0.51)  |      | 0.845   |
| DE0009R | -0.09 (-0.26 - 0.04)  |      | 0.219   | -0.17 (-0.51 - 0.13)  |      | 0.338   |
| DE0035R | -0.03 (-0.24 - 0.17)  |      | 0.754   | -0.10 (-0.60 - 0.39)  |      | 0.683   |
| DE0422A | 0.12 (-0.13 - 0.39)   |      | 0.381   | 0.18 (-0.36 - 0.76)   |      | 0.479   |
| DE0510A | -0.06 (-0.30 - 0.18)  |      | 0.657   | -0.09 (-0.57 - 0.45)  |      | 0.690   |
| DE0514A | -0.01 (-0.23 - 0.21)  |      | 0.921   | 0.03 (-0.45 - 0.52)   |      | 0.877   |
| DE0556A | 0.03 (-0.20 - 0.28)   |      | 0.789   | 0.04 (-0.48 - 0.57)   |      | 0.856   |
| DE0649A | 0.12 (-0.12 - 0.34)   |      | 0.293   | 0.15 (-0.35 - 0.70)   |      | 0.540   |

Table B3: Quantification of annual CHIMERE model trends (ppbv/yr and %/yr) in O<sub>3</sub> 95<sup>th</sup> percentiles 1996-2005. 95% confidence interval given in brackets. Sig. = significance \*\*\* significant at 99.9% level, \*\* significant at 99.0% level, \* significant at 95.0% level, + significant at 90.0% level. † 2σ error. ◊ significant trends only

| ID      | Trend (ppbv/yr)       | Sig. | P-value | Trend (%/yr)          | Sig. | P-value |
|---------|-----------------------|------|---------|-----------------------|------|---------|
| DE0651A | 0.11 (-0.12 - 0.32)   |      | 0.338   | 0.18 (-0.28 - 0.67)   |      | 0.485   |
| DE0674A | 0.05 (-0.15 - 0.31)   |      | 0.615   | 0.12 (-0.33 - 0.68)   |      | 0.650   |
| DE0679A | -0.02 (-0.21 - 0.19)  |      | 0.789   | -0.04 (-0.43 - 0.37)  |      | 0.877   |
| DE0680A | 0.11 (-0.08 - 0.34)   |      | 0.235   | 0.30 (-0.13 - 0.78)   |      | 0.190   |
| DE0684A | 0.03 (-0.24 - 0.35)   |      | 0.775   | -0.06 (-0.59 - 0.47)  |      | 0.772   |
| DE0685A | 0.09 (-0.16 - 0.37)   |      | 0.474   | 0.08 (-0.40 - 0.64)   |      | 0.779   |
| DE0686A | 0.05 (-0.17 - 0.31)   |      | 0.650   | 0.12 (-0.37 - 0.62)   |      | 0.720   |
| DE0687A | 0.05 (-0.15 - 0.31)   |      | 0.615   | 0.12 (-0.33 - 0.68)   |      | 0.650   |
| DE0688A | 0.12 (-0.08 - 0.36)   |      | 0.236   | 0.21 (-0.26 - 0.72)   |      | 0.379   |
| DE0699A | 0.02 (-0.26 - 0.25)   |      | 0.913   | -0.09 (-0.60 - 0.51)  |      | 0.653   |
| DE0719A | 0.02 (-0.20 - 0.25)   |      | 0.860   | -0.07 (-0.58 - 0.47)  |      | 0.789   |
| DE0732A | 0.13 (-0.08 - 0.34)   |      | 0.231   | 0.25 (-0.18 - 0.74)   |      | 0.295   |
| DE0735A | 0.12 (-0.08 - 0.36)   |      | 0.236   | 0.21 (-0.26 - 0.72)   |      | 0.379   |
| DE0737A | 0.11 (-0.17 - 0.37)   |      | 0.465   | 0.11 (-0.41 - 0.65)   |      | 0.713   |
| DE0738A | 0.02 (-0.19 - 0.26)   |      | 0.849   | -0.05 (-0.55 - 0.47)  |      | 0.845   |
| DE0739A | 0.02 (-0.24 - 0.26)   |      | 0.835   | -0.04 (-0.55 - 0.50)  |      | 0.852   |
| DE0754A | -0.01 (-0.26 - 0.23)  |      | 0.949   | -0.02 (-0.62 - 0.51)  |      | 0.928   |
| DE0844A | -0.16 (-0.33 - 0.02)  | +    | 0.095   | -0.31 (-0.73 - 0.24)  |      | 0.255   |
| DE0874A | 0.13 (-0.05 - 0.34)   |      | 0.165   | 0.31 (-0.14 - 0.80)   |      | 0.184   |
| DE0907A | 0.14 (-0.10 - 0.36)   |      | 0.222   | 0.19 (-0.32 - 0.75)   |      | 0.479   |
| DE0960A | -0.08 (-0.26 - 0.10)  |      | 0.350   | -0.17 (-0.65 - 0.34)  |      | 0.460   |
| DE0996A | 0.08 (-0.15 - 0.30)   |      | 0.490   | 0.17 (-0.31 - 0.67)   |      | 0.479   |
| EE0011R | -0.15 (-0.29 - 0.02)  | *    | 0.038   | -0.33 (-0.66 - 0.08)  | +    | 0.065   |
| ES0007R | 0.17 ( 0.00 - 0.34)   | +    | 0.062   | 0.27 (-0.01 - 0.55)   | +    | 0.067   |
| ES1222A | -0.16 (-0.38 - 0.05)  |      | 0.169   | -0.35 (-0.68 - 0.05)  |      | 0.102   |
| ES1400A | 0.09 (-0.08 - 0.25)   |      | 0.343   | 0.17 (-0.11 - 0.48)   |      | 0.257   |
| ES1435A | 0.02 (-0.11 - 0.15)   |      | 0.768   | 0.04 (-0.20 - 0.28)   |      | 0.761   |
| ES1437A | -0.01 (-0.13 - 0.13)  |      | 0.910   | -0.04 (-0.27 - 0.21)  |      | 0.775   |
| ES1441A | -0.01 (-0.13 - 0.13)  |      | 0.910   | -0.04 (-0.27 - 0.21)  |      | 0.775   |
| FR08    | 0.01 (-0.25 - 0.30)   |      | 0.913   | 0.00 (-0.51 - 0.56)   |      | 0.996   |
| GB0002R | -0.16 (-0.36 - 0.00)  | *    | 0.043   | -0.36 (-0.80 - 0.02)  | *    | 0.046   |
| GB0006R | -0.21 (-0.35 - -0.09) | ***  | 0.001   | -0.45 (-0.77 - -0.21) | ***  | 0.001   |
| GB0013R | -0.11 (-0.25 - 0.00)  | +    | 0.051   | -0.24 (-0.57 - 0.01)  | +    | 0.056   |
| GB0014R | -0.09 (-0.23 - 0.03)  |      | 0.154   | -0.32 (-0.63 - -0.04) | *    | 0.038   |
| GB0015R | -0.16 (-0.33 - -0.03) | *    | 0.017   | -0.38 (-0.80 - -0.04) | *    | 0.024   |
| GB0031R | -0.14 (-0.31 - 0.01)  | *    | 0.036   | -0.30 (-0.69 - 0.08)  | +    | 0.060   |
| GB0033R | -0.15 (-0.37 - 0.05)  |      | 0.119   | -0.27 (-0.73 - 0.12)  |      | 0.168   |
| GB0036R | 0.03 (-0.14 - 0.19)   |      | 0.693   | 0.08 (-0.29 - 0.51)   |      | 0.605   |
| GB0037R | -0.03 (-0.20 - 0.10)  |      | 0.713   | -0.08 (-0.48 - 0.24)  |      | 0.631   |
| GB0038R | 0.02 (-0.13 - 0.18)   |      | 0.828   | 0.04 (-0.28 - 0.39)   |      | 0.838   |
| GB0039R | -0.06 (-0.18 - 0.06)  |      | 0.352   | -0.11 (-0.42 - 0.13)  |      | 0.362   |
| GB0044R | -0.05 (-0.22 - 0.10)  |      | 0.471   | -0.14 (-0.52 - 0.22)  |      | 0.394   |

Table B3: Quantification of annual CHIMERE model trends (ppbv/yr and %/yr) in O<sub>3</sub> 95<sup>th</sup> percentiles 1996-2005. 95% confidence interval given in brackets. Sig. = significance \*\*\* significant at 99.9% level, \*\* significant at 99.0% level, \* significant at 95.0% level, + significant at 90.0% level. † 2σ error. ◊ significant trends only

| ID                            | Trend (ppbv/yr)       | Sig. | P-value | Trend (%/yr)          | Sig. | P-value |
|-------------------------------|-----------------------|------|---------|-----------------------|------|---------|
| GB0045R                       | 0.01 (-0.18 - 0.15)   |      | 0.935   | -0.02 (-0.44 - 0.32)  |      | 0.910   |
| GB0617A                       | 0.00 (-0.19 - 0.15)   |      | 0.975   | -0.02 (-0.46 - 0.38)  |      | 0.899   |
| HPB                           | -0.07 (-0.28 - 0.17)  |      | 0.537   | -0.12 (-0.57 - 0.37)  |      | 0.602   |
| HU0002R                       | -0.01 (-0.19 - 0.15)  |      | 0.885   | -0.05 (-0.45 - 0.33)  |      | 0.806   |
| IE31                          | -0.27 (-0.44 - -0.14) | ***  | <0.001  | -0.61 (-1.01 - -0.29) | ***  | <0.001  |
| IT04                          | -0.27 (-0.58 - 0.07)  | +    | 0.070   | -0.34 (-0.84 - 0.32)  |      | 0.191   |
| LT0015R                       | -0.13 (-0.28 - 0.00)  | +    | 0.054   | -0.30 (-0.62 - 0.03)  | +    | 0.070   |
| LV0010R                       | -0.14 (-0.28 - -0.01) | *    | 0.035   | -0.31 (-0.61 - -0.01) | *    | 0.035   |
| NL0007R                       | 0.13 (-0.09 - 0.34)   |      | 0.280   | 0.30 (-0.23 - 0.88)   |      | 0.303   |
| NL0009R                       | -0.12 (-0.29 - 0.03)  |      | 0.114   | -0.25 (-0.58 - 0.10)  |      | 0.139   |
| NL0010R                       | 0.07 (-0.14 - 0.32)   |      | 0.485   | 0.27 (-0.19 - 0.85)   |      | 0.221   |
| NL0196A                       | 0.10 (-0.13 - 0.36)   |      | 0.386   | 0.26 (-0.23 - 0.87)   |      | 0.305   |
| NL0198A                       | 0.01 (-0.17 - 0.22)   |      | 0.870   | 0.07 (-0.42 - 0.56)   |      | 0.754   |
| NL0202A                       | 0.07 (-0.14 - 0.31)   |      | 0.485   | 0.20 (-0.29 - 0.75)   |      | 0.443   |
| NL0205A                       | 0.05 (-0.15 - 0.28)   |      | 0.653   | 0.11 (-0.36 - 0.63)   |      | 0.663   |
| NL0207A                       | -0.03 (-0.15 - 0.09)  |      | 0.611   | -0.07 (-0.35 - 0.21)  |      | 0.680   |
| NL0209A                       | 0.03 (-0.21 - 0.26)   |      | 0.814   | 0.03 (-0.52 - 0.67)   |      | 0.899   |
| NL0220A                       | -0.03 (-0.20 - 0.12)  |      | 0.586   | -0.08 (-0.44 - 0.29)  |      | 0.602   |
| NL0223A                       | 0.10 (-0.16 - 0.36)   |      | 0.414   | 0.26 (-0.34 - 0.87)   |      | 0.364   |
| NL0226A                       | -0.04 (-0.24 - 0.17)  |      | 0.683   | -0.11 (-0.57 - 0.38)  |      | 0.653   |
| NL0227A                       | -0.09 (-0.24 - 0.04)  |      | 0.228   | -0.20 (-0.53 - 0.10)  |      | 0.233   |
| NL0228A                       | 0.05 (-0.15 - 0.24)   |      | 0.653   | 0.08 (-0.30 - 0.52)   |      | 0.686   |
| NL0229A                       | 0.03 (-0.21 - 0.26)   |      | 0.814   | 0.03 (-0.52 - 0.67)   |      | 0.899   |
| NL0231A                       | 0.07 (-0.13 - 0.29)   |      | 0.552   | 0.12 (-0.34 - 0.65)   |      | 0.624   |
| NL0232A                       | 0.07 (-0.18 - 0.32)   |      | 0.565   | 0.14 (-0.44 - 0.74)   |      | 0.589   |
| NL0250A                       | -0.07 (-0.22 - 0.09)  |      | 0.345   | -0.16 (-0.51 - 0.19)  |      | 0.404   |
| NO01                          | -0.20 (-0.36 - -0.05) | *    | 0.018   | -0.46 (-0.83 - -0.09) | *    | 0.023   |
| PL03                          | -0.08 (-0.29 - 0.14)  |      | 0.457   | -0.14 (-0.62 - 0.34)  |      | 0.540   |
| PT0004R                       | -0.13 (-0.37 - 0.12)  |      | 0.229   | -0.23 (-0.62 - 0.17)  |      | 0.246   |
| PUY                           | -0.03 (-0.25 - 0.16)  |      | 0.772   | -0.11 (-0.50 - 0.27)  |      | 0.624   |
| SI0008R                       | -0.13 (-0.33 - 0.07)  |      | 0.194   | -0.29 (-0.66 - 0.07)  |      | 0.126   |
| ZUG                           | -0.16 (-0.33 - 0.03)  | +    | 0.068   | -0.24 (-0.59 - 0.16)  |      | 0.199   |
| European average <sup>†</sup> | -0.03 ± 0.02 ppbv/yr  |      |         | -0.06 ± 0.04 %/yr     |      |         |
| Range <sup>◊</sup>            | -0.46 to 0.17 ppbv/yr |      |         | -3.12 to 2.16 %/yr    |      |         |



## 5 Sites Used in This Study

A list of the sites selected for inclusion in this study including their GEOmon re-categorisation based on a representiveness study.

Table C1: Background sites selected from the GEOmon harmonised data set including their categorisation as per Henne et al., 2010

| ID      | Station                                     | Longitude<br>(°) | Latitude<br>(°) | Altitude<br>(m a.s.l) | GEOmon<br>Category |
|---------|---------------------------------------------|------------------|-----------------|-----------------------|--------------------|
| AT0002R | Illmitz                                     | 16.77            | 47.77           | 117                   | rural              |
| AT0004R | St. Koloman Kleinhorn                       | 13.23            | 47.65           | 1005                  | rural              |
| AT0005R | Vorhegg bei Kötschach-Mauthen               | 12.97            | 46.68           | 1020                  | valley/basin       |
| AT0034R | Sonnblick                                   | 12.97            | 47.05           | 3106                  | elevated           |
| AT0044A | Streithofen                                 | 15.94            | 48.28           | 220                   | rural              |
| AT0052A | Piber                                       | 15.08            | 47.08           | 585                   | valley/basin       |
| AT0054A | Schöneben                                   | 13.95            | 48.71           | 920                   | elevated           |
| AT0058A | Zillertaler Alpen                           | 11.87            | 47.14           | 1970                  | elevated           |
| AT0064A | Innsbruck Nordkette                         | 11.38            | 47.31           | 1910                  | elevated           |
| AT0069A | Haunsberg                                   | 13.02            | 47.97           | 730                   | elevated           |
| AT0073A | Grünbach bei Freistadt                      | 14.57            | 48.53           | 918                   | elevated           |
| AT0079A | Sonnblick                                   | 12.96            | 47.05           | 3106                  | elevated           |
| AT0080A | St. Valentin Stein                          | 14.56            | 48.23           | 242                   | rural              |
| AT0086A | Kollmitzberg                                | 14.87            | 48.18           | 465                   | rural              |
| AT0089A | Karwendel West                              | 11.23            | 47.34           | 1730                  | elevated           |
| AT0094A | Hochgössnitz                                | 15.02            | 47.06           | 900                   | rural              |
| AT0095A | Mistelbach                                  | 16.58            | 48.58           | 250                   | rural              |
| AT0096A | Forsthof am Schöpfl                         | 15.92            | 48.11           | 581                   | rural/polluted     |
| AT0101A | Heidenreichstein Thaures                    | 15.05            | 48.88           | 560                   | rural              |
| AT0102A | Wolkersdorf                                 | 16.52            | 48.39           | 190                   | rural/polluted     |
| AT0103A | Stixneusiedl                                | 16.68            | 48.05           | 210                   | rural/polluted     |
| AT0105A | Irnfritz                                    | 15.5             | 48.72           | 556                   | rural              |
| AT0108A | Masenberg                                   | 15.88            | 47.35           | 1137                  | elevated           |
| AT0111A | Dunkelsteinerwald                           | 15.55            | 48.37           | 305                   | rural/agricultural |
| AT0115A | Grundlsee                                   | 13.8             | 47.62           | 980                   | rural              |
| AT0121A | Höfen Lächbichl                             | 10.68            | 47.47           | 880                   | valley/basin       |
| AT0122A | Kramsach Angerberg                          | 11.91            | 47.46           | 600                   | valley/basin       |
| AT0124A | Gerlitzten Steinturm                        | 13.90            | 46.68           | 1895                  | elevated           |
| AT0128A | St. Georgen im Lavanttal -<br>Herzogberg    | 14.89            | 46.71           | 540                   | rural              |
| AT0134A | Annaberg - Joachimsberg                     | 15.32            | 47.86           | 891                   | rural              |
| AT0141A | Obervellach Schulzentrum                    | 13.2             | 46.94           | 686                   | valley/basin       |
| AT0143A | Bleiburg Koschatstrasse                     | 14.8             | 46.59           | 480                   | rural              |
| AT0146A | Stolzalpe bei Murau                         | 14.2             | 47.13           | 1302                  | rural              |
| AT0149A | Pillersdorf bei Retz                        | 15.94            | 48.72           | 315                   | rural              |
| AT0153A | Arnfels - Remschnigg                        | 15.37            | 46.65           | 785                   | elevated           |
| AT0154A | Wiesmath                                    | 16.29            | 47.61           | 738                   | elevated           |
| AT0162A | Liezen                                      | 14.24            | 47.57           | 665                   | valley/basin       |
| AT0164A | Oberwart - Brunnenfeld                      | 16.19            | 47.3            | 330                   | rural              |
| AT0166A | Zell am See Krankenhaus                     | 12.81            | 47.34           | 770                   | valley/basin       |
| AT0167A | Payerbach                                   | 15.85            | 47.67           | 890                   | rural              |
| AT0175A | Klöch bei Bad Radkersburg                   | 15.96            | 46.75           | 300                   | rural              |
| AT0176A | Zöbelboden -<br>Reichraminger Hintergebirge | 14.44            | 47.84           | 899                   | elevated           |
| AT0180A | Hochwurzten                                 | 13.63            | 47.36           | 1850                  | elevated           |
| BE0032R | Eupen                                       | 6                | 50.63           | 295                   | rural/polluted     |

Table C1: continued. Background sites selected from the GEOmon harmonised data set including their categorisation as per Henne et al., 2010

| ID      | Station                    | Longitude<br>(°) | Latitude<br>(°) | Altitude<br>(m a.s.l) | GEOmon<br>Category |
|---------|----------------------------|------------------|-----------------|-----------------------|--------------------|
| BE0033R | Moerkerke                  | 3.36             | 51.26           | 3                     | rural/coastal      |
| BE0035R | Vezin                      | 4.99             | 50.5            | 160                   | rural/polluted     |
| BE0211A | Gellik                     | 5.62             | 50.88           | 70                    | suburban           |
| BE0238A | Offagne                    | 5.2              | 49.88           | 430                   | rural              |
| BE0294A | Walshoutem                 | 5.1              | 50.71           | 135                   | rural/polluted     |
| BE0298A | Idegem                     | 3.93             | 50.8            | 15                    | rural/polluted     |
| BE0302A | Habay-la-n                 | 5.63             | 49.72           | 375                   | rural              |
| BE0304A | Dourbes                    | 4.59             | 50.1            | 225                   | rural              |
| BE0311A | Saint-ode                  | 5.59             | 50.03           | 510                   | rural              |
| BE0345A | St.P.Leeuwg                | 4.23             | 50.77           | 20                    | suburban           |
| CH0001R | Jungfrauojoch              | 7.98             | 46.55           | 3573                  | elevated           |
| CH0002R | Payerne                    | 6.94             | 46.81           | 489                   | rural              |
| CH0003R | Tänikon                    | 8.9              | 47.48           | 539                   | rural/polluted     |
| CH0004R | Chaumont                   | 6.98             | 47.05           | 1137                  | elevated           |
| CH0005R | Rigi-Seebodenalp           | 8.46             | 47.07           | 1031                  | elevated           |
| CH0019A | St. Gallen Stuelegg        | 9.39             | 47.41           | 920                   | elevated           |
| CH0024A | Saxon                      | 7.15             | 46.14           | 460                   | valley/basin       |
| CH0033A | Magadino-Cadenazzo         | 8.93             | 46.16           | 204                   | valley/basin       |
| CMN     | Monte Cimone               | 10.68            | 44.17           | 2165                  | elevated           |
| CZ0001R | Svratouch                  | 16.04            | 49.74           | 735                   | elevated           |
| CZ0003R | Kosetice                   | 15.08            | 49.57           | 535                   | rural              |
| CZ0017A | Bily Kriz                  | 18.54            | 49.5            | 890                   | elevated           |
| CZ0030A | Sous                       | 15.32            | 50.79           | 771                   | elevated           |
| CZ0041A | Ondrejov                   | 14.78            | 49.92           | 514                   | rural/polluted     |
| CZ0045A | Kostelni Myslova           | 15.44            | 49.16           | 569                   | rural              |
| CZ0049A | Churanov                   | 13.61            | 49.07           | 1118                  | elevated           |
| CZ0051A | Jesenik                    | 17.19            | 50.24           | 625                   | elevated           |
| CZ0055A | Krkonose-Rychory           | 15.85            | 50.66           | 1001                  | elevated           |
| CZ0057A | Hojna Voda                 | 14.72            | 48.72           | 818                   | elevated           |
| CZ0062A | Rudolice v Horach          | 13.42            | 50.58           | 840                   | elevated           |
| DE0003R | Schauinsland               | 7.91             | 47.91           | 1205                  | elevated           |
| DE0007R | Neuglobsow                 | 13.03            | 53.14           | 65                    | rural              |
| DE0008R | Schmücke                   | 10.77            | 50.65           | 937                   | elevated           |
| DE0009R | Zingst                     | 12.72            | 54.44           | 1                     | rural/coastal      |
| DE0035R | Lückendorf                 | 14.79            | 50.83           | 490                   | rural              |
| DE0422A | Riedstadt                  | 8.52             | 49.83           | 87                    | rural/polluted     |
| DE0510A | Neustadt a.d. Donau/Eining | 11.78            | 48.85           | 359                   | rural              |
| DE0514A | Mehring/Sportplatz         | 12.78            | 48.18           | 415                   | rural              |
| DE0556A | Zinnwald                   | 13.75            | 50.73           | 877                   | elevated           |
| DE0649A | Grebenau                   | 9.46             | 50.76           | 373                   | rural              |
| DE0651A | Witzenhausen/Wald          | 9.77             | 51.29           | 610                   | elevated           |
| DE0674A | Simmerath Eifel            | 6.28             | 50.65           | 572                   | elevated           |
| DE0679A | Tiefenbach/Altenschneeberg | 12.55            | 49.44           | 755                   | elevated           |
| DE0680A | Horn-Bad Meinberg Egge     | 8.95             | 51.83           | 430                   | elevated           |
| DE0684A | Schwarzwald Süd            | 7.76             | 47.81           | 920                   | elevated           |
| DE0685A | Westpfalz-Waldmohr         | 7.29             | 49.42           | 455                   | elevated           |

Table C1: continued. Background sites selected from the GEOmon harmonised data set including their categorisation as per Henne et al., 2010

| ID      | Station                     | Longitude<br>(°) | Latitude<br>(°) | Altitude<br>(m a.s.l) | GEOmon<br>Category |
|---------|-----------------------------|------------------|-----------------|-----------------------|--------------------|
| DE0686A | Hunsrück-Leisel             | 7.19             | 49.74           | 650                   | elevated           |
| DE0687A | Westeifel Wascheid          | 6.38             | 50.27           | 680                   | elevated           |
| DE0688A | Westerwald-Herdorf          | 7.97             | 50.77           | 480                   | elevated           |
| DE0699A | Welzheimer Wald             | 9.57             | 48.88           | 500                   | rural/polluted     |
| DE0719A | Spessart                    | 9.4              | 50.16           | 502                   | rural/polluted     |
| DE0732A | Solling                     | 9.58             | 51.76           | 500                   | elevated           |
| DE0735A | Netphen Rothaargebirge      | 8.19             | 50.93           | 635                   | elevated           |
| DE0737A | Pfälzerwald-Hortenkopf      | 7.83             | 49.27           | 606                   | elevated           |
| DE0738A | Naila/Selbitzer Berg        | 11.72            | 50.32           | 534                   | rural              |
| DE0739A | Fürth/Odenwald              | 8.82             | 49.65           | 484                   | rural/polluted     |
| DE0754A | B Grunewald (3.5 m)         | 13.23            | 52.47           | 50                    | suburban           |
| DE0844A | Bornhöved                   | 10.24            | 54.09           | 45                    | rural/polluted     |
| DE0874A | Soest-Ost                   | 8.15             | 51.57           | 110                   | rural              |
| DE0907A | Nidda                       | 9                | 50.42           | 193                   | rural/polluted     |
| DE0960A | Ueckermünde                 | 14.07            | 53.74           | 1                     | rural/coastal      |
| DE0996A | Wurmberg                    | 10.61            | 51.76           | 930                   | elevated           |
| EE0011R | Vilsandi                    | 21.85            | 58.38           | 6                     | remote             |
| ES0007R | Viznar                      | -3.32            | 37.14           | 1265                  | elevated           |
| ES1222A | Santa Maria de Palautordera | 2.44             | 41.69           | 208                   | rural/polluted     |
| ES1400A | Bujaraloz                   | -0.15            | 41.51           | 325                   | -                  |
| ES1435A | Vilafranca                  | -0.25            | 40.43           | 1125                  | rural              |
| ES1437A | Coratxar                    | 0.08             | 40.69           | 1200                  | rural              |
| ES1441A | Morella                     | -0.09            | 40.64           | 1150                  | rural              |
| FR08    | Donon                       | 7.13             | 48.5            | 775                   | elevated           |
| GB0002R | Eskdalemuir                 | -3.21            | 55.32           | 269                   | rural              |
| GB0006R | Lough Navar                 | -7.9             | 54.44           | 130                   | rural              |
| GB0013R | Yarner Wood                 | -3.72            | 50.6            | 119                   | rural              |
| GB0014R | High Muffles                | -0.81            | 54.33           | 267                   | rural              |
| GB0015R | Strath Vaich                | -4.78            | 57.73           | 270                   | remote             |
| GB0031R | Aston Hill                  | -3.33            | 52.5            | 370                   | rural              |
| GB0033R | Bush Estate                 | -3.21            | 55.86           | 180                   | suburban           |
| GB0036R | Harwell                     | -1.33            | 51.57           | 137                   | rural              |
| GB0037R | Lady Bower                  | -1.75            | 53.4            | 420                   | rural/polluted     |
| GB0038R | Lullington Heath            | 0.18             | 50.79           | 125                   | rural/coastal      |
| GB0039R | Sibton                      | 1.46             | 52.29           | 46                    | rural/coastal      |
| GB0044R | Somerton                    | -2.74            | 51.04           | 55                    | rural              |
| GB0045R | Wicken Fen                  | -0.29            | 52.3            | 5                     | rural/polluted     |
| GB0617A | Rochester Stoke             | 0.63             | 51.46           | 14                    | rural/polluted     |
| HPB     | Hohenpeissenberg            | 11.02            | 47.8            | 985                   | elevated           |
| HU0002R | K-puszta                    | 19.55            | 46.97           | 125                   | rural/agricultural |
| IE31    | Mace Head                   | -9.9             | 53.33           | 25                    | remote             |
| IT04    | Ispra                       | 8.63             | 45.8            | 209                   | valley/basin       |
| LT0015R | Preila                      | 21.03            | 55.38           | 5                     | rural/coastal      |
| LV0010R | Rucava                      | 21.17            | 56.16           | 18                    | rural              |
| NL0007R | Eibergen-Lintveldseweg      | 6.61             | 52.09           | 19                    | rural              |
| NL0009R | Kollumerwaard-Hooge Zuidwal | 6.28             | 53.33           | 1                     | rural/coastal      |

Table C1: continued. Background sites selected from the GEOmon harmonised data set including their categorisation as per Henne et al., 2010

| ID      | Station                           | Longitude<br>(°) | Latitude<br>(°) | Altitude<br>(m a.s.l) | GEOmon<br>Category |
|---------|-----------------------------------|------------------|-----------------|-----------------------|--------------------|
| NL0010R | Vredepeel-Vredeweg                | 5.85             | 51.54           | 28                    | rural/polluted     |
| NL0196A | Budel-Toom                        | 5.56             | 51.27           | 32                    | rural/polluted     |
| NL0198A | Zierikzee-Lange Slikweg           | 3.92             | 51.64           | -1                    | rural/coastal      |
| NL0202A | Posterholt-Vlodropperweg          | 6.04             | 51.12           | 32                    | rural/polluted     |
| NL0205A | Hellendoorn-Luttenbergerweg       | 6.4              | 52.39           | 7                     | rural              |
| NL0207A | Balk-Trophornsterweg              | 5.57             | 52.92           | 0                     | rural/coastal      |
| NL0209A | Cabauw-Zijdeweg                   | 4.93             | 51.97           | -1                    | rural/polluted     |
| NL0220A | Philippine-Stelleweg              | 3.75             | 51.3            | 5                     | rural/coastal      |
| NL0223A | Biest Houtakker-Biestsestraat     | 5.15             | 51.52           | 15                    | suburban           |
| NL0226A | Westmaas-Groeneweg                | 4.45             | 51.79           | 0                     | rural/polluted     |
| NL0227A | Wieringerwerf-<br>Medemblikkerweg | 5.05             | 52.8            | -4                    | rural/coastal      |
| NL0228A | Biddinghuizen-Hoekwantweg         | 5.62             | 52.45           | -4                    | rural/coastal      |
| NL0229A | Zegveld-Oude Meije                | 4.84             | 52.14           | -2                    | rural/polluted     |
| NL0231A | Barsbeek-De Veenen                | 6.02             | 52.66           | 0                     | rural              |
| NL0232A | Huijbergen-Vennekenstraat         | 4.36             | 51.44           | 18                    | suburban           |
| NL0250A | De Zilk-Vogelaarsdreef            | 4.51             | 52.3            | 4                     | rural/polluted     |
| NO01    | Birkenes                          | 8.25             | 58.38           | 190                   | rural              |
| PL03    | Sniezka                           | 15.74            | 50.74           | 1603                  | elevated           |
| PT0004R | Monte Velho                       | -8.8             | 38.08           | 43                    | rural/coastal      |
| PUY     | Puy de Dome                       | 3                | 45.75           | 1465                  | elevated           |
| SI0008R | Iskrba                            | 14.86            | 45.56           | 540                   | rural/agricultural |
| ZUG     | Zugspitze                         | 10.98            | 47.42           | 2950                  | elevated           |
